# Supplementary material
Source: publisher figshare collection journal article supplement (https://gsajournals.figshare.com/ndownloader/files/10708495)
Supplement: Supplementary file 1 [file 10708495]

## Sheet: Table S10 All Crosses Mitochond
##Row: The row in the 1536 array image (32 rows x48 columns)
##Col: The column in the 1536 array image
##Gene: The strain designation, in the format NuclearMito. The reference strain is designated "Ref" and is HLF3-90, a diploid generated from DBY947 .
##Media: The media type
##Temp: The temperature that this array was grown at in degrees Celsius
##Array: Number indicating which set of strains this strain belonged to
##Condition: Media_Temp
##Well: r[Row]c[Col]
##CC: Maximum size, aka Carrying capacity, estimated from the logistic growth model
##R: Growth rate estimated from the logistic growth model
##MinSize: Initial size of the colony estimated from the logistic growth model
##Corr: Correlation of the logistic growth model to the actual size data. All colonies with <0.95 were omitted.
##SizeDiff: CC - MinSize
##Norm_CC: CC divided by the average CC value of Ref on that Array, used to normalize out plate effects
##Norm_R: R divided by the average R value of Ref on that Array, this value was used for estimating Mito-Mito Epistasis
##Norm_SizeDiff: SizeDiff divided by the average SizeDiff value of Ref on that Array
##Nuclear: The nuclear genotype of the strain, C1 = YJM975, S1 = Y12, E1 = YPS606, E4 = Y55
##Mito: The mitochondrial haplotype of the strain, putative recominants are written as [Parent1][Parent2]
Row	Column	Gene	Media	Temp	Array	Condition	Well	CC	R	MinSize	Corr	SizeDiff	Norm_CC	Norm_R	Norm_SizeDiff	Nuclear	Mito
27	37	C1C1 rho c1e1 pr83	YPEG	30	2	YPEG_30	r27c37	2862.34	0.0668824	500.939	0.999287	2361.4	2.03735	1.07594	1.92649	C1C1	c1e1
27	36	C1C1 rho c1e1 pr83	YPEG	30	2	YPEG_30	r27c36	2901.75	0.066278	516.374	0.999508	2385.38	2.06541	1.06621	1.94606	C1C1	c1e1
27	35	C1C1 rho c1e1 pr83	YPEG	30	2	YPEG_30	r27c35	2885.21	0.0671441	496.497	0.999321	2388.71	2.05363	1.08015	1.94878	C1C1	c1e1
27	34	C1C1 rho c1e1 pr83	YPEG	30	2	YPEG_30	r27c34	2895.08	0.0677821	494.806	0.998805	2400.28	2.06066	1.09041	1.95821	C1C1	c1e1
27	39	C1C1 rho c1e1 pr83	YPEG	30	2	YPEG_30	r27c39	2880.71	0.0660939	507.184	0.999259	2373.52	2.05043	1.06325	1.93639	C1C1	c1e1
27	38	C1C1 rho c1e1 pr83	YPEG	30	2	YPEG_30	r27c38	2871.84	0.0665688	515.468	0.999542	2356.37	2.04412	1.07089	1.92239	C1C1	c1e1
26	38	C1C1 rho c1e1 pr83	YPEG	30	2	YPEG_30	r26c38	2925.83	0.0655098	535.913	0.999567	2389.92	2.08255	1.05386	1.94976	C1C1	c1e1
26	37	C1C1 rho c1e1 pr83	YPEG	30	2	YPEG_30	r26c37	2837.04	0.0678384	495.814	0.999181	2341.23	2.01935	1.09132	1.91004	C1C1	c1e1
26	36	C1C1 rho c1e1 pr83	YPEG	30	2	YPEG_30	r26c36	2875.98	0.0670117	521.059	0.999392	2354.92	2.04706	1.07802	1.92121	C1C1	c1e1
26	35	C1C1 rho c1e1 pr83	YPEG	30	2	YPEG_30	r26c35	2853.89	0.0686096	500.775	0.999265	2353.12	2.03134	1.10372	1.91974	C1C1	c1e1
26	34	C1C1 rho c1e1 pr83	YPEG	30	2	YPEG_30	r26c34	2837.79	0.0686164	484.721	0.998889	2353.07	2.01988	1.10383	1.9197	C1C1	c1e1
26	39	C1C1 rho c1e1 pr83	YPEG	30	2	YPEG_30	r26c39	2840.94	0.0670256	496.459	0.999268	2344.48	2.02212	1.07824	1.91269	C1C1	c1e1
26	34	C1C1 rho c1e4 pr39	YPD	37	3	YPD_37	r26c34	2335.7	0.103885	810.546	0.98675	1525.16	1.45878	0.622924	1.27947	C1C1	c1e4
26	38	C1C1 rho c1e4 pr39	YPD	37	3	YPD_37	r26c38	2407.5	0.100997	846.609	0.987869	1560.89	1.50362	0.605607	1.30945	C1C1	c1e4
26	39	C1C1 rho c1e4 pr39	YPD	37	3	YPD_37	r26c39	2380.03	0.102612	815.343	0.986956	1564.68	1.48646	0.61529	1.31263	C1C1	c1e4
26	35	C1C1 rho c1e4 pr39	YPD	37	3	YPD_37	r26c35	2302.15	0.104521	790.12	0.986948	1512.03	1.43783	0.626738	1.26846	C1C1	c1e4
26	37	C1C1 rho c1e4 pr39	YPD	37	3	YPD_37	r26c37	2364.36	0.102383	830.366	0.9875	1533.99	1.47668	0.613915	1.28688	C1C1	c1e4
26	36	C1C1 rho c1e4 pr39	YPD	37	3	YPD_37	r26c36	2318.38	0.103575	800.442	0.98725	1517.94	1.44796	0.621061	1.27341	C1C1	c1e4
27	39	C1C1 rho c1e4 pr39	YPD	37	3	YPD_37	r27c39	2381.45	0.0997042	830.586	0.987289	1550.87	1.48735	0.597853	1.30104	C1C1	c1e4
27	34	C1C1 rho c1e4 pr39	YPD	37	3	YPD_37	r27c34	2374.16	0.100974	831.467	0.98757	1542.69	1.4828	0.605469	1.29417	C1C1	c1e4
27	38	C1C1 rho c1e4 pr39	YPD	37	3	YPD_37	r27c38	2418.07	0.0990931	855.528	0.988066	1562.55	1.51022	0.594189	1.31083	C1C1	c1e4
27	35	C1C1 rho c1e4 pr39	YPD	37	3	YPD_37	r27c35	2328.91	0.101382	802.501	0.98665	1526.41	1.45454	0.607914	1.28051	C1C1	c1e4
27	37	C1C1 rho c1e4 pr39	YPD	37	3	YPD_37	r27c37	2393.03	0.101218	834.191	0.988208	1558.84	1.49458	0.606929	1.30772	C1C1	c1e4
27	36	C1C1 rho c1e4 pr39	YPD	37	3	YPD_37	r27c36	2414.01	0.101674	849.282	0.987406	1564.73	1.50769	0.609665	1.31266	C1C1	c1e4
7	28	C1C1 rho e1e4 pr22	YPEG	30	6	YPEG_30	r7c28	2762.12	0.0632975	395.722	0.99851	2366.39	1.85485	1.01688	1.81395	C1C1	e1e4
7	27	C1C1 rho e1e4 pr22	YPEG	30	6	YPEG_30	r7c27	2802.26	0.0630181	410.606	0.998566	2391.65	1.88181	1.0124	1.83331	C1C1	e1e4
7	26	C1C1 rho e1e4 pr22	YPEG	30	6	YPEG_30	r7c26	2660.75	0.0649231	360.949	0.998781	2299.8	1.78678	1.043	1.7629	C1C1	e1e4
7	31	C1C1 rho e1e4 pr22	YPEG	30	6	YPEG_30	r7c31	2806.66	0.0623797	412.87	0.998437	2393.79	1.88477	1.00214	1.83495	C1C1	e1e4
7	30	C1C1 rho e1e4 pr22	YPEG	30	6	YPEG_30	r7c30	2740.63	0.0630864	395.212	0.998587	2345.42	1.84043	1.01349	1.79787	C1C1	e1e4
7	29	C1C1 rho e1e4 pr22	YPEG	30	6	YPEG_30	r7c29	2795.36	0.0631085	410.816	0.998312	2384.54	1.87718	1.01385	1.82786	C1C1	e1e4
6	26	C1C1 rho e1e4 pr22	YPEG	30	6	YPEG_30	r6c26	2777.85	0.0633514	392.745	0.998645	2385.1	1.86542	1.01775	1.82829	C1C1	e1e4
6	31	C1C1 rho e1e4 pr22	YPEG	30	6	YPEG_30	r6c31	2876.46	0.0614703	427.436	0.998464	2449.03	1.93164	0.98753	1.87729	C1C1	e1e4
6	30	C1C1 rho e1e4 pr22	YPEG	30	6	YPEG_30	r6c30	2905.93	0.0614506	437.097	0.998364	2468.83	1.95143	0.987214	1.89247	C1C1	e1e4
6	29	C1C1 rho e1e4 pr22	YPEG	30	6	YPEG_30	r6c29	2874.51	0.0619686	428.375	0.998553	2446.14	1.93033	0.995536	1.87508	C1C1	e1e4
6	28	C1C1 rho e1e4 pr22	YPEG	30	6	YPEG_30	r6c28	2828.54	0.0628267	406.923	0.998556	2421.62	1.89946	1.00932	1.85628	C1C1	e1e4
6	27	C1C1 rho e1e4 pr22	YPEG	30	6	YPEG_30	r6c27	2883.84	0.0620115	424.283	0.998574	2459.55	1.93659	0.996224	1.88536	C1C1	e1e4
3	11	C1C1 rho c1e1 pr 2	SOE	30	1	SOE_30	r3c11	1070.94	0.162461	384.754	0.999727	686.185	1.00913	1.18912	0.957891	C1C1	c1e1
3	12	C1C1 rho c1e1 pr 2	SOE	30	1	SOE_30	r3c12	1067.15	0.15621	406.818	0.999708	660.328	1.00555	1.14337	0.921795	C1C1	c1e1
3	13	C1C1 rho c1e1 pr 2	SOE	30	1	SOE_30	r3c13	1065.83	0.153318	407.097	0.999696	658.729	1.00431	1.1222	0.919563	C1C1	c1e1
3	14	C1C1 rho c1e1 pr 2	SOE	30	1	SOE_30	r3c14	1096.96	0.15092	428.636	0.999483	668.326	1.03365	1.10464	0.93296	C1C1	c1e1
3	10	C1C1 rho c1e1 pr 2	SOE	30	1	SOE_30	r3c10	1085.52	0.150354	410.351	0.999495	675.166	1.02286	1.1005	0.942508	C1C1	c1e1
3	15	C1C1 rho c1e1 pr 2	SOE	30	1	SOE_30	r3c15	1059.69	0.161465	375.051	0.999522	684.642	0.998529	1.18183	0.955736	C1C1	c1e1
26	35	C1C1 rho c1e1 pr77	YPD	37	1	YPD_37	r26c35	2463.71	0.107447	804.171	0.991995	1659.54	1.67664	0.606976	1.55515	C1C1	c1e1
26	37	C1C1 rho c1e1 pr77	YPD	37	1	YPD_37	r26c37	2457.32	0.105395	806.386	0.991951	1650.94	1.6723	0.595385	1.54709	C1C1	c1e1
26	36	C1C1 rho c1e1 pr77	YPD	37	1	YPD_37	r26c36	2410.98	0.106873	778.46	0.99191	1632.52	1.64076	0.603733	1.52983	C1C1	c1e1
26	34	C1C1 rho c1e1 pr77	YPD	37	1	YPD_37	r26c34	2482.79	0.107657	806.891	0.990602	1675.9	1.68963	0.608161	1.57048	C1C1	c1e1
26	38	C1C1 rho c1e1 pr77	YPD	37	1	YPD_37	r26c38	2502.23	0.103498	822.659	0.991723	1679.57	1.70286	0.584667	1.57392	C1C1	c1e1
26	39	C1C1 rho c1e1 pr77	YPD	37	1	YPD_37	r26c39	2457.34	0.106489	787.153	0.991341	1670.19	1.67231	0.601567	1.56513	C1C1	c1e1
27	35	C1C1 rho c1e1 pr77	YPD	37	1	YPD_37	r27c35	2442.87	0.106513	782.172	0.990866	1660.7	1.66247	0.601703	1.55624	C1C1	c1e1
27	37	C1C1 rho c1e1 pr77	YPD	37	1	YPD_37	r27c37	2494.03	0.104749	820.694	0.992463	1673.34	1.69728	0.591735	1.56808	C1C1	c1e1
27	36	C1C1 rho c1e1 pr77	YPD	37	1	YPD_37	r27c36	2550.11	0.105227	849.532	0.991883	1700.58	1.73545	0.594435	1.59361	C1C1	c1e1
27	34	C1C1 rho c1e1 pr77	YPD	37	1	YPD_37	r27c34	2499.95	0.105239	827.195	0.991137	1672.76	1.70131	0.594504	1.56754	C1C1	c1e1
27	39	C1C1 rho c1e1 pr77	YPD	37	1	YPD_37	r27c39	2517.76	0.104403	830.316	0.992154	1687.44	1.71343	0.589784	1.5813	C1C1	c1e1
27	38	C1C1 rho c1e1 pr77	YPD	37	1	YPD_37	r27c38	2596.53	0.103785	874.7	0.991903	1721.83	1.76703	0.58629	1.61352	C1C1	c1e1
10	12	C1C1 rho c1e1 pr32	YPD	30	2	YPD_30	r10c12	2395.63	0.109753	629.599	0.993502	1766.03	1.67471	0.551596	1.60586	C1C1	c1e1
10	11	C1C1 rho c1e1 pr32	YPD	30	2	YPD_30	r10c11	2446.14	0.108187	654.658	0.993374	1791.48	1.71002	0.543727	1.629	C1C1	c1e1
10	10	C1C1 rho c1e1 pr32	YPD	30	2	YPD_30	r10c10	2376.59	0.110957	603.836	0.992757	1772.75	1.6614	0.557649	1.61197	C1C1	c1e1
11	11	C1C1 rho c1e1 pr32	YPD	30	2	YPD_30	r11c11	2592.12	0.10223	682.01	0.994016	1910.11	1.81207	0.513787	1.73687	C1C1	c1e1
11	10	C1C1 rho c1e1 pr32	YPD	30	2	YPD_30	r11c10	2479.72	0.104339	627.175	0.993322	1852.54	1.73349	0.524388	1.68453	C1C1	c1e1
11	14	C1C1 rho c1e1 pr32	YPD	30	2	YPD_30	r11c14	2456.17	0.103824	632.792	0.993722	1823.37	1.71703	0.521797	1.658	C1C1	c1e1
11	13	C1C1 rho c1e1 pr32	YPD	30	2	YPD_30	r11c13	2526.6	0.101861	647.361	0.993598	1879.24	1.76627	0.511933	1.7088	C1C1	c1e1
11	12	C1C1 rho c1e1 pr32	YPD	30	2	YPD_30	r11c12	2564.22	0.102102	669.905	0.993847	1894.31	1.79256	0.513145	1.72251	C1C1	c1e1
11	15	C1C1 rho c1e1 pr32	YPD	30	2	YPD_30	r11c15	2468.33	0.104735	652.698	0.993594	1815.63	1.72553	0.526379	1.65096	C1C1	c1e1
10	14	C1C1 rho c1e1 pr32	YPD	30	2	YPD_30	r10c14	2430.06	0.109885	654.221	0.994191	1775.84	1.69878	0.55226	1.61478	C1C1	c1e1
10	13	C1C1 rho c1e1 pr32	YPD	30	2	YPD_30	r10c13	2438.37	0.108961	652.162	0.994003	1786.21	1.70459	0.547614	1.62421	C1C1	c1e1
10	15	C1C1 rho c1e1 pr32	YPD	30	2	YPD_30	r10c15	2370.47	0.111933	628.584	0.993824	1741.88	1.65712	0.562554	1.5839	C1C1	c1e1
30	18	C1C1 rho c1e1 pr87	YPD	30	1	YPD_30	r30c18	2393.87	0.121619	606.061	0.992881	1787.81	1.78635	0.586755	1.83747	C1C1	c1e1
30	21	C1C1 rho c1e1 pr87	YPD	30	1	YPD_30	r30c21	2502.72	0.120453	639.002	0.993468	1863.72	1.86758	0.581132	1.91549	C1C1	c1e1
30	20	C1C1 rho c1e1 pr87	YPD	30	1	YPD_30	r30c20	2393.76	0.119389	603.664	0.992846	1790.09	1.78627	0.576	1.83982	C1C1	c1e1
30	19	C1C1 rho c1e1 pr87	YPD	30	1	YPD_30	r30c19	2475.45	0.117644	656.896	0.993138	1818.55	1.84723	0.567579	1.86907	C1C1	c1e1
30	23	C1C1 rho c1e1 pr87	YPD	30	1	YPD_30	r30c23	2453.82	0.119299	616.023	0.993002	1837.8	1.83109	0.575565	1.88884	C1C1	c1e1
30	22	C1C1 rho c1e1 pr87	YPD	30	1	YPD_30	r30c22	2538.68	0.120312	654.549	0.993683	1884.13	1.89441	0.58045	1.93647	C1C1	c1e1
22	31	C1C1 rho c1e4 pr31	YPD	37	3	YPD_37	r22c31	2415.43	0.105643	839.859	0.98798	1575.57	1.50857	0.633463	1.32176	C1C1	c1e4
22	29	C1C1 rho c1e4 pr31	YPD	37	3	YPD_37	r22c29	2426.22	0.104297	865.281	0.988594	1560.94	1.51531	0.625394	1.30948	C1C1	c1e4
22	28	C1C1 rho c1e4 pr31	YPD	37	3	YPD_37	r22c28	2339.75	0.105222	809.176	0.988266	1530.58	1.46131	0.630939	1.28401	C1C1	c1e4
22	30	C1C1 rho c1e4 pr31	YPD	37	3	YPD_37	r22c30	2393.05	0.105418	841.773	0.988951	1551.28	1.4946	0.632115	1.30138	C1C1	c1e4
22	26	C1C1 rho c1e4 pr31	YPD	37	3	YPD_37	r22c26	2434.09	0.103222	878.355	0.988169	1555.73	1.52023	0.618946	1.30512	C1C1	c1e4
22	27	C1C1 rho c1e4 pr31	YPD	37	3	YPD_37	r22c27	2376.89	0.104615	834.892	0.988633	1541.99	1.4845	0.627301	1.29359	C1C1	c1e4
23	26	C1C1 rho c1e4 pr31	YPD	37	3	YPD_37	r23c26	2361.95	0.105134	825.084	0.987816	1536.87	1.47517	0.63041	1.28929	C1C1	c1e4
23	29	C1C1 rho c1e4 pr31	YPD	37	3	YPD_37	r23c29	2483.38	0.104458	879.908	0.988639	1603.47	1.55101	0.626357	1.34516	C1C1	c1e4
23	30	C1C1 rho c1e4 pr31	YPD	37	3	YPD_37	r23c30	2456.51	0.104758	864.51	0.989081	1592	1.53423	0.628157	1.33554	C1C1	c1e4
23	27	C1C1 rho c1e4 pr31	YPD	37	3	YPD_37	r23c27	2468.02	0.103188	883.165	0.988737	1584.85	1.54142	0.618744	1.32954	C1C1	c1e4
23	28	C1C1 rho c1e4 pr31	YPD	37	3	YPD_37	r23c28	2449.47	0.104777	867.213	0.988751	1582.25	1.52983	0.628271	1.32737	C1C1	c1e4
23	31	C1C1 rho c1e4 pr31	YPD	37	3	YPD_37	r23c31	2396.31	0.103434	837.052	0.989342	1559.26	1.49663	0.620216	1.30808	C1C1	c1e4
15	20	C1C1 rho c1s1 d132	YPEG	30	4	YPEG_30	r15c20	2804.16	0.0686162	456.498	0.998941	2347.66	1.94757	1.05852	1.85209	C1C1	c1s1
15	19	C1C1 rho c1s1 d132	YPEG	30	4	YPEG_30	r15c19	2746.09	0.0689208	445.401	0.998965	2300.69	1.90724	1.06321	1.81504	C1C1	c1s1
15	18	C1C1 rho c1s1 d132	YPEG	30	4	YPEG_30	r15c18	2827.16	0.0669776	481.196	0.999165	2345.97	1.96355	1.03324	1.85075	C1C1	c1s1
15	23	C1C1 rho c1s1 d132	YPEG	30	4	YPEG_30	r15c23	2818.81	0.0683029	461.289	0.998916	2357.52	1.95775	1.05368	1.85987	C1C1	c1s1
15	22	C1C1 rho c1s1 d132	YPEG	30	4	YPEG_30	r15c22	2806.39	0.068523	457.158	0.999042	2349.24	1.94912	1.05708	1.85333	C1C1	c1s1
15	21	C1C1 rho c1s1 d132	YPEG	30	4	YPEG_30	r15c21	2741.26	0.0692384	431.784	0.998799	2309.48	1.90389	1.06811	1.82197	C1C1	c1s1
14	22	C1C1 rho c1s1 d132	YPEG	30	4	YPEG_30	r14c22	2741.34	0.0685417	441.053	0.998866	2300.29	1.90394	1.05737	1.81472	C1C1	c1s1
14	21	C1C1 rho c1s1 d132	YPEG	30	4	YPEG_30	r14c21	2826.93	0.0682913	462.372	0.998975	2364.56	1.96338	1.0535	1.86542	C1C1	c1s1
14	20	C1C1 rho c1s1 d132	YPEG	30	4	YPEG_30	r14c20	2798.1	0.0686934	443.355	0.998845	2354.74	1.94336	1.05971	1.85768	C1C1	c1s1
14	19	C1C1 rho c1s1 d132	YPEG	30	4	YPEG_30	r14c19	2780.19	0.0682935	448.637	0.998951	2331.55	1.93092	1.05354	1.83939	C1C1	c1s1
14	18	C1C1 rho c1s1 d132	YPEG	30	4	YPEG_30	r14c18	2727.9	0.0695439	433.306	0.998849	2294.59	1.8946	1.07283	1.81022	C1C1	c1s1
14	23	C1C1 rho c1s1 d132	YPEG	30	4	YPEG_30	r14c23	2739.42	0.0693568	433.944	0.999054	2305.47	1.9026	1.06994	1.81881	C1C1	c1s1
22	3	C1C1 rho e1e4 pr67	SOE	30	6	SOE_30	r22c3	1168.83	0.10942	477.001	0.999322	691.824	1.00991	1.02742	0.92122	C1C1	e1e4
22	4	C1C1 rho e1e4 pr67	SOE	30	6	SOE_30	r22c4	1082.26	0.11631	471.478	0.998792	610.778	0.935113	1.09211	0.8133	C1C1	e1e4
22	5	C1C1 rho e1e4 pr67	SOE	30	6	SOE_30	r22c5	1091.96	0.122382	501.953	0.998799	590.007	0.943498	1.14912	0.785642	C1C1	e1e4
22	6	C1C1 rho e1e4 pr67	SOE	30	6	SOE_30	r22c6	1046	0.123838	492.392	0.997963	553.605	0.903784	1.1628	0.73717	C1C1	e1e4
23	5	C1C1 rho e1e4 pr67	SOE	30	6	SOE_30	r23c5	1047.4	0.123798	473.072	0.998469	574.33	0.904998	1.16242	0.764766	C1C1	e1e4
23	6	C1C1 rho e1e4 pr67	SOE	30	6	SOE_30	r23c6	1043.79	0.125326	490.565	0.998408	553.226	0.901877	1.17677	0.736664	C1C1	e1e4
23	7	C1C1 rho e1e4 pr67	SOE	30	6	SOE_30	r23c7	1003.88	0.134251	454.54	0.998905	549.336	0.867389	1.26057	0.731485	C1C1	e1e4
23	3	C1C1 rho e1e4 pr67	SOE	30	6	SOE_30	r23c3	1117.52	0.11131	445.635	0.999124	671.881	0.965579	1.04517	0.894663	C1C1	e1e4
23	4	C1C1 rho e1e4 pr67	SOE	30	6	SOE_30	r23c4	1094.51	0.118009	476.098	0.999036	618.416	0.945704	1.10807	0.82347	C1C1	e1e4
22	7	C1C1 rho e1e4 pr67	SOE	30	6	SOE_30	r22c7	1035.46	0.129468	483.602	0.998953	551.857	0.894678	1.21566	0.734842	C1C1	e1e4
15	30	C1C1 rho e1e4 pr40	SOE	37	5	SOE_37	r15c30	1013.54	0.213943	327.402	0.997475	686.134	0.977044	1.67145	0.997228	C1C1	e1e4
15	31	C1C1 rho e1e4 pr40	SOE	37	5	SOE_37	r15c31	1034.92	0.209377	342.342	0.997296	692.576	0.997657	1.63578	1.00659	C1C1	e1e4
15	27	C1C1 rho e1e4 pr40	SOE	37	5	SOE_37	r15c27	1057.61	0.199271	364.544	0.998374	693.062	1.01953	1.55683	1.0073	C1C1	e1e4
15	26	C1C1 rho e1e4 pr40	SOE	37	5	SOE_37	r15c26	1067.75	0.203437	363.551	0.997615	704.194	1.0293	1.58937	1.02348	C1C1	e1e4
15	29	C1C1 rho e1e4 pr40	SOE	37	5	SOE_37	r15c29	1031.85	0.202465	353.684	0.997603	678.17	0.994702	1.58178	0.985652	C1C1	e1e4
15	28	C1C1 rho e1e4 pr40	SOE	37	5	SOE_37	r15c28	986.033	0.204014	322.346	0.997173	663.686	0.950531	1.59388	0.964602	C1C1	e1e4
14	30	C1C1 rho e1e4 pr40	SOE	37	5	SOE_37	r14c30	1112.31	0.187055	420.643	0.998435	691.662	1.07226	1.46139	1.00526	C1C1	e1e4
14	31	C1C1 rho e1e4 pr40	SOE	37	5	SOE_37	r14c31	1130.12	0.174559	447.213	0.998861	682.906	1.08943	1.36376	0.992536	C1C1	e1e4
14	28	C1C1 rho e1e4 pr40	SOE	37	5	SOE_37	r14c28	1124.49	0.188579	423.293	0.998244	701.201	1.08401	1.47329	1.01913	C1C1	e1e4
14	27	C1C1 rho e1e4 pr40	SOE	37	5	SOE_37	r14c27	1070.82	0.20197	369.721	0.998295	701.102	1.03227	1.57791	1.01898	C1C1	e1e4
14	29	C1C1 rho e1e4 pr40	SOE	37	5	SOE_37	r14c29	1019.92	0.204911	347.867	0.997644	672.049	0.983194	1.60088	0.976756	C1C1	e1e4
14	26	C1C1 rho e1e4 pr40	SOE	37	5	SOE_37	r14c26	1005.87	0.21795	310.722	0.996359	695.149	0.969656	1.70275	1.01033	C1C1	e1e4
19	36	C1C1 rho c1e1 pr53	SOE	37	1	SOE_37	r19c36	861.849	0.207815	166.789	0.998535	695.06	1.10119	1.49147	1.11267	C1C1	c1e1
19	35	C1C1 rho c1e1 pr53	SOE	37	1	SOE_37	r19c35	822.796	0.209405	157.386	0.99863	665.41	1.05129	1.50288	1.06521	C1C1	c1e1
19	39	C1C1 rho c1e1 pr53	SOE	37	1	SOE_37	r19c39	904.848	0.207897	171.886	0.9987	732.961	1.15612	1.49205	1.17335	C1C1	c1e1
19	37	C1C1 rho c1e1 pr53	SOE	37	1	SOE_37	r19c37	863.058	0.200529	172.947	0.999009	690.111	1.10273	1.43918	1.10475	C1C1	c1e1
19	38	C1C1 rho c1e1 pr53	SOE	37	1	SOE_37	r19c38	888.643	0.208279	170.703	0.998805	717.94	1.13542	1.4948	1.1493	C1C1	c1e1
19	34	C1C1 rho c1e1 pr53	SOE	37	1	SOE_37	r19c34	913.455	0.213133	183.057	0.998654	730.398	1.16712	1.52963	1.16924	C1C1	c1e1
18	38	C1C1 rho c1e1 pr53	SOE	37	1	SOE_37	r18c38	920.484	0.215645	169.184	0.998311	751.3	1.1761	1.54767	1.20271	C1C1	c1e1
18	35	C1C1 rho c1e1 pr53	SOE	37	1	SOE_37	r18c35	842.77	0.216083	175.02	0.998524	667.75	1.07681	1.5508	1.06896	C1C1	c1e1
18	34	C1C1 rho c1e1 pr53	SOE	37	1	SOE_37	r18c34	871.398	0.212657	179.733	0.998117	691.666	1.11339	1.52622	1.10724	C1C1	c1e1
18	37	C1C1 rho c1e1 pr53	SOE	37	1	SOE_37	r18c37	865.611	0.210857	164.289	0.998808	701.322	1.10599	1.5133	1.1227	C1C1	c1e1
18	36	C1C1 rho c1e1 pr53	SOE	37	1	SOE_37	r18c36	840.103	0.21897	163.35	0.99871	676.753	1.0734	1.57152	1.08337	C1C1	c1e1
14	18	C1C1 rho c1e1 pr45	YPEG	37	2	YPEG_37	r14c18	2988.66	0.0491556	479.05	0.997568	2509.61	2.52735	0.722099	2.4716	C1C1	c1e1
14	19	C1C1 rho c1e1 pr45	YPEG	37	2	YPEG_37	r14c19	2913.58	0.0496201	473.347	0.997146	2440.23	2.46386	0.728922	2.40327	C1C1	c1e1
14	20	C1C1 rho c1e1 pr45	YPEG	37	2	YPEG_37	r14c20	2813.21	0.0497664	456.489	0.996854	2356.73	2.37898	0.731072	2.32103	C1C1	c1e1
14	21	C1C1 rho c1e1 pr45	YPEG	37	2	YPEG_37	r14c21	2727.51	0.051298	443.211	0.996786	2284.3	2.30651	0.753571	2.2497	C1C1	c1e1
14	23	C1C1 rho c1e1 pr45	YPEG	37	2	YPEG_37	r14c23	2738.73	0.0520262	466.213	0.99677	2272.51	2.31599	0.764269	2.23809	C1C1	c1e1
14	22	C1C1 rho c1e1 pr45	YPEG	37	2	YPEG_37	r14c22	2624.87	0.0519577	419.886	0.996892	2204.98	2.21971	0.763262	2.17158	C1C1	c1e1
15	19	C1C1 rho c1e1 pr45	YPEG	37	2	YPEG_37	r15c19	2879.37	0.0494611	462.371	0.997145	2417	2.43493	0.726587	2.38039	C1C1	c1e1
15	20	C1C1 rho c1e1 pr45	YPEG	37	2	YPEG_37	r15c20	2759.95	0.0503871	445.811	0.996971	2314.14	2.33394	0.74019	2.27909	C1C1	c1e1
15	21	C1C1 rho c1e1 pr45	YPEG	37	2	YPEG_37	r15c21	2654.15	0.051439	422.425	0.997033	2231.73	2.24447	0.755643	2.19792	C1C1	c1e1
15	23	C1C1 rho c1e1 pr45	YPEG	37	2	YPEG_37	r15c23	2644.32	0.0524452	430.074	0.996852	2214.25	2.23616	0.770424	2.18071	C1C1	c1e1
15	22	C1C1 rho c1e1 pr45	YPEG	37	2	YPEG_37	r15c22	2669.28	0.0521826	435.825	0.997198	2233.46	2.25727	0.766567	2.19963	C1C1	c1e1
15	18	C1C1 rho c1e1 pr45	YPEG	37	2	YPEG_37	r15c18	3083.42	0.0477882	495.384	0.997187	2588.03	2.60748	0.702012	2.54883	C1C1	c1e1
6	31	C1C1 rho e1e4 pr22	SOE	37	6	SOE_37	r6c31	1094.6	0.17472	431.059	0.998669	663.545	1.08464	1.39922	0.971617	C1C1	e1e4
6	30	C1C1 rho e1e4 pr22	SOE	37	6	SOE_37	r6c30	1106.34	0.176348	435.139	0.99884	671.202	1.09627	1.41226	0.98283	C1C1	e1e4
6	26	C1C1 rho e1e4 pr22	SOE	37	6	SOE_37	r6c26	1066.71	0.185479	390.619	0.998287	676.088	1.05699	1.48538	0.989983	C1C1	e1e4
6	27	C1C1 rho e1e4 pr22	SOE	37	6	SOE_37	r6c27	1107.47	0.176594	425.869	0.998922	681.599	1.09738	1.41423	0.998054	C1C1	e1e4
6	29	C1C1 rho e1e4 pr22	SOE	37	6	SOE_37	r6c29	1091.67	0.178086	426.4	0.999099	665.265	1.08172	1.42617	0.974137	C1C1	e1e4
6	28	C1C1 rho e1e4 pr22	SOE	37	6	SOE_37	r6c28	1060.87	0.187096	390.38	0.998767	670.493	1.05121	1.49833	0.981792	C1C1	e1e4
7	29	C1C1 rho e1e4 pr22	SOE	37	6	SOE_37	r7c29	1042.78	0.182966	399.024	0.998774	643.758	1.03329	1.46525	0.942644	C1C1	e1e4
7	28	C1C1 rho e1e4 pr22	SOE	37	6	SOE_37	r7c28	1090.95	0.177347	428.868	0.998786	662.081	1.08101	1.42025	0.969473	C1C1	e1e4
7	31	C1C1 rho e1e4 pr22	SOE	37	6	SOE_37	r7c31	1019.94	0.19423	363.438	0.99812	656.507	1.01066	1.55546	0.961311	C1C1	e1e4
7	30	C1C1 rho e1e4 pr22	SOE	37	6	SOE_37	r7c30	1050.92	0.186764	389.057	0.998447	661.858	1.04135	1.49567	0.969148	C1C1	e1e4
7	26	C1C1 rho e1e4 pr22	SOE	37	6	SOE_37	r7c26	1037.88	0.184148	381.73	0.998176	656.148	1.02843	1.47472	0.960786	C1C1	e1e4
7	27	C1C1 rho e1e4 pr22	SOE	37	6	SOE_37	r7c27	1064.96	0.188404	392.335	0.998527	672.628	1.05526	1.5088	0.984917	C1C1	e1e4
19	22	C1C1 rho c1e1 pr57	SOE	37	2	SOE_37	r19c22	1184.29	0.210328	387.129	0.99799	797.165	1.15285	1.50037	1.13058	C1C1	c1e1
19	20	C1C1 rho c1e1 pr57	SOE	37	2	SOE_37	r19c20	1233.87	0.204326	414.659	0.998304	819.213	1.20112	1.45755	1.16185	C1C1	c1e1
19	21	C1C1 rho c1e1 pr57	SOE	37	2	SOE_37	r19c21	1181.03	0.211638	377.082	0.998076	803.952	1.14968	1.50972	1.1402	C1C1	c1e1
19	23	C1C1 rho c1e1 pr57	SOE	37	2	SOE_37	r19c23	1209.58	0.207493	402.411	0.998449	807.167	1.17747	1.48014	1.14476	C1C1	c1e1
19	19	C1C1 rho c1e1 pr57	SOE	37	2	SOE_37	r19c19	1046.43	0.210284	310.65	0.997847	735.783	1.01865	1.50005	1.04352	C1C1	c1e1
19	18	C1C1 rho c1e1 pr57	SOE	37	2	SOE_37	r19c18	1251.86	0.206044	415.812	0.9973	836.049	1.21863	1.46981	1.18572	C1C1	c1e1
18	21	C1C1 rho c1e1 pr57	SOE	37	2	SOE_37	r18c21	1088.88	0.220491	316.325	0.998152	772.555	1.05997	1.57286	1.09567	C1C1	c1e1
18	20	C1C1 rho c1e1 pr57	SOE	37	2	SOE_37	r18c20	1160.91	0.211423	373.152	0.998371	787.755	1.13009	1.50818	1.11723	C1C1	c1e1
18	22	C1C1 rho c1e1 pr57	SOE	37	2	SOE_37	r18c22	1160.64	0.214039	368.46	0.997928	792.177	1.12982	1.52684	1.1235	C1C1	c1e1
18	23	C1C1 rho c1e1 pr57	SOE	37	2	SOE_37	r18c23	1137.48	0.221052	345.851	0.998031	791.629	1.10728	1.57687	1.12273	C1C1	c1e1
18	19	C1C1 rho c1e1 pr57	SOE	37	2	SOE_37	r18c19	1225.86	0.199399	425.201	0.998631	800.654	1.19331	1.42241	1.13553	C1C1	c1e1
18	18	C1C1 rho c1e1 pr57	SOE	37	2	SOE_37	r18c18	1164.99	0.208234	359.985	0.997146	805.009	1.13407	1.48543	1.1417	C1C1	c1e1
14	39	C1C1 rho c1e1 pr47	YPD	37	2	YPD_37	r14c39	2459.52	0.111125	820.027	0.991239	1639.49	1.51582	0.641447	1.33577	C1C1	c1e1
14	37	C1C1 rho c1e1 pr47	YPD	37	2	YPD_37	r14c37	2468.32	0.115177	811.418	0.991157	1656.9	1.52124	0.664834	1.34995	C1C1	c1e1
14	38	C1C1 rho c1e1 pr47	YPD	37	2	YPD_37	r14c38	2545.89	0.112667	872.854	0.991296	1673.03	1.56905	0.650348	1.36309	C1C1	c1e1
15	34	C1C1 rho c1e1 pr47	YPD	37	2	YPD_37	r15c34	2429.11	0.116583	769.576	0.989685	1659.53	1.49708	0.672953	1.35209	C1C1	c1e1
15	36	C1C1 rho c1e1 pr47	YPD	37	2	YPD_37	r15c36	2435.61	0.117297	769.297	0.989195	1666.31	1.50108	0.677074	1.35762	C1C1	c1e1
15	35	C1C1 rho c1e1 pr47	YPD	37	2	YPD_37	r15c35	2506.32	0.116136	819.329	0.991125	1686.99	1.54466	0.67037	1.37447	C1C1	c1e1
15	39	C1C1 rho c1e1 pr47	YPD	37	2	YPD_37	r15c39	2491.95	0.113383	832.699	0.99095	1659.25	1.53581	0.654476	1.35187	C1C1	c1e1
15	37	C1C1 rho c1e1 pr47	YPD	37	2	YPD_37	r15c37	2412.59	0.114936	776.057	0.989794	1636.53	1.4869	0.663443	1.33336	C1C1	c1e1
15	38	C1C1 rho c1e1 pr47	YPD	37	2	YPD_37	r15c38	2553.83	0.113323	876.266	0.991114	1677.56	1.57394	0.654136	1.36678	C1C1	c1e1
14	36	C1C1 rho c1e1 pr47	YPD	37	2	YPD_37	r14c36	2460.98	0.115511	791.416	0.990682	1669.57	1.51672	0.66676	1.36027	C1C1	c1e1
14	35	C1C1 rho c1e1 pr47	YPD	37	2	YPD_37	r14c35	2492.63	0.114265	821.133	0.991064	1671.5	1.53623	0.659573	1.36185	C1C1	c1e1
14	34	C1C1 rho c1e1 pr47	YPD	37	2	YPD_37	r14c34	2422.86	0.116622	764.929	0.989971	1657.93	1.49322	0.673173	1.35079	C1C1	c1e1
26	19	C1C1 rho c1s1 d117	YPD	30	4	YPD_30	r26c19	2277.01	0.116156	699.17	0.994676	1577.84	1.68073	0.535991	1.57285	C1C1	c1s1
26	18	C1C1 rho c1s1 d117	YPD	30	4	YPD_30	r26c18	2293.63	0.11632	714.974	0.994837	1578.66	1.69299	0.536747	1.57366	C1C1	c1s1
26	21	C1C1 rho c1s1 d117	YPD	30	4	YPD_30	r26c21	2295.64	0.115979	709.402	0.994614	1586.24	1.69448	0.535173	1.58122	C1C1	c1s1
26	20	C1C1 rho c1s1 d117	YPD	30	4	YPD_30	r26c20	2332.91	0.117361	719.633	0.994479	1613.28	1.72199	0.541552	1.60817	C1C1	c1s1
27	22	C1C1 rho c1s1 d117	YPD	30	4	YPD_30	r27c22	2310.52	0.117701	698.14	0.994622	1612.38	1.70546	0.543121	1.60728	C1C1	c1s1
27	23	C1C1 rho c1s1 d117	YPD	30	4	YPD_30	r27c23	2238.78	0.118287	662.488	0.994728	1576.29	1.65251	0.545826	1.5713	C1C1	c1s1
27	18	C1C1 rho c1s1 d117	YPD	30	4	YPD_30	r27c18	2322.89	0.114529	735.086	0.994708	1587.8	1.71459	0.528486	1.58278	C1C1	c1s1
27	21	C1C1 rho c1s1 d117	YPD	30	4	YPD_30	r27c21	2325.67	0.115395	721.001	0.994317	1604.67	1.71664	0.532483	1.59959	C1C1	c1s1
27	20	C1C1 rho c1s1 d117	YPD	30	4	YPD_30	r27c20	2324.48	0.115573	718.115	0.994642	1606.36	1.71576	0.533303	1.60128	C1C1	c1s1
27	19	C1C1 rho c1s1 d117	YPD	30	4	YPD_30	r27c19	2302.79	0.116474	703.929	0.994514	1598.86	1.69976	0.537459	1.59381	C1C1	c1s1
26	23	C1C1 rho c1s1 d117	YPD	30	4	YPD_30	r26c23	2309.76	0.117581	711.369	0.9944	1598.39	1.7049	0.542569	1.59334	C1C1	c1s1
26	22	C1C1 rho c1s1 d117	YPD	30	4	YPD_30	r26c22	2280.41	0.116956	699.007	0.994429	1581.4	1.68324	0.539683	1.5764	C1C1	c1s1
19	18	C1C1 rho e1e4 pr57	YPD	30	6	YPD_30	r19c18	2353.74	0.0967597	715.016	0.991042	1638.72	1.61437	0.536937	1.56149	C1C1	e1e4
19	20	C1C1 rho e1e4 pr57	YPD	30	6	YPD_30	r19c20	2385.2	0.0942301	740.329	0.990825	1644.88	1.63595	0.5229	1.56735	C1C1	e1e4
19	19	C1C1 rho e1e4 pr57	YPD	30	6	YPD_30	r19c19	2347.25	0.0954895	711.562	0.991238	1635.69	1.60992	0.529888	1.5586	C1C1	e1e4
19	23	C1C1 rho e1e4 pr57	YPD	30	6	YPD_30	r19c23	2373.41	0.0957646	726.683	0.990964	1646.73	1.62786	0.531415	1.56912	C1C1	e1e4
19	22	C1C1 rho e1e4 pr57	YPD	30	6	YPD_30	r19c22	2331.57	0.0973708	710.89	0.991517	1620.68	1.59916	0.540328	1.5443	C1C1	e1e4
19	21	C1C1 rho e1e4 pr57	YPD	30	6	YPD_30	r19c21	2325.83	0.0974396	699.689	0.990673	1626.14	1.59522	0.54071	1.5495	C1C1	e1e4
18	22	C1C1 rho e1e4 pr57	YPD	30	6	YPD_30	r18c22	2311.99	0.0970115	699.004	0.991248	1612.99	1.58573	0.538334	1.53697	C1C1	e1e4
18	21	C1C1 rho e1e4 pr57	YPD	30	6	YPD_30	r18c21	2387.85	0.0954404	738.858	0.991564	1649	1.63776	0.529616	1.57128	C1C1	e1e4
18	23	C1C1 rho e1e4 pr57	YPD	30	6	YPD_30	r18c23	2363.91	0.0962337	722.107	0.991523	1641.8	1.62134	0.534018	1.56442	C1C1	e1e4
18	18	C1C1 rho e1e4 pr57	YPD	30	6	YPD_30	r18c18	2349.17	0.0973929	712.598	0.990944	1636.57	1.61123	0.540451	1.55944	C1C1	e1e4
18	20	C1C1 rho e1e4 pr57	YPD	30	6	YPD_30	r18c20	2349.5	0.0955344	715.624	0.991187	1633.88	1.61146	0.530137	1.55687	C1C1	e1e4
18	19	C1C1 rho e1e4 pr57	YPD	30	6	YPD_30	r18c19	2355.26	0.0958538	719.028	0.991192	1636.24	1.61541	0.53191	1.55912	C1C1	e1e4
15	28	C1C1 rho c1e1 pr40	YPEG	30	1	YPEG_30	r15c28	2761.93	0.0706722	378.996	0.998943	2382.94	1.87601	1.1629	1.86283	C1C1	c1e1
15	27	C1C1 rho c1e1 pr40	YPEG	30	1	YPEG_30	r15c27	2766.41	0.0704234	382.053	0.998973	2384.36	1.87906	1.15881	1.86394	C1C1	c1e1
15	26	C1C1 rho c1e1 pr40	YPEG	30	1	YPEG_30	r15c26	2706.55	0.0707045	367.487	0.998978	2339.06	1.83839	1.16343	1.82853	C1C1	c1e1
15	31	C1C1 rho c1e1 pr40	YPEG	30	1	YPEG_30	r15c31	2879.11	0.067125	406.605	0.998765	2472.51	1.9556	1.10454	1.93285	C1C1	c1e1
15	30	C1C1 rho c1e1 pr40	YPEG	30	1	YPEG_30	r15c30	2777.89	0.0691945	382.271	0.998827	2395.62	1.88685	1.13859	1.87275	C1C1	c1e1
15	29	C1C1 rho c1e1 pr40	YPEG	30	1	YPEG_30	r15c29	2784.26	0.0696324	388.583	0.99874	2395.68	1.89118	1.14579	1.87279	C1C1	c1e1
14	29	C1C1 rho c1e1 pr40	YPEG	30	1	YPEG_30	r14c29	2784.7	0.0690997	377.334	0.998797	2407.37	1.89148	1.13703	1.88193	C1C1	c1e1
14	28	C1C1 rho c1e1 pr40	YPEG	30	1	YPEG_30	r14c28	2824.1	0.0690841	397.743	0.998748	2426.36	1.91824	1.13677	1.89677	C1C1	c1e1
14	27	C1C1 rho c1e1 pr40	YPEG	30	1	YPEG_30	r14c27	2825.87	0.0696723	399.631	0.998953	2426.24	1.91944	1.14645	1.89668	C1C1	c1e1
14	26	C1C1 rho c1e1 pr40	YPEG	30	1	YPEG_30	r14c26	2724.69	0.0703135	370.827	0.999064	2353.87	1.85072	1.157	1.8401	C1C1	c1e1
14	31	C1C1 rho c1e1 pr40	YPEG	30	1	YPEG_30	r14c31	3019.27	0.0667566	427.35	0.998524	2591.92	2.05081	1.09847	2.0262	C1C1	c1e1
14	30	C1C1 rho c1e1 pr40	YPEG	30	1	YPEG_30	r14c30	2891.43	0.0686051	403.174	0.998732	2488.26	1.96397	1.12889	1.94516	C1C1	c1e1
15	18	C1C1 rho e1e4 pr45	YPEG	30	6	YPEG_30	r15c18	2666.85	0.065522	412.985	0.998307	2253.87	1.79088	1.05262	1.7277	C1C1	e1e4
15	23	C1C1 rho e1e4 pr45	YPEG	30	6	YPEG_30	r15c23	2655.84	0.0658808	412.535	0.998399	2243.31	1.78349	1.05839	1.7196	C1C1	e1e4
15	22	C1C1 rho e1e4 pr45	YPEG	30	6	YPEG_30	r15c22	2689.39	0.0655993	424.271	0.998398	2265.12	1.80602	1.05386	1.73632	C1C1	e1e4
15	21	C1C1 rho e1e4 pr45	YPEG	30	6	YPEG_30	r15c21	2672.26	0.0655367	420.337	0.998511	2251.92	1.79451	1.05286	1.7262	C1C1	e1e4
15	20	C1C1 rho e1e4 pr45	YPEG	30	6	YPEG_30	r15c20	2698.28	0.0651358	427.427	0.998613	2270.85	1.81198	1.04642	1.74071	C1C1	e1e4
15	19	C1C1 rho e1e4 pr45	YPEG	30	6	YPEG_30	r15c19	2607.54	0.0664483	391.341	0.998463	2216.19	1.75105	1.0675	1.69882	C1C1	e1e4
14	19	C1C1 rho e1e4 pr45	YPEG	30	6	YPEG_30	r14c19	2575.43	0.0665443	377.09	0.998401	2198.34	1.72949	1.06904	1.68513	C1C1	e1e4
14	18	C1C1 rho e1e4 pr45	YPEG	30	6	YPEG_30	r14c18	2603	0.0659804	392.999	0.998397	2210.01	1.74801	1.05999	1.69407	C1C1	e1e4
14	23	C1C1 rho e1e4 pr45	YPEG	30	6	YPEG_30	r14c23	2586.75	0.0656383	391.469	0.998632	2195.29	1.73709	1.05449	1.68279	C1C1	e1e4
14	22	C1C1 rho e1e4 pr45	YPEG	30	6	YPEG_30	r14c22	2597.49	0.0663527	389.117	0.998426	2208.38	1.7443	1.06597	1.69282	C1C1	e1e4
14	21	C1C1 rho e1e4 pr45	YPEG	30	6	YPEG_30	r14c21	2700.44	0.065061	422.762	0.998436	2277.68	1.81344	1.04522	1.74595	C1C1	e1e4
14	20	C1C1 rho e1e4 pr45	YPEG	30	6	YPEG_30	r14c20	2606.59	0.0659523	383.566	0.998658	2223.03	1.75042	1.05953	1.70405	C1C1	e1e4
14	23	C1C1 rho c1s1 d132	SOE	30	4	SOE_30	r14c23	1085.7	0.166175	419.099	0.999627	666.601	1.01055	1.22251	0.912013	C1C1	c1s1
14	18	C1C1 rho c1s1 d132	SOE	30	4	SOE_30	r14c18	1071.33	0.157474	431.234	0.999048	640.095	0.997172	1.15849	0.875749	C1C1	c1s1
14	19	C1C1 rho c1s1 d132	SOE	30	4	SOE_30	r14c19	1091.8	0.155664	444.908	0.998703	646.894	1.01623	1.14518	0.885052	C1C1	c1s1
14	20	C1C1 rho c1s1 d132	SOE	30	4	SOE_30	r14c20	1133.66	0.156165	468.821	0.998784	664.834	1.05518	1.14886	0.909596	C1C1	c1s1
14	21	C1C1 rho c1s1 d132	SOE	30	4	SOE_30	r14c21	1070.3	0.170862	400.475	0.999361	669.827	0.996216	1.25699	0.916426	C1C1	c1s1
14	22	C1C1 rho c1s1 d132	SOE	30	4	SOE_30	r14c22	1027.15	0.161551	388.878	0.999534	638.276	0.956054	1.18849	0.87326	C1C1	c1s1
15	21	C1C1 rho c1s1 d132	SOE	30	4	SOE_30	r15c21	1073.42	0.157325	434.901	0.998901	638.521	0.99912	1.1574	0.873595	C1C1	c1s1
15	22	C1C1 rho c1s1 d132	SOE	30	4	SOE_30	r15c22	1132.22	0.157042	465.255	0.999079	666.963	1.05385	1.15531	0.912508	C1C1	c1s1
15	23	C1C1 rho c1s1 d132	SOE	30	4	SOE_30	r15c23	1067.56	0.166969	409.336	0.999467	658.223	0.993663	1.22834	0.900551	C1C1	c1s1
15	18	C1C1 rho c1s1 d132	SOE	30	4	SOE_30	r15c18	1091.31	0.158186	447.139	0.998743	644.172	1.01577	1.16373	0.881327	C1C1	c1s1
15	19	C1C1 rho c1s1 d132	SOE	30	4	SOE_30	r15c19	1113.64	0.154372	461.729	0.998777	651.909	1.03655	1.13567	0.891912	C1C1	c1s1
15	20	C1C1 rho c1s1 d132	SOE	30	4	SOE_30	r15c20	1140.48	0.15191	483.188	0.998589	657.293	1.06154	1.11756	0.899279	C1C1	c1s1
30	18	C1C1 rho e1e4 pr87	YPD	30	5	YPD_30	r30c18	2392.81	0.100551	709.297	0.991372	1683.51	1.66659	0.53604	1.68689	C1C1	e1e4
30	21	C1C1 rho e1e4 pr87	YPD	30	5	YPD_30	r30c21	2439.62	0.101842	724.616	0.990798	1715	1.69919	0.542922	1.71844	C1C1	e1e4
30	20	C1C1 rho e1e4 pr87	YPD	30	5	YPD_30	r30c20	2323.56	0.105704	651.036	0.990329	1672.52	1.61836	0.56351	1.67588	C1C1	e1e4
30	19	C1C1 rho e1e4 pr87	YPD	30	5	YPD_30	r30c19	2410.36	0.102232	712.745	0.991272	1697.62	1.67882	0.545001	1.70102	C1C1	e1e4
30	23	C1C1 rho e1e4 pr87	YPD	30	5	YPD_30	r30c23	2344.15	0.107931	642.91	0.990013	1701.24	1.6327	0.575384	1.70465	C1C1	e1e4
30	22	C1C1 rho e1e4 pr87	YPD	30	5	YPD_30	r30c22	2395.68	0.103838	694.061	0.991852	1701.62	1.66859	0.55356	1.70504	C1C1	e1e4
26	10	C1C1 rho c1e1 pr74	SOE	30	1	SOE_30	r26c10	1103.69	0.153052	499.146	0.999281	604.549	1.03999	1.12025	0.843928	C1C1	c1e1
26	11	C1C1 rho c1e1 pr74	SOE	30	1	SOE_30	r26c11	1066.02	0.156685	477.913	0.99946	588.111	1.0045	1.14684	0.820982	C1C1	c1e1
26	12	C1C1 rho c1e1 pr74	SOE	30	1	SOE_30	r26c12	1094.3	0.1517	506.936	0.999585	587.364	1.03114	1.11036	0.819939	C1C1	c1e1
27	14	C1C1 rho c1e1 pr74	SOE	30	1	SOE_30	r27c14	1042.62	0.158256	454.304	0.999445	588.314	0.982441	1.15834	0.821266	C1C1	c1e1
27	15	C1C1 rho c1e1 pr74	SOE	30	1	SOE_30	r27c15	1089.01	0.155427	490.985	0.999025	598.026	1.02616	1.13763	0.834823	C1C1	c1e1
27	10	C1C1 rho c1e1 pr74	SOE	30	1	SOE_30	r27c10	1096.14	0.153538	491.556	0.999363	604.586	1.03288	1.12381	0.843981	C1C1	c1e1
27	11	C1C1 rho c1e1 pr74	SOE	30	1	SOE_30	r27c11	1094.92	0.152954	492.1	0.999411	602.817	1.03172	1.11953	0.841511	C1C1	c1e1
27	12	C1C1 rho c1e1 pr74	SOE	30	1	SOE_30	r27c12	1112.95	0.150881	508.118	0.999105	604.835	1.04872	1.10436	0.844328	C1C1	c1e1
27	13	C1C1 rho c1e1 pr74	SOE	30	1	SOE_30	r27c13	1103.89	0.156724	492.816	0.999467	611.074	1.04018	1.14713	0.853037	C1C1	c1e1
26	13	C1C1 rho c1e1 pr74	SOE	30	1	SOE_30	r26c13	1065.22	0.157475	477.005	0.99911	588.217	1.00374	1.15262	0.82113	C1C1	c1e1
26	14	C1C1 rho c1e1 pr74	SOE	30	1	SOE_30	r26c14	1105.36	0.157282	502.217	0.999535	603.142	1.04156	1.15121	0.841964	C1C1	c1e1
26	15	C1C1 rho c1e1 pr74	SOE	30	1	SOE_30	r26c15	1123.53	0.156106	515.968	0.999144	607.566	1.05869	1.1426	0.848141	C1C1	c1e1
11	37	C1C1 rho c1e1 pr35	SOE	37	2	SOE_37	r11c37	1140.44	0.219998	379.818	0.998241	760.623	1.11016	1.56935	1.07875	C1C1	c1e1
11	36	C1C1 rho c1e1 pr35	SOE	37	2	SOE_37	r11c36	1195.71	0.223939	397.337	0.998243	798.37	1.16396	1.59746	1.13229	C1C1	c1e1
11	39	C1C1 rho c1e1 pr35	SOE	37	2	SOE_37	r11c39	1052.89	0.228779	325.836	0.99814	727.057	1.02494	1.63199	1.03115	C1C1	c1e1
11	38	C1C1 rho c1e1 pr35	SOE	37	2	SOE_37	r11c38	1166.25	0.224095	389.56	0.997941	776.688	1.13529	1.59857	1.10154	C1C1	c1e1
10	39	C1C1 rho c1e1 pr35	SOE	37	2	SOE_37	r10c39	1140.31	0.224909	379.077	0.997951	761.234	1.11004	1.60438	1.07962	C1C1	c1e1
10	38	C1C1 rho c1e1 pr35	SOE	37	2	SOE_37	r10c38	1195.2	0.22568	410.654	0.998051	784.546	1.16347	1.60988	1.11268	C1C1	c1e1
11	34	C1C1 rho c1e1 pr35	SOE	37	2	SOE_37	r11c34	1192.49	0.225171	388.938	0.998085	803.554	1.16083	1.60625	1.13964	C1C1	c1e1
11	35	C1C1 rho c1e1 pr35	SOE	37	2	SOE_37	r11c35	1105.23	0.227937	347.524	0.998167	757.708	1.07589	1.62599	1.07462	C1C1	c1e1
10	34	C1C1 rho c1e1 pr35	SOE	37	2	SOE_37	r10c34	1181.61	0.223139	387.142	0.998581	794.472	1.15024	1.59176	1.12676	C1C1	c1e1
10	35	C1C1 rho c1e1 pr35	SOE	37	2	SOE_37	r10c35	1145.28	0.233189	353.684	0.99795	791.592	1.11487	1.66345	1.12267	C1C1	c1e1
10	37	C1C1 rho c1e1 pr35	SOE	37	2	SOE_37	r10c37	1053.12	0.233615	320.292	0.997394	732.825	1.02516	1.66649	1.03933	C1C1	c1e1
10	36	C1C1 rho c1e1 pr35	SOE	37	2	SOE_37	r10c36	1198.08	0.229198	387.842	0.997879	810.235	1.16627	1.63498	1.14911	C1C1	c1e1
26	21	C1C1 rho c1e1 pr75	SOE	37	1	SOE_37	r26c21	793.712	0.210339	146.511	0.99886	647.201	1.01413	1.50958	1.03606	C1C1	c1e1
26	20	C1C1 rho c1e1 pr75	SOE	37	1	SOE_37	r26c20	813.568	0.21275	158.981	0.998881	654.587	1.0395	1.52689	1.04788	C1C1	c1e1
26	22	C1C1 rho c1e1 pr75	SOE	37	1	SOE_37	r26c22	842.824	0.209702	161.559	0.998803	681.265	1.07688	1.50501	1.09059	C1C1	c1e1
26	23	C1C1 rho c1e1 pr75	SOE	37	1	SOE_37	r26c23	827.542	0.202735	164.055	0.998531	663.487	1.05735	1.45501	1.06213	C1C1	c1e1
26	19	C1C1 rho c1e1 pr75	SOE	37	1	SOE_37	r26c19	871.424	0.212525	178.744	0.998696	692.68	1.11342	1.52527	1.10886	C1C1	c1e1
26	18	C1C1 rho c1e1 pr75	SOE	37	1	SOE_37	r26c18	795.309	0.211882	150.896	0.99892	644.412	1.01617	1.52065	1.0316	C1C1	c1e1
27	23	C1C1 rho c1e1 pr75	SOE	37	1	SOE_37	r27c23	884.993	0.209667	171.517	0.998436	713.476	1.13076	1.50476	1.14215	C1C1	c1e1
27	22	C1C1 rho c1e1 pr75	SOE	37	1	SOE_37	r27c22	883.907	0.21169	171.203	0.998565	712.704	1.12937	1.51928	1.14092	C1C1	c1e1
27	21	C1C1 rho c1e1 pr75	SOE	37	1	SOE_37	r27c21	859.825	0.203781	171.14	0.9989	688.684	1.0986	1.46252	1.10247	C1C1	c1e1
27	19	C1C1 rho c1e1 pr75	SOE	37	1	SOE_37	r27c19	886.188	0.204332	191.977	0.998596	694.211	1.13228	1.46647	1.11131	C1C1	c1e1
27	20	C1C1 rho c1e1 pr75	SOE	37	1	SOE_37	r27c20	824.934	0.211987	161.892	0.999008	663.042	1.05402	1.52141	1.06142	C1C1	c1e1
27	18	C1C1 rho c1e1 pr75	SOE	37	1	SOE_37	r27c18	837.663	0.202331	173.304	0.999227	664.359	1.07028	1.45211	1.06353	C1C1	c1e1
23	31	C1C1 rho e1e4 pr64	SOE	37	5	SOE_37	r23c31	1104.76	0.171607	428.766	0.998032	675.998	1.06499	1.3407	0.982495	C1C1	e1e4
23	29	C1C1 rho e1e4 pr64	SOE	37	5	SOE_37	r23c29	1113.74	0.177965	448.568	0.999028	665.168	1.07364	1.39037	0.966755	C1C1	e1e4
23	30	C1C1 rho e1e4 pr64	SOE	37	5	SOE_37	r23c30	1087.95	0.177722	431.059	0.998061	656.891	1.04878	1.38847	0.954725	C1C1	e1e4
23	26	C1C1 rho e1e4 pr64	SOE	37	5	SOE_37	r23c26	1034.62	0.188196	386.703	0.998247	647.918	0.99737	1.4703	0.941683	C1C1	e1e4
23	28	C1C1 rho e1e4 pr64	SOE	37	5	SOE_37	r23c28	1081.48	0.17856	427.329	0.998911	654.15	1.04254	1.39502	0.950741	C1C1	e1e4
23	27	C1C1 rho e1e4 pr64	SOE	37	5	SOE_37	r23c27	1098.52	0.191227	423.512	0.998459	675.008	1.05897	1.49398	0.981056	C1C1	e1e4
22	30	C1C1 rho e1e4 pr64	SOE	37	5	SOE_37	r22c30	1009.74	0.198274	353.465	0.997555	656.271	0.973381	1.54904	0.953824	C1C1	e1e4
22	29	C1C1 rho e1e4 pr64	SOE	37	5	SOE_37	r22c29	1078.89	0.18369	417.008	0.998483	661.88	1.04004	1.4351	0.961976	C1C1	e1e4
22	31	C1C1 rho e1e4 pr64	SOE	37	5	SOE_37	r22c31	1047.9	0.181781	395.914	0.998574	651.985	1.01017	1.42018	0.947595	C1C1	e1e4
22	26	C1C1 rho e1e4 pr64	SOE	37	5	SOE_37	r22c26	1117.51	0.180169	446.235	0.998612	671.277	1.07728	1.40759	0.975634	C1C1	e1e4
22	28	C1C1 rho e1e4 pr64	SOE	37	5	SOE_37	r22c28	1047.49	0.192009	383.454	0.998666	664.04	1.00978	1.50009	0.965116	C1C1	e1e4
3	11	C1C1 rho c1e1 pr 2	YPEG	37	1	YPEG_37	r3c11	2893.15	0.0448076	365.457	0.99741	2527.7	2.32534	0.66112	2.36683	C1C1	c1e1
3	12	C1C1 rho c1e1 pr 2	YPEG	37	1	YPEG_37	r3c12	2796.62	0.0467081	360.38	0.997649	2436.24	2.24776	0.689161	2.28119	C1C1	c1e1
3	13	C1C1 rho c1e1 pr 2	YPEG	37	1	YPEG_37	r3c13	2776.37	0.047871	366.487	0.998119	2409.88	2.23148	0.706319	2.25651	C1C1	c1e1
3	14	C1C1 rho c1e1 pr 2	YPEG	37	1	YPEG_37	r3c14	2692.13	0.0482494	344.65	0.997978	2347.48	2.16377	0.711903	2.19808	C1C1	c1e1
3	15	C1C1 rho c1e1 pr 2	YPEG	37	1	YPEG_37	r3c15	2770.11	0.0489125	363.792	0.997911	2406.32	2.22645	0.721687	2.25318	C1C1	c1e1
3	43	C1C1 rho e1e4 pr12	SOE	37	6	SOE_37	r3c43	1141.61	0.158476	432.796	0.999359	708.812	1.13121	1.26913	1.0379	C1C1	e1e4
3	42	C1C1 rho e1e4 pr12	SOE	37	6	SOE_37	r3c42	1141.69	0.164472	428.832	0.999583	712.859	1.1313	1.31715	1.04383	C1C1	e1e4
3	45	C1C1 rho e1e4 pr12	SOE	37	6	SOE_37	r3c45	1146.79	0.152163	408.752	0.99926	738.033	1.13634	1.21858	1.08069	C1C1	e1e4
3	42	C1C1 rho e1e4 pr12	YPEG	37	6	YPEG_37	r3c42	3058.31	0.0512704	484.527	0.997641	2573.79	2.48458	0.761699	2.4437	C1C1	e1e4
3	44	C1C1 rho e1e4 pr12	YPEG	37	6	YPEG_37	r3c44	2913.41	0.04964	413.242	0.997679	2500.17	2.36686	0.737477	2.37381	C1C1	e1e4
3	43	C1C1 rho e1e4 pr12	YPEG	37	6	YPEG_37	r3c43	3075.14	0.0516173	479.583	0.997546	2595.56	2.49825	0.766853	2.46437	C1C1	e1e4
3	45	C1C1 rho e1e4 pr12	YPEG	37	6	YPEG_37	r3c45	3152.93	0.04924	471.824	0.997476	2681.11	2.56145	0.731534	2.5456	C1C1	e1e4
3	46	C1C1 rho e1e4 pr12	YPEG	37	6	YPEG_37	r3c46	3178.59	0.0494244	450.35	0.998185	2728.24	2.58229	0.734274	2.59035	C1C1	e1e4
3	15	C1C1 rho e1e4 pr8	YPEG	30	6	YPEG_30	r3c15	2937.85	0.0603126	386.154	0.998549	2551.7	1.97287	0.968931	1.956	C1C1	e1e4
3	14	C1C1 rho e1e4 pr8	YPEG	30	6	YPEG_30	r3c14	2894.59	0.0614473	362.831	0.998533	2531.76	1.94382	0.987161	1.94072	C1C1	e1e4
3	13	C1C1 rho e1e4 pr8	YPEG	30	6	YPEG_30	r3c13	2946.54	0.0610355	384.318	0.998612	2562.23	1.9787	0.980544	1.96407	C1C1	e1e4
3	12	C1C1 rho e1e4 pr8	YPEG	30	6	YPEG_30	r3c12	2999.09	0.059453	397.998	0.998509	2601.09	2.01399	0.955121	1.99386	C1C1	e1e4
3	11	C1C1 rho e1e4 pr8	YPEG	30	6	YPEG_30	r3c11	3048.49	0.0589601	384.503	0.998546	2663.99	2.04716	0.947203	2.04207	C1C1	e1e4
3	10	C1C1 rho e1e4 pr8	YPEG	30	6	YPEG_30	r3c10	3094.29	0.0589886	383.711	0.998663	2710.58	2.07792	0.94766	2.07778	C1C1	e1e4
6	26	C1C1 rho e1e4 pr16	YPD	30	5	YPD_30	r6c26	2268.65	0.103942	728.859	0.993978	1539.79	1.58011	0.554116	1.54288	C1C1	e1e4
6	29	C1C1 rho e1e4 pr16	YPD	30	5	YPD_30	r6c29	2261.43	0.102412	739.09	0.994306	1522.34	1.57508	0.545957	1.52539	C1C1	e1e4
6	28	C1C1 rho e1e4 pr16	YPD	30	5	YPD_30	r6c28	2262.62	0.103492	726.924	0.994431	1535.7	1.57591	0.551716	1.53878	C1C1	e1e4
6	27	C1C1 rho e1e4 pr16	YPD	30	5	YPD_30	r6c27	2312.1	0.102729	750.062	0.993882	1562.04	1.61037	0.547648	1.56517	C1C1	e1e4
6	31	C1C1 rho e1e4 pr16	YPD	30	5	YPD_30	r6c31	2291.59	0.100175	759.346	0.993767	1532.24	1.59609	0.534032	1.53531	C1C1	e1e4
6	30	C1C1 rho e1e4 pr16	YPD	30	5	YPD_30	r6c30	2278.01	0.102273	747.511	0.993958	1530.5	1.58663	0.545218	1.53357	C1C1	e1e4
7	26	C1C1 rho e1e4 pr16	YPD	30	5	YPD_30	r7c26	2269.78	0.10377	730.63	0.993753	1539.15	1.5809	0.5532	1.54224	C1C1	e1e4
7	29	C1C1 rho e1e4 pr16	YPD	30	5	YPD_30	r7c29	2261.9	0.103839	739.671	0.99397	1522.23	1.57541	0.553565	1.52529	C1C1	e1e4
7	28	C1C1 rho e1e4 pr16	YPD	30	5	YPD_30	r7c28	2267.69	0.10354	737.248	0.994193	1530.45	1.57945	0.551973	1.53352	C1C1	e1e4
7	27	C1C1 rho e1e4 pr16	YPD	30	5	YPD_30	r7c27	2293.65	0.103746	742.303	0.994283	1551.35	1.59752	0.553074	1.55446	C1C1	e1e4
7	31	C1C1 rho e1e4 pr16	YPD	30	5	YPD_30	r7c31	2281.9	0.105205	742.471	0.994385	1539.43	1.58934	0.56085	1.54252	C1C1	e1e4
7	30	C1C1 rho e1e4 pr16	YPD	30	5	YPD_30	r7c30	2264.83	0.102875	743.365	0.994281	1521.46	1.57745	0.548428	1.52451	C1C1	e1e4
19	23	C1C1 rho c1s1 d92	SOE	37	4	SOE_37	r19c23	1043.58	0.202134	419.505	0.998709	624.076	1.07421	1.53432	0.98243	C1C1	c1s1
19	18	C1C1 rho c1s1 d92	SOE	37	4	SOE_37	r19c18	1038.39	0.224792	381.947	0.997697	656.443	1.06886	1.70631	1.03338	C1C1	c1s1
19	22	C1C1 rho c1s1 d92	SOE	37	4	SOE_37	r19c22	1047.44	0.205339	415.488	0.998583	631.947	1.07817	1.55865	0.994821	C1C1	c1s1
19	20	C1C1 rho c1s1 d92	SOE	37	4	SOE_37	r19c20	1112.17	0.188892	481.399	0.999268	630.771	1.14481	1.43381	0.992969	C1C1	c1s1
19	21	C1C1 rho c1s1 d92	SOE	37	4	SOE_37	r19c21	1061.54	0.19301	441.997	0.998646	619.54	1.09269	1.46506	0.97529	C1C1	c1s1
18	22	C1C1 rho c1s1 d92	SOE	37	4	SOE_37	r18c22	1046.87	0.199948	419.264	0.998953	627.601	1.07759	1.51773	0.98798	C1C1	c1s1
18	23	C1C1 rho c1s1 d92	SOE	37	4	SOE_37	r18c23	1042.69	0.208383	403.811	0.998811	638.882	1.07329	1.58176	1.00574	C1C1	c1s1
18	19	C1C1 rho c1s1 d92	SOE	37	4	SOE_37	r18c19	1029.86	0.20272	402.993	0.998775	626.866	1.06008	1.53877	0.986823	C1C1	c1s1
18	18	C1C1 rho c1s1 d92	SOE	37	4	SOE_37	r18c18	1008.73	0.223492	361.166	0.998333	647.562	1.03833	1.69644	1.0194	C1C1	c1s1
18	21	C1C1 rho c1s1 d92	SOE	37	4	SOE_37	r18c21	990.239	0.212523	364.132	0.998738	626.107	1.0193	1.61318	0.985628	C1C1	c1s1
18	20	C1C1 rho c1s1 d92	SOE	37	4	SOE_37	r18c20	979.093	0.218069	349.46	0.998663	629.633	1.00782	1.65528	0.991178	C1C1	c1s1
23	43	C1C1 rho c1e1 pr72	SOE	30	2	SOE_30	r23c43	1003.11	0.217413	294.637	0.99752	708.472	0.890584	1.38461	0.882461	C1C1	c1e1
23	44	C1C1 rho c1e1 pr72	SOE	30	2	SOE_30	r23c44	1193.55	0.202359	404.605	0.997628	788.94	1.05966	1.28873	0.98269	C1C1	c1e1
23	45	C1C1 rho c1e1 pr72	SOE	30	2	SOE_30	r23c45	1112.09	0.193018	357.662	0.997055	754.427	0.987339	1.22924	0.939701	C1C1	c1e1
23	46	C1C1 rho c1e1 pr72	SOE	30	2	SOE_30	r23c46	1234.12	0.166367	425.007	0.99724	809.108	1.09568	1.05952	1.00781	C1C1	c1e1
23	42	C1C1 rho c1e1 pr72	SOE	30	2	SOE_30	r23c42	1182.08	0.197699	414.546	0.9978	767.538	1.04948	1.25906	0.956032	C1C1	c1e1
22	45	C1C1 rho c1e1 pr72	SOE	30	2	SOE_30	r22c45	1163.22	0.193876	389.591	0.996995	773.634	1.03274	1.23471	0.963625	C1C1	c1e1
22	46	C1C1 rho c1e1 pr72	SOE	30	2	SOE_30	r22c46	1267.37	0.172883	431.683	0.997046	835.688	1.1252	1.10101	1.04092	C1C1	c1e1
22	43	C1C1 rho c1e1 pr72	SOE	30	2	SOE_30	r22c43	1136.47	0.209677	370.772	0.997319	765.701	1.00899	1.33534	0.953743	C1C1	c1e1
22	44	C1C1 rho c1e1 pr72	SOE	30	2	SOE_30	r22c44	1163.54	0.201986	391.355	0.997281	772.185	1.03302	1.28636	0.96182	C1C1	c1e1
22	42	C1C1 rho c1e1 pr72	SOE	30	2	SOE_30	r22c42	1146.75	0.216458	379.303	0.997727	767.443	1.01811	1.37852	0.955913	C1C1	c1e1
30	18	C1C1 rho C1 control 2	YPD	30	3	YPD_30	r30c18	2454.67	0.111017	705.561	0.992602	1749.11	1.69525	0.615358	1.71053	C1C1	c1
30	21	C1C1 rho C1 control 2	YPD	30	3	YPD_30	r30c21	2531.19	0.109384	736.321	0.992433	1794.87	1.7481	0.606304	1.75528	C1C1	c1
30	20	C1C1 rho C1 control 2	YPD	30	3	YPD_30	r30c20	2447.73	0.110545	696.117	0.992266	1751.61	1.69046	0.612741	1.71298	C1C1	c1
30	19	C1C1 rho C1 control 2	YPD	30	3	YPD_30	r30c19	2502.69	0.108443	735.323	0.992744	1767.37	1.72842	0.601091	1.72839	C1C1	c1
30	23	C1C1 rho C1 control 2	YPD	30	3	YPD_30	r30c23	2484.91	0.110843	701.933	0.992344	1782.97	1.71613	0.614394	1.74365	C1C1	c1
30	22	C1C1 rho C1 control 2	YPD	30	3	YPD_30	r30c22	2547.52	0.110316	738.38	0.992361	1809.14	1.75938	0.611472	1.76924	C1C1	c1
22	6	C1C1 rho e1e4 pr67	SOE	37	6	SOE_37	r22c6	1043.27	0.163378	443.357	0.999183	599.916	1.03377	1.30839	0.878447	C1C1	e1e4
22	5	C1C1 rho e1e4 pr67	SOE	37	6	SOE_37	r22c5	1091.28	0.156623	453.727	0.998886	637.552	1.08134	1.25429	0.933557	C1C1	e1e4
22	4	C1C1 rho e1e4 pr67	SOE	37	6	SOE_37	r22c4	1049.02	0.171633	367.712	0.997195	681.303	1.03946	1.3745	0.99762	C1C1	e1e4
22	3	C1C1 rho e1e4 pr67	SOE	37	6	SOE_37	r22c3	1132.95	0.15239	394.899	0.998142	738.049	1.12263	1.22039	1.08071	C1C1	e1e4
23	5	C1C1 rho e1e4 pr67	SOE	37	6	SOE_37	r23c5	1043.77	0.162407	416.379	0.999114	627.387	1.03426	1.30061	0.918672	C1C1	e1e4
23	7	C1C1 rho e1e4 pr67	SOE	37	6	SOE_37	r23c7	1001.88	0.166145	414.036	0.999219	587.848	0.99276	1.33055	0.860775	C1C1	e1e4
23	6	C1C1 rho e1e4 pr67	SOE	37	6	SOE_37	r23c6	1041.55	0.160701	447.015	0.99902	594.532	1.03206	1.28695	0.870563	C1C1	e1e4
23	3	C1C1 rho e1e4 pr67	SOE	37	6	SOE_37	r23c3	1088.33	0.157893	361.163	0.997506	727.166	1.07842	1.26447	1.06478	C1C1	e1e4
23	4	C1C1 rho e1e4 pr67	SOE	37	6	SOE_37	r23c4	1088.29	0.148629	444.141	0.999396	644.154	1.07838	1.19027	0.943224	C1C1	e1e4
7	22	C1C1 rho c1e1 pr21	SOE	30	2	SOE_30	r7c22	1202.51	0.200028	391.076	0.998521	811.432	1.06761	1.27388	1.01071	C1C1	c1e1
7	23	C1C1 rho c1e1 pr21	SOE	30	2	SOE_30	r7c23	1137.8	0.20098	359.69	0.998665	778.107	1.01016	1.27995	0.969196	C1C1	c1e1
7	19	C1C1 rho c1e1 pr21	SOE	30	2	SOE_30	r7c19	1112.3	0.20198	337.611	0.997663	774.689	0.987526	1.28632	0.964939	C1C1	c1e1
7	20	C1C1 rho c1e1 pr21	SOE	30	2	SOE_30	r7c20	1160.76	0.200358	369.396	0.998306	791.368	1.03055	1.27599	0.985714	C1C1	c1e1
7	21	C1C1 rho c1e1 pr21	SOE	30	2	SOE_30	r7c21	1159.95	0.204393	369.161	0.998109	790.787	1.02983	1.30168	0.98499	C1C1	c1e1
7	18	C1C1 rho c1e1 pr21	SOE	30	2	SOE_30	r7c18	1175.42	0.196733	374.695	0.998481	800.723	1.04356	1.2529	0.997367	C1C1	c1e1
6	20	C1C1 rho c1e1 pr21	SOE	30	2	SOE_30	r6c20	1147.04	0.209986	348.967	0.997867	798.07	1.01837	1.33731	0.994062	C1C1	c1e1
6	21	C1C1 rho c1e1 pr21	SOE	30	2	SOE_30	r6c21	1093.12	0.200437	330.749	0.998201	762.375	0.970501	1.27649	0.9496	C1C1	c1e1
6	22	C1C1 rho c1e1 pr21	SOE	30	2	SOE_30	r6c22	1139.73	0.208208	342.614	0.998232	797.12	1.01188	1.32598	0.992879	C1C1	c1e1
6	23	C1C1 rho c1e1 pr21	SOE	30	2	SOE_30	r6c23	1159.61	0.210574	353.603	0.998043	806.002	1.02952	1.34105	1.00394	C1C1	c1e1
6	18	C1C1 rho c1e1 pr21	SOE	30	2	SOE_30	r6c18	1154.25	0.207128	353.996	0.998079	800.252	1.02477	1.3191	0.99678	C1C1	c1e1
6	19	C1C1 rho c1e1 pr21	SOE	30	2	SOE_30	r6c19	1140.89	0.207968	346.032	0.998048	794.857	1.01291	1.32446	0.99006	C1C1	c1e1
26	6	C1C1 rho c1e4 pr7	SOE	37	3	SOE_37	r26c6	1050.17	0.189877	422.984	0.998613	627.185	1.04676	1.43937	0.925191	C1C1	c1e4
26	5	C1C1 rho c1e4 pr7	SOE	37	3	SOE_37	r26c5	1013.61	0.190258	382.63	0.997857	630.98	1.01032	1.44226	0.93079	C1C1	c1e4
27	7	C1C1 rho c1e4 pr7	SOE	37	3	SOE_37	r27c7	1022.34	0.177921	435.484	0.998289	586.852	1.01902	1.34874	0.865695	C1C1	c1e4
27	6	C1C1 rho c1e4 pr7	SOE	37	3	SOE_37	r27c6	1019.92	0.174256	435.362	0.998563	584.558	1.01661	1.32096	0.86231	C1C1	c1e4
26	7	C1C1 rho c1e4 pr7	SOE	37	3	SOE_37	r26c7	1006.83	0.194069	398.57	0.998336	608.264	1.00356	1.47115	0.897281	C1C1	c1e4
27	3	C1C1 rho c1e4 pr7	SOE	37	3	SOE_37	r27c3	1132.81	0.143504	442.814	0.998998	689.996	1.12913	1.08784	1.01785	C1C1	c1e4
27	4	C1C1 rho c1e4 pr7	SOE	37	3	SOE_37	r27c4	1080.71	0.162908	436.56	0.998722	644.146	1.0772	1.23494	0.950212	C1C1	c1e4
26	4	C1C1 rho c1e4 pr7	SOE	37	3	SOE_37	r26c4	1099.34	0.160289	447.755	0.998406	651.587	1.09577	1.21508	0.961188	C1C1	c1e4
26	3	C1C1 rho c1e4 pr7	SOE	37	3	SOE_37	r26c3	1163.09	0.140693	461.82	0.998891	701.273	1.15932	1.06653	1.03448	C1C1	c1e4
27	5	C1C1 rho c1e4 pr7	SOE	37	3	SOE_37	r27c5	1092.12	0.163571	477.689	0.998931	614.434	1.08858	1.23996	0.906383	C1C1	c1e4
10	46	C1C1 rho c1e4 pr18	YPEG	30	3	YPEG_30	r10c46	3148.28	0.0571089	525.705	0.999885	2622.58	2.08976	0.901675	2.0197	C1C1	c1e4
10	45	C1C1 rho c1e4 pr18	YPEG	30	3	YPEG_30	r10c45	3025.47	0.0580411	522.053	0.999827	2503.41	2.00824	0.916393	1.92793	C1C1	c1e4
10	44	C1C1 rho c1e4 pr18	YPEG	30	3	YPEG_30	r10c44	2920.73	0.0600477	524.886	0.999854	2395.85	1.93872	0.948075	1.84509	C1C1	c1e4
10	43	C1C1 rho c1e4 pr18	YPEG	30	3	YPEG_30	r10c43	2867.2	0.0616996	527.989	0.999821	2339.21	1.90318	0.974156	1.80148	C1C1	c1e4
10	42	C1C1 rho c1e4 pr18	YPEG	30	3	YPEG_30	r10c42	2746.33	0.063291	484.378	0.999794	2261.96	1.82295	0.999283	1.74198	C1C1	c1e4
11	43	C1C1 rho c1e4 pr18	YPEG	30	3	YPEG_30	r11c43	2834.25	0.0620145	511.386	0.999854	2322.86	1.88131	0.979128	1.78888	C1C1	c1e4
11	42	C1C1 rho c1e4 pr18	YPEG	30	3	YPEG_30	r11c42	2817.76	0.0633451	515.873	0.999869	2301.89	1.87036	1.00014	1.77273	C1C1	c1e4
11	46	C1C1 rho c1e4 pr18	YPEG	30	3	YPEG_30	r11c46	3181.69	0.0575644	533.304	0.999906	2648.39	2.11193	0.908866	2.03958	C1C1	c1e4
11	45	C1C1 rho c1e4 pr18	YPEG	30	3	YPEG_30	r11c45	3034.99	0.0587162	540.875	0.999895	2494.11	2.01455	0.927052	1.92077	C1C1	c1e4
11	44	C1C1 rho c1e4 pr18	YPEG	30	3	YPEG_30	r11c44	2902.27	0.0599333	525.437	0.999869	2376.84	1.92646	0.946269	1.83045	C1C1	c1e4
15	19	C1C1 rho e1e4 pr39	YPD	30	5	YPD_30	r15c19	2411.29	0.0955578	750.728	0.99119	1660.56	1.67946	0.50942	1.66389	C1C1	e1e4
15	18	C1C1 rho e1e4 pr39	YPD	30	5	YPD_30	r15c18	2406.26	0.0938775	752.808	0.991093	1653.45	1.67596	0.500462	1.65677	C1C1	e1e4
15	21	C1C1 rho e1e4 pr39	YPD	30	5	YPD_30	r15c21	2361.55	0.0958382	734.582	0.991627	1626.97	1.64482	0.510915	1.63023	C1C1	e1e4
15	20	C1C1 rho e1e4 pr39	YPD	30	5	YPD_30	r15c20	2369.58	0.094724	732.48	0.991185	1637.1	1.65041	0.504975	1.64039	C1C1	e1e4
15	23	C1C1 rho e1e4 pr39	YPD	30	5	YPD_30	r15c23	2399.95	0.0935942	751.208	0.991489	1648.74	1.67156	0.498952	1.65205	C1C1	e1e4
15	22	C1C1 rho e1e4 pr39	YPD	30	5	YPD_30	r15c22	2424.66	0.0941434	761.784	0.991043	1662.88	1.68878	0.50188	1.66621	C1C1	e1e4
14	18	C1C1 rho e1e4 pr39	YPD	30	5	YPD_30	r14c18	2358.4	0.0960724	722.417	0.991011	1635.98	1.64262	0.512163	1.63927	C1C1	e1e4
14	20	C1C1 rho e1e4 pr39	YPD	30	5	YPD_30	r14c20	2384.39	0.0952648	731.444	0.990843	1652.95	1.66073	0.507858	1.65626	C1C1	e1e4
14	19	C1C1 rho e1e4 pr39	YPD	30	5	YPD_30	r14c19	2393.52	0.0940281	741.364	0.990768	1652.15	1.66708	0.501265	1.65547	C1C1	e1e4
14	22	C1C1 rho e1e4 pr39	YPD	30	5	YPD_30	r14c22	2355.67	0.0954427	717.696	0.990705	1637.97	1.64072	0.508806	1.64126	C1C1	e1e4
14	21	C1C1 rho e1e4 pr39	YPD	30	5	YPD_30	r14c21	2414.92	0.0941412	752.347	0.990796	1662.58	1.68199	0.501868	1.66591	C1C1	e1e4
14	23	C1C1 rho e1e4 pr39	YPD	30	5	YPD_30	r14c23	2391.07	0.095808	741.114	0.99099	1649.96	1.66538	0.510754	1.65327	C1C1	e1e4
26	19	C1C1 rho c1e1 pr81	YPD	30	2	YPD_30	r26c19	2278.38	0.11844	669.57	0.994955	1608.81	1.59274	0.595257	1.46289	C1C1	c1e1
26	18	C1C1 rho c1e1 pr81	YPD	30	2	YPD_30	r26c18	2310.92	0.117357	690.915	0.994812	1620.01	1.61549	0.589813	1.47308	C1C1	c1e1
26	21	C1C1 rho c1e1 pr81	YPD	30	2	YPD_30	r26c21	2287.17	0.1171	680.61	0.994783	1606.56	1.59889	0.588519	1.46085	C1C1	c1e1
26	20	C1C1 rho c1e1 pr81	YPD	30	2	YPD_30	r26c20	2320.57	0.116174	704.579	0.994755	1616	1.62224	0.583867	1.46943	C1C1	c1e1
26	23	C1C1 rho c1e1 pr81	YPD	30	2	YPD_30	r26c23	2296.73	0.117147	705.388	0.99453	1591.35	1.60557	0.588759	1.44702	C1C1	c1e1
26	22	C1C1 rho c1e1 pr81	YPD	30	2	YPD_30	r26c22	2253.82	0.119083	671.089	0.994099	1582.73	1.57558	0.598485	1.43919	C1C1	c1e1
27	23	C1C1 rho c1e1 pr81	YPD	30	2	YPD_30	r27c23	2219.79	0.116042	655.76	0.994253	1564.03	1.55179	0.583201	1.42218	C1C1	c1e1
27	18	C1C1 rho c1e1 pr81	YPD	30	2	YPD_30	r27c18	2345.27	0.116346	707.46	0.994928	1637.81	1.63951	0.584729	1.48927	C1C1	c1e1
27	21	C1C1 rho c1e1 pr81	YPD	30	2	YPD_30	r27c21	2326.3	0.116012	698.842	0.994633	1627.45	1.62624	0.583051	1.47985	C1C1	c1e1
27	20	C1C1 rho c1e1 pr81	YPD	30	2	YPD_30	r27c20	2308.65	0.118063	686.474	0.994875	1622.18	1.61391	0.593362	1.47505	C1C1	c1e1
27	19	C1C1 rho c1e1 pr81	YPD	30	2	YPD_30	r27c19	2287.66	0.115574	681.383	0.995071	1606.28	1.59923	0.580853	1.4606	C1C1	c1e1
27	22	C1C1 rho c1e1 pr81	YPD	30	2	YPD_30	r27c22	2276.49	0.117366	675.607	0.994447	1600.89	1.59143	0.589858	1.45569	C1C1	c1e1
27	43	C1C1 rho c1e1 pr84	YPEG	30	2	YPEG_30	r27c43	2945.69	0.0623676	513.657	0.999385	2432.04	2.09668	1.00331	1.98412	C1C1	c1e1
27	42	C1C1 rho c1e1 pr84	YPEG	30	2	YPEG_30	r27c42	2839.38	0.0648959	482.766	0.998868	2356.62	2.02101	1.04398	1.92259	C1C1	c1e1
26	44	C1C1 rho c1e1 pr84	YPEG	30	2	YPEG_30	r26c44	3007.59	0.0611066	532.73	0.9996	2474.86	2.14074	0.983022	2.01906	C1C1	c1e1
26	43	C1C1 rho c1e1 pr84	YPEG	30	2	YPEG_30	r26c43	2905.82	0.0638444	518.584	0.999347	2387.24	2.0683	1.02707	1.94758	C1C1	c1e1
26	42	C1C1 rho c1e1 pr84	YPEG	30	2	YPEG_30	r26c42	2906.09	0.0645004	521.273	0.999438	2384.82	2.0685	1.03762	1.9456	C1C1	c1e1
26	46	C1C1 rho c1e1 pr84	YPEG	30	2	YPEG_30	r26c46	3178.82	0.0611455	492.942	0.999007	2685.88	2.26262	0.983648	2.19122	C1C1	c1e1
26	45	C1C1 rho c1e1 pr84	YPEG	30	2	YPEG_30	r26c45	3042.27	0.0605112	504.27	0.999179	2538	2.16543	0.973443	2.07057	C1C1	c1e1
27	46	C1C1 rho c1e1 pr84	YPEG	30	2	YPEG_30	r27c46	3129.62	0.0615142	481.444	0.998697	2648.18	2.2276	0.989579	2.16046	C1C1	c1e1
27	45	C1C1 rho c1e1 pr84	YPEG	30	2	YPEG_30	r27c45	3038.41	0.0615992	482.175	0.998549	2556.23	2.16267	0.990947	2.08544	C1C1	c1e1
27	44	C1C1 rho c1e1 pr84	YPEG	30	2	YPEG_30	r27c44	2967.32	0.061989	503.053	0.999293	2464.27	2.11208	0.997218	2.01042	C1C1	c1e1
26	15	C1C1 rho e1e4 pr80	SOE	37	6	SOE_37	r26c15	1058.85	0.175473	450.016	0.999017	608.831	1.0492	1.40525	0.891501	C1C1	e1e4
27	14	C1C1 rho e1e4 pr80	SOE	37	6	SOE_37	r27c14	1037.4	0.173852	434.453	0.998954	602.948	1.02795	1.39227	0.882886	C1C1	e1e4
27	15	C1C1 rho e1e4 pr80	SOE	37	6	SOE_37	r27c15	1082.27	0.172174	467.479	0.998592	614.793	1.07242	1.37883	0.90023	C1C1	e1e4
27	10	C1C1 rho e1e4 pr80	SOE	37	6	SOE_37	r27c10	1051.69	0.16946	465.102	0.999132	586.589	1.04211	1.35709	0.858931	C1C1	e1e4
27	11	C1C1 rho e1e4 pr80	SOE	37	6	SOE_37	r27c11	1037.86	0.172062	443.229	0.999013	594.63	1.02841	1.37793	0.870706	C1C1	e1e4
27	13	C1C1 rho e1e4 pr80	SOE	37	6	SOE_37	r27c13	1065.73	0.16932	467.769	0.99901	597.966	1.05603	1.35597	0.875591	C1C1	e1e4
27	12	C1C1 rho e1e4 pr80	SOE	37	6	SOE_37	r27c12	1035.83	0.168783	449.552	0.999112	586.274	1.02639	1.35167	0.858471	C1C1	e1e4
26	14	C1C1 rho e1e4 pr80	SOE	37	6	SOE_37	r26c14	1069.11	0.171654	466.699	0.999389	602.41	1.05937	1.37467	0.882099	C1C1	e1e4
26	13	C1C1 rho e1e4 pr80	SOE	37	6	SOE_37	r26c13	1036.26	0.179431	436.168	0.998606	600.091	1.02682	1.43695	0.878703	C1C1	e1e4
26	10	C1C1 rho e1e4 pr80	SOE	37	6	SOE_37	r26c10	1054.24	0.171125	462.412	0.998591	591.827	1.04464	1.37043	0.866602	C1C1	e1e4
26	12	C1C1 rho e1e4 pr80	SOE	37	6	SOE_37	r26c12	1044.32	0.173446	452.969	0.999113	591.348	1.03481	1.38901	0.865901	C1C1	e1e4
26	11	C1C1 rho e1e4 pr80	SOE	37	6	SOE_37	r26c11	1036.2	0.171576	440.677	0.998978	595.524	1.02677	1.37404	0.872016	C1C1	e1e4
11	20	C1C1 rho c1e4 pr33	YPD	37	3	YPD_37	r11c20	2215.24	0.106007	765.771	0.988363	1449.47	1.38355	0.635649	1.21597	C1C1	c1e4
11	22	C1C1 rho c1e4 pr33	YPD	37	3	YPD_37	r11c22	2222.52	0.107041	764.58	0.987944	1457.93	1.38809	0.641847	1.22307	C1C1	c1e4
11	21	C1C1 rho c1e4 pr33	YPD	37	3	YPD_37	r11c21	2241.52	0.106041	778.801	0.988637	1462.72	1.39996	0.635848	1.22708	C1C1	c1e4
11	19	C1C1 rho c1e4 pr33	YPD	37	3	YPD_37	r11c19	2200.1	0.106893	755.668	0.988232	1444.43	1.37409	0.640962	1.21175	C1C1	c1e4
11	18	C1C1 rho c1e4 pr33	YPD	37	3	YPD_37	r11c18	2167.16	0.108096	735.236	0.987931	1431.92	1.35352	0.648174	1.20125	C1C1	c1e4
10	20	C1C1 rho c1e4 pr33	YPD	37	3	YPD_37	r10c20	2182.33	0.107062	739.211	0.988452	1443.12	1.36299	0.641974	1.21065	C1C1	c1e4
10	19	C1C1 rho c1e4 pr33	YPD	37	3	YPD_37	r10c19	2150.15	0.107482	718.938	0.988435	1431.21	1.34289	0.644491	1.20066	C1C1	c1e4
10	21	C1C1 rho c1e4 pr33	YPD	37	3	YPD_37	r10c21	2228.25	0.107227	768.323	0.988706	1459.92	1.39167	0.642962	1.22474	C1C1	c1e4
10	18	C1C1 rho c1e4 pr33	YPD	37	3	YPD_37	r10c18	2203.69	0.106475	755.986	0.988381	1447.71	1.37633	0.638451	1.21449	C1C1	c1e4
10	22	C1C1 rho c1e4 pr33	YPD	37	3	YPD_37	r10c22	2244.54	0.106513	774.611	0.988916	1469.93	1.40184	0.63868	1.23313	C1C1	c1e4
10	23	C1C1 rho c1e4 pr33	YPD	37	3	YPD_37	r10c23	2223.49	0.10593	757.501	0.989156	1465.99	1.3887	0.635188	1.22983	C1C1	c1e4
11	23	C1C1 rho c1e4 pr33	YPD	37	3	YPD_37	r11c23	2217.67	0.106543	764.426	0.988465	1453.24	1.38506	0.638863	1.21914	C1C1	c1e4
22	6	C1C1 rho c1e1 pr61	SOE	37	1	SOE_37	r22c6	755.948	0.202346	161.425	0.998782	594.523	0.965876	1.45221	0.951731	C1C1	c1e1
22	3	C1C1 rho c1e1 pr61	SOE	37	1	SOE_37	r22c3	856.087	0.1665	174.726	0.998692	681.362	1.09382	1.19495	1.09074	C1C1	c1e1
22	5	C1C1 rho c1e1 pr61	SOE	37	1	SOE_37	r22c5	790.243	0.192897	172.954	0.998929	617.289	1.00969	1.3844	0.988176	C1C1	c1e1
22	4	C1C1 rho c1e1 pr61	SOE	37	1	SOE_37	r22c4	837.115	0.184827	179.736	0.99859	657.379	1.06958	1.32649	1.05235	C1C1	c1e1
23	6	C1C1 rho c1e1 pr61	SOE	37	1	SOE_37	r23c6	857.887	0.205603	195.579	0.999171	662.308	1.09612	1.47559	1.06024	C1C1	c1e1
23	5	C1C1 rho c1e1 pr61	SOE	37	1	SOE_37	r23c5	726.409	0.194021	149.847	0.998811	576.562	0.928133	1.39247	0.922978	C1C1	c1e1
23	7	C1C1 rho c1e1 pr61	SOE	37	1	SOE_37	r23c7	731.42	0.202596	159.075	0.999052	572.346	0.934536	1.45401	0.916229	C1C1	c1e1
23	3	C1C1 rho c1e1 pr61	SOE	37	1	SOE_37	r23c3	860.148	0.16795	171.624	0.998925	688.524	1.09901	1.20536	1.10221	C1C1	c1e1
23	4	C1C1 rho c1e1 pr61	SOE	37	1	SOE_37	r23c4	730.06	0.191684	131.704	0.998313	598.356	0.932799	1.3757	0.957867	C1C1	c1e1
22	7	C1C1 rho c1e1 pr61	SOE	37	1	SOE_37	r22c7	812.561	0.214839	179.571	0.999298	632.99	1.03821	1.54188	1.01331	C1C1	c1e1
3	21	C1C1 rho c1e1 pr 3	SOE	30	1	SOE_30	r3c21	1183.55	0.142695	355.277	0.989721	828.273	1.11524	1.04444	1.15624	C1C1	c1e1
3	22	C1C1 rho c1e1 pr 3	SOE	30	1	SOE_30	r3c22	1240.78	0.118703	442.601	0.99544	798.175	1.16916	0.868839	1.11422	C1C1	c1e1
3	23	C1C1 rho c1e1 pr 3	SOE	30	1	SOE_30	r3c23	1212.19	0.124978	418.42	0.987151	793.773	1.14223	0.914761	1.10808	C1C1	c1e1
3	18	C1C1 rho c1e1 pr 3	SOE	30	1	SOE_30	r3c18	1174.02	0.139048	406.748	0.993729	767.27	1.10626	1.01775	1.07108	C1C1	c1e1
3	19	C1C1 rho c1e1 pr 3	SOE	30	1	SOE_30	r3c19	1233.48	0.122412	423.412	0.990068	810.067	1.16229	0.895983	1.13082	C1C1	c1e1
3	20	C1C1 rho c1e1 pr 3	SOE	30	1	SOE_30	r3c20	1249.83	0.119514	446.614	0.996675	803.214	1.17769	0.87477	1.12126	C1C1	c1e1
22	37	C1C1 rho c1s1 d97	YPD	37	4	YPD_37	r22c37	2315.01	0.108193	820.377	0.991833	1494.63	1.46643	0.636558	1.25637	C1C1	c1s1
22	36	C1C1 rho c1s1 d97	YPD	37	4	YPD_37	r22c36	2190.5	0.111571	730.203	0.990072	1460.3	1.38756	0.656432	1.22751	C1C1	c1s1
22	38	C1C1 rho c1s1 d97	YPD	37	4	YPD_37	r22c38	2262.22	0.108144	784.948	0.991211	1477.27	1.43299	0.636267	1.24178	C1C1	c1s1
22	34	C1C1 rho c1s1 d97	YPD	37	4	YPD_37	r22c34	2245.84	0.1075	784.077	0.991413	1461.76	1.42261	0.63248	1.22874	C1C1	c1s1
22	35	C1C1 rho c1s1 d97	YPD	37	4	YPD_37	r22c35	2318.35	0.106186	818.28	0.99118	1500.07	1.46854	0.624747	1.26094	C1C1	c1s1
22	39	C1C1 rho c1s1 d97	YPD	37	4	YPD_37	r22c39	2272.72	0.106506	799.316	0.991404	1473.41	1.43964	0.62663	1.23853	C1C1	c1s1
23	39	C1C1 rho c1s1 d97	YPD	37	4	YPD_37	r23c39	2281.7	0.106068	805.709	0.991832	1475.99	1.44533	0.624052	1.24069	C1C1	c1s1
23	37	C1C1 rho c1s1 d97	YPD	37	4	YPD_37	r23c37	2237.55	0.108746	774.434	0.991325	1463.12	1.41736	0.639808	1.22988	C1C1	c1s1
23	38	C1C1 rho c1s1 d97	YPD	37	4	YPD_37	r23c38	2260.03	0.106452	789.049	0.991327	1470.98	1.4316	0.62631	1.23649	C1C1	c1s1
23	35	C1C1 rho c1s1 d97	YPD	37	4	YPD_37	r23c35	2251.47	0.109067	764.568	0.990665	1486.9	1.42618	0.641696	1.24987	C1C1	c1s1
23	34	C1C1 rho c1s1 d97	YPD	37	4	YPD_37	r23c34	2402.71	0.106863	847.263	0.990817	1555.45	1.52198	0.628728	1.30749	C1C1	c1s1
23	36	C1C1 rho c1s1 d97	YPD	37	4	YPD_37	r23c36	2243.15	0.108169	777.839	0.991072	1465.31	1.42091	0.636412	1.23172	C1C1	c1s1
26	29	C1C1 rho c1e1 pr76	YPD	37	1	YPD_37	r26c29	2323.2	0.106459	803.921	0.989666	1519.28	1.58102	0.601394	1.42371	C1C1	c1e1
26	30	C1C1 rho c1e1 pr76	YPD	37	1	YPD_37	r26c30	2341.44	0.106008	804.711	0.989259	1536.73	1.59344	0.598846	1.44007	C1C1	c1e1
26	26	C1C1 rho c1e1 pr76	YPD	37	1	YPD_37	r26c26	2274.51	0.109455	785.767	0.989411	1488.74	1.54789	0.61832	1.39509	C1C1	c1e1
26	28	C1C1 rho c1e1 pr76	YPD	37	1	YPD_37	r26c28	2355.22	0.107066	824.744	0.989449	1530.48	1.60282	0.604826	1.43421	C1C1	c1e1
26	27	C1C1 rho c1e1 pr76	YPD	37	1	YPD_37	r26c27	2304.14	0.107706	800.279	0.989684	1503.86	1.56805	0.608443	1.40927	C1C1	c1e1
26	31	C1C1 rho c1e1 pr76	YPD	37	1	YPD_37	r26c31	2330.4	0.108354	792.403	0.989274	1538	1.58592	0.612099	1.44125	C1C1	c1e1
27	29	C1C1 rho c1e1 pr76	YPD	37	1	YPD_37	r27c29	2360.84	0.107741	809.442	0.989714	1551.4	1.60664	0.608638	1.45381	C1C1	c1e1
27	30	C1C1 rho c1e1 pr76	YPD	37	1	YPD_37	r27c30	2317.35	0.107741	782.654	0.988891	1534.7	1.57704	0.608637	1.43816	C1C1	c1e1
27	26	C1C1 rho c1e1 pr76	YPD	37	1	YPD_37	r27c26	2388.53	0.10736	833.323	0.989732	1555.2	1.62548	0.606484	1.45738	C1C1	c1e1
27	28	C1C1 rho c1e1 pr76	YPD	37	1	YPD_37	r27c28	2410.44	0.107769	839.252	0.988554	1571.19	1.6404	0.608799	1.47236	C1C1	c1e1
27	27	C1C1 rho c1e1 pr76	YPD	37	1	YPD_37	r27c27	2330.21	0.108097	799.292	0.988829	1530.92	1.5858	0.610647	1.43462	C1C1	c1e1
27	31	C1C1 rho c1e1 pr76	YPD	37	1	YPD_37	r27c31	2429.7	0.107098	842.653	0.989573	1587.05	1.6535	0.605009	1.48722	C1C1	c1e1
30	20	C1C1 rho C1 control 1	YPD	30	4	YPD_30	r30c20	2282.19	0.119901	602.271	0.992752	1679.91	1.68455	0.553274	1.6746	C1C1	c1
30	19	C1C1 rho C1 control 1	YPD	30	4	YPD_30	r30c19	2387.65	0.118757	652.419	0.99285	1735.23	1.76239	0.547994	1.72974	C1C1	c1
30	18	C1C1 rho C1 control 1	YPD	30	4	YPD_30	r30c18	2330.67	0.120573	621.028	0.992223	1709.64	1.72034	0.556374	1.70424	C1C1	c1
30	22	C1C1 rho C1 control 1	YPD	30	4	YPD_30	r30c22	2409.64	0.121073	651.911	0.992729	1757.73	1.77862	0.55868	1.75217	C1C1	c1
30	21	C1C1 rho C1 control 1	YPD	30	4	YPD_30	r30c21	2425.9	0.119712	661.276	0.993104	1764.62	1.79062	0.5524	1.75904	C1C1	c1
30	23	C1C1 rho C1 control 1	YPD	30	4	YPD_30	r30c23	2347.38	0.123072	615.177	0.992592	1732.2	1.73267	0.567905	1.72672	C1C1	c1
3	23	C1C1 rho e1e4 pr3	SOE	37	5	SOE_37	r3c23	1014.53	0.218184	267.159	0.996504	747.374	0.978005	1.70458	1.08623	C1C1	e1e4
3	19	C1C1 rho e1e4 pr3	SOE	37	5	SOE_37	r3c19	1016.61	0.209459	272.991	0.996819	743.615	0.980004	1.63642	1.08077	C1C1	e1e4
3	20	C1C1 rho e1e4 pr3	SOE	37	5	SOE_37	r3c20	1084.84	0.201723	320.192	0.996901	764.651	1.04578	1.57598	1.11134	C1C1	e1e4
3	18	C1C1 rho e1e4 pr3	SOE	37	5	SOE_37	r3c18	1088.18	0.201419	315.872	0.997388	772.313	1.049	1.57361	1.12248	C1C1	e1e4
3	22	C1C1 rho e1e4 pr3	SOE	37	5	SOE_37	r3c22	1080	0.210179	302.114	0.996199	777.884	1.04111	1.64205	1.13058	C1C1	e1e4
3	21	C1C1 rho e1e4 pr3	SOE	37	5	SOE_37	r3c21	1048.02	0.217706	278.3	0.995792	769.724	1.01029	1.70085	1.11872	C1C1	e1e4
22	7	C1C1 rho c1e4 pr49	YPEG	37	3	YPEG_37	r22c7	2107.34	0.0616759	482.739	0.993966	1624.6	1.75353	0.866167	1.59933	C1C1	c1e4
22	3	C1C1 rho c1e4 pr49	YPEG	37	3	YPEG_37	r22c3	2134.64	0.0574324	476.613	0.993185	1658.03	1.77624	0.806573	1.63223	C1C1	c1e4
22	4	C1C1 rho c1e4 pr49	YPEG	37	3	YPEG_37	r22c4	2096.32	0.0582403	473.081	0.993284	1623.24	1.74436	0.817919	1.59799	C1C1	c1e4
22	5	C1C1 rho c1e4 pr49	YPEG	37	3	YPEG_37	r22c5	2038.77	0.0603032	448.231	0.993176	1590.54	1.69646	0.84689	1.56579	C1C1	c1e4
22	6	C1C1 rho c1e4 pr49	YPEG	37	3	YPEG_37	r22c6	2074.48	0.0603539	468.033	0.99317	1606.44	1.72618	0.847602	1.58145	C1C1	c1e4
23	3	C1C1 rho c1e4 pr49	YPEG	37	3	YPEG_37	r23c3	2091.31	0.0565239	467.176	0.993545	1624.13	1.74018	0.793813	1.59886	C1C1	c1e4
23	4	C1C1 rho c1e4 pr49	YPEG	37	3	YPEG_37	r23c4	2065.16	0.057363	467.003	0.993343	1598.16	1.71843	0.805598	1.57329	C1C1	c1e4
23	6	C1C1 rho c1e4 pr49	YPEG	37	3	YPEG_37	r23c6	2072.23	0.0594379	477	0.993689	1595.23	1.72431	0.834738	1.57041	C1C1	c1e4
23	7	C1C1 rho c1e4 pr49	YPEG	37	3	YPEG_37	r23c7	2053.03	0.0612868	467.91	0.994031	1585.12	1.70834	0.860704	1.56046	C1C1	c1e4
19	11	C1C1 rho c1e4 pr56	YPD	30	3	YPD_30	r19c11	2246.72	0.117145	722.354	0.993654	1524.37	1.55164	0.649323	1.49075	C1C1	c1e4
19	10	C1C1 rho c1e4 pr56	YPD	30	3	YPD_30	r19c10	2172.27	0.116441	676.882	0.993634	1495.39	1.50022	0.645424	1.46241	C1C1	c1e4
19	13	C1C1 rho c1e4 pr56	YPD	30	3	YPD_30	r19c13	2211.18	0.117634	693.147	0.993918	1518.03	1.52709	0.652034	1.48455	C1C1	c1e4
19	12	C1C1 rho c1e4 pr56	YPD	30	3	YPD_30	r19c12	2202.5	0.117929	698.905	0.993995	1503.59	1.5211	0.653667	1.47043	C1C1	c1e4
19	15	C1C1 rho c1e4 pr56	YPD	30	3	YPD_30	r19c15	2264.26	0.117232	718.904	0.994237	1545.36	1.56375	0.649804	1.51128	C1C1	c1e4
19	14	C1C1 rho c1e4 pr56	YPD	30	3	YPD_30	r19c14	2202.67	0.117541	683.982	0.993613	1518.69	1.52122	0.651522	1.4852	C1C1	c1e4
18	10	C1C1 rho c1e4 pr56	YPD	30	3	YPD_30	r18c10	2225.54	0.117065	696.541	0.993405	1529	1.53701	0.648882	1.49528	C1C1	c1e4
18	12	C1C1 rho c1e4 pr56	YPD	30	3	YPD_30	r18c12	2157.37	0.11947	667.325	0.993195	1490.04	1.48993	0.662212	1.45718	C1C1	c1e4
18	11	C1C1 rho c1e4 pr56	YPD	30	3	YPD_30	r18c11	2214.8	0.116938	705.001	0.99366	1509.8	1.52959	0.648175	1.4765	C1C1	c1e4
18	14	C1C1 rho c1e4 pr56	YPD	30	3	YPD_30	r18c14	2213.44	0.118931	688.063	0.993601	1525.38	1.52865	0.659225	1.49173	C1C1	c1e4
18	13	C1C1 rho c1e4 pr56	YPD	30	3	YPD_30	r18c13	2228.55	0.118671	691.365	0.993353	1537.18	1.53909	0.657782	1.50328	C1C1	c1e4
18	15	C1C1 rho c1e4 pr56	YPD	30	3	YPD_30	r18c15	2266.45	0.119032	707.179	0.993866	1559.27	1.56526	0.659785	1.52488	C1C1	c1e4
30	10	C1C1 rho E1 control 2	YPEG	30	6	YPEG_30	r30c10	2880.5	0.0664939	380.54	0.998467	2499.96	1.93436	1.06823	1.91634	C1C1	e1
30	12	C1C1 rho E1 control 2	YPEG	30	6	YPEG_30	r30c12	2701.11	0.0677222	323.752	0.999126	2377.36	1.81389	1.08797	1.82236	C1C1	e1
30	11	C1C1 rho E1 control 2	YPEG	30	6	YPEG_30	r30c11	2791.24	0.0660857	353.932	0.999018	2437.31	1.87441	1.06168	1.86831	C1C1	e1
30	15	C1C1 rho E1 control 2	YPEG	30	6	YPEG_30	r30c15	2662.11	0.0685852	293.537	0.999207	2368.58	1.7877	1.10183	1.81563	C1C1	e1
30	14	C1C1 rho E1 control 2	YPEG	30	6	YPEG_30	r30c14	2817.36	0.0667446	344.652	0.999105	2472.7	1.89195	1.07226	1.89544	C1C1	e1
30	13	C1C1 rho E1 control 2	YPEG	30	6	YPEG_30	r30c13	2812.22	0.0669817	348.414	0.99902	2463.8	1.8885	1.07607	1.88862	C1C1	e1
3	39	C1C1 rho c1s1 d96	YPEG	37	4	YPEG_37	r3c39	2237.19	0.0474831	420.198	0.995849	1816.99	1.99045	0.697638	1.87985	C1C1	c1s1
3	34	C1C1 rho c1s1 d96	YPEG	37	4	YPEG_37	r3c34	2162.28	0.0477855	386.143	0.99565	1776.14	1.9238	0.702081	1.83759	C1C1	c1s1
3	36	C1C1 rho c1s1 d96	YPEG	37	4	YPEG_37	r3c36	2211.3	0.0477527	405.504	0.995974	1805.8	1.96742	0.701599	1.86827	C1C1	c1s1
3	35	C1C1 rho c1s1 d96	YPEG	37	4	YPEG_37	r3c35	2270.94	0.0475105	422.605	0.995475	1848.34	2.02048	0.69804	1.91228	C1C1	c1s1
3	37	C1C1 rho c1s1 d96	YPEG	37	4	YPEG_37	r3c37	2353.09	0.0475758	455.322	0.995186	1897.77	2.09357	0.699	1.96343	C1C1	c1s1
3	38	C1C1 rho c1s1 d96	YPEG	37	4	YPEG_37	r3c38	2109.8	0.0477567	374.047	0.995883	1735.75	1.87711	0.701657	1.7958	C1C1	c1s1
3	35	C1C1 rho c1e1 pr 11	YPD	37	2	YPD_37	r3c35	2531.9	0.112486	760.224	0.988757	1771.68	1.56043	0.649299	1.44347	C1C1	c1e1
3	36	C1C1 rho c1e1 pr 11	YPD	37	2	YPD_37	r3c36	2546.77	0.113566	770.594	0.989443	1776.17	1.56959	0.655538	1.44713	C1C1	c1e1
3	34	C1C1 rho c1e1 pr 11	YPD	37	2	YPD_37	r3c34	2491.56	0.116323	714.877	0.987537	1776.68	1.53557	0.671448	1.44754	C1C1	c1e1
3	39	C1C1 rho c1e1 pr 11	YPD	37	2	YPD_37	r3c39	2579.51	0.108365	831.663	0.991077	1747.85	1.58977	0.625515	1.42405	C1C1	c1e1
3	37	C1C1 rho c1e1 pr 11	YPD	37	2	YPD_37	r3c37	2606.95	0.108538	835.584	0.990539	1771.36	1.60668	0.626515	1.44321	C1C1	c1e1
3	38	C1C1 rho c1e1 pr 11	YPD	37	2	YPD_37	r3c38	2603.98	0.109608	828.037	0.990679	1775.94	1.60485	0.632688	1.44694	C1C1	c1e1
26	3	C1C1 rho e1e4 pr73	YPEG	37	5	YPEG_37	r26c3	2691.83	0.0464974	357.362	0.997002	2334.47	2.28023	0.673684	2.29744	C1C1	e1e4
26	4	C1C1 rho e1e4 pr73	YPEG	37	5	YPEG_37	r26c4	2668.83	0.0477714	382.352	0.996899	2286.48	2.26075	0.692143	2.25021	C1C1	e1e4
26	5	C1C1 rho e1e4 pr73	YPEG	37	5	YPEG_37	r26c5	2599.15	0.0485761	378.212	0.996931	2220.94	2.20172	0.703801	2.18571	C1C1	e1e4
26	7	C1C1 rho e1e4 pr73	YPEG	37	5	YPEG_37	r26c7	2749.41	0.0486744	447.362	0.996803	2302.05	2.32901	0.705226	2.26554	C1C1	e1e4
26	6	C1C1 rho e1e4 pr73	YPEG	37	5	YPEG_37	r26c6	2643.34	0.048653	396.041	0.996945	2247.3	2.23916	0.704916	2.21166	C1C1	e1e4
27	3	C1C1 rho e1e4 pr73	YPEG	37	5	YPEG_37	r27c3	2872.04	0.0457644	418.249	0.996813	2453.79	2.43289	0.663063	2.41488	C1C1	e1e4
27	4	C1C1 rho e1e4 pr73	YPEG	37	5	YPEG_37	r27c4	2603.12	0.047995	363.073	0.996984	2240.05	2.20509	0.695383	2.20452	C1C1	e1e4
27	5	C1C1 rho e1e4 pr73	YPEG	37	5	YPEG_37	r27c5	2780.17	0.0475831	436.584	0.997039	2343.59	2.35506	0.689415	2.30642	C1C1	e1e4
27	6	C1C1 rho e1e4 pr73	YPEG	37	5	YPEG_37	r27c6	2491.52	0.0494425	350.299	0.997172	2141.22	2.11055	0.716355	2.10726	C1C1	e1e4
27	7	C1C1 rho e1e4 pr73	YPEG	37	5	YPEG_37	r27c7	2630.31	0.0485321	357.129	0.997357	2273.18	2.22812	0.703164	2.23713	C1C1	e1e4
14	18	C1C1 rho e1e4 pr39	YPEG	37	5	YPEG_37	r14c18	2711.85	0.0587649	417.126	0.99785	2294.72	2.29719	0.851424	2.25833	C1C1	e1e4
14	19	C1C1 rho e1e4 pr39	YPEG	37	5	YPEG_37	r14c19	2748.69	0.0580594	431.632	0.997901	2317.06	2.3284	0.841202	2.28031	C1C1	e1e4
14	20	C1C1 rho e1e4 pr39	YPEG	37	5	YPEG_37	r14c20	2657.24	0.0586139	401.76	0.998126	2255.48	2.25093	0.849236	2.21971	C1C1	e1e4
14	21	C1C1 rho e1e4 pr39	YPEG	37	5	YPEG_37	r14c21	2715.61	0.0580936	420.321	0.997855	2295.29	2.30037	0.841698	2.25888	C1C1	e1e4
14	23	C1C1 rho e1e4 pr39	YPEG	37	5	YPEG_37	r14c23	2681.57	0.0581287	408.806	0.998063	2272.76	2.27154	0.842205	2.23672	C1C1	e1e4
14	22	C1C1 rho e1e4 pr39	YPEG	37	5	YPEG_37	r14c22	2671.41	0.0585758	406.355	0.997995	2265.06	2.26293	0.848684	2.22913	C1C1	e1e4
15	18	C1C1 rho e1e4 pr39	YPEG	37	5	YPEG_37	r15c18	2766.93	0.0582937	436.78	0.997795	2330.15	2.34385	0.844596	2.29319	C1C1	e1e4
15	19	C1C1 rho e1e4 pr39	YPEG	37	5	YPEG_37	r15c19	2767.03	0.0589453	438.564	0.998063	2328.47	2.34393	0.854037	2.29154	C1C1	e1e4
15	20	C1C1 rho e1e4 pr39	YPEG	37	5	YPEG_37	r15c20	2750.09	0.0578472	434.753	0.997928	2315.34	2.32958	0.838127	2.27862	C1C1	e1e4
15	21	C1C1 rho e1e4 pr39	YPEG	37	5	YPEG_37	r15c21	2623.02	0.058598	394.955	0.998141	2228.07	2.22194	0.849005	2.19273	C1C1	e1e4
15	23	C1C1 rho e1e4 pr39	YPEG	37	5	YPEG_37	r15c23	2831.05	0.0577192	456.854	0.997745	2374.2	2.39816	0.836273	2.33654	C1C1	e1e4
15	22	C1C1 rho e1e4 pr39	YPEG	37	5	YPEG_37	r15c22	2707.41	0.058844	420.035	0.99813	2287.37	2.29343	0.852569	2.25109	C1C1	e1e4
3	4	Ref	YPD	30	6	YPD_30	r3c4	1513.22	0.165828	435.098	0.997969	1078.12	1.03788	0.920207	1.02731	Ref	Ref
3	3	Ref	YPD	30	6	YPD_30	r3c3	1608.75	0.155785	432.885	0.998446	1175.87	1.1034	0.864477	1.12045	Ref	Ref
3	6	Ref	YPD	30	6	YPD_30	r3c6	1473.53	0.177757	470.843	0.997334	1002.68	1.01065	0.986403	0.955428	Ref	Ref
3	5	Ref	YPD	30	6	YPD_30	r3c5	1343.51	0.194186	339.422	0.997861	1004.08	0.921475	1.07757	0.956762	Ref	Ref
3	7	Ref	YPD	30	6	YPD_30	r3c7	1350.97	0.20748	364.427	0.998738	986.545	0.926595	1.15134	0.940049	Ref	Ref
26	3	C1C1 rho e1e4 pr73	SOE	30	5	SOE_30	r26c3	1146.45	0.1186	459.936	0.999563	686.511	1.0177	0.940285	0.879882	C1C1	e1e4
26	4	C1C1 rho e1e4 pr73	SOE	30	5	SOE_30	r26c4	1071.5	0.128989	445.215	0.999645	626.29	0.951171	1.02265	0.802698	C1C1	e1e4
26	5	C1C1 rho e1e4 pr73	SOE	30	5	SOE_30	r26c5	1009.78	0.135476	419.253	0.999353	590.531	0.896382	1.07408	0.756868	C1C1	e1e4
27	4	C1C1 rho e1e4 pr73	SOE	30	5	SOE_30	r27c4	1066.02	0.124109	459.256	0.998927	606.762	0.946302	0.983958	0.777671	C1C1	e1e4
27	5	C1C1 rho e1e4 pr73	SOE	30	5	SOE_30	r27c5	1061.65	0.137428	455.32	0.999543	606.335	0.942428	1.08955	0.777123	C1C1	e1e4
27	6	C1C1 rho e1e4 pr73	SOE	30	5	SOE_30	r27c6	1014.91	0.138664	427.182	0.999603	587.723	0.900928	1.09935	0.753268	C1C1	e1e4
27	7	C1C1 rho e1e4 pr73	SOE	30	5	SOE_30	r27c7	983.014	0.138861	417.324	0.999132	565.69	0.872619	1.10091	0.72503	C1C1	e1e4
27	3	C1C1 rho e1e4 pr73	SOE	30	5	SOE_30	r27c3	1111.91	0.124796	437.471	0.999013	674.437	0.987037	0.989407	0.864407	C1C1	e1e4
26	6	C1C1 rho e1e4 pr73	SOE	30	5	SOE_30	r26c6	1038.13	0.141422	444.029	0.999603	594.105	0.921548	1.12122	0.761448	C1C1	e1e4
26	7	C1C1 rho e1e4 pr73	SOE	30	5	SOE_30	r26c7	980.206	0.148898	399.606	0.999274	580.6	0.870126	1.18049	0.744139	C1C1	e1e4
19	28	C1C1 rho c1e1 pr58	SOE	37	2	SOE_37	r19c28	1148	0.215289	365.455	0.998371	782.547	1.11752	1.53576	1.10984	C1C1	c1e1
19	29	C1C1 rho c1e1 pr58	SOE	37	2	SOE_37	r19c29	1172.83	0.213282	382.049	0.99832	790.782	1.14169	1.52144	1.12152	C1C1	c1e1
19	27	C1C1 rho c1e1 pr58	SOE	37	2	SOE_37	r19c27	1195.6	0.216069	383.766	0.998222	811.838	1.16386	1.54132	1.15139	C1C1	c1e1
19	31	C1C1 rho c1e1 pr58	SOE	37	2	SOE_37	r19c31	1148.32	0.214812	366.591	0.998651	781.727	1.11783	1.53235	1.10868	C1C1	c1e1
19	30	C1C1 rho c1e1 pr58	SOE	37	2	SOE_37	r19c30	1158.17	0.214107	376.69	0.998519	781.483	1.12743	1.52732	1.10834	C1C1	c1e1
19	26	C1C1 rho c1e1 pr58	SOE	37	2	SOE_37	r19c26	1175.24	0.212825	381.097	0.997923	794.14	1.14404	1.51818	1.12629	C1C1	c1e1
18	31	C1C1 rho c1e1 pr58	SOE	37	2	SOE_37	r18c31	1187.65	0.21091	399.687	0.998718	787.965	1.15612	1.50452	1.11753	C1C1	c1e1
18	28	C1C1 rho c1e1 pr58	SOE	37	2	SOE_37	r18c28	1199.37	0.20774	410.668	0.998729	788.697	1.16752	1.4819	1.11857	C1C1	c1e1
18	27	C1C1 rho c1e1 pr58	SOE	37	2	SOE_37	r18c27	1175.7	0.209578	377.665	0.998562	798.039	1.14449	1.49502	1.13182	C1C1	c1e1
18	30	C1C1 rho c1e1 pr58	SOE	37	2	SOE_37	r18c30	1242.71	0.212311	424.682	0.998654	818.031	1.20972	1.51451	1.16017	C1C1	c1e1
18	29	C1C1 rho c1e1 pr58	SOE	37	2	SOE_37	r18c29	1135.58	0.220751	352.67	0.997799	782.91	1.10543	1.57472	1.11036	C1C1	c1e1
18	26	C1C1 rho c1e1 pr58	SOE	37	2	SOE_37	r18c26	1134.53	0.213779	354.079	0.998038	780.45	1.10441	1.52498	1.10687	C1C1	c1e1
19	15	C1C1 rho e1e4 pr56	YPD	30	6	YPD_30	r19c15	2290.99	0.101143	702.467	0.991492	1588.52	1.57133	0.561258	1.51366	C1C1	e1e4
19	10	C1C1 rho e1e4 pr56	YPD	30	6	YPD_30	r19c10	2272.72	0.0996161	683.792	0.991952	1588.93	1.5588	0.552787	1.51404	C1C1	e1e4
19	12	C1C1 rho e1e4 pr56	YPD	30	6	YPD_30	r19c12	2278.61	0.0993877	700.877	0.991938	1577.73	1.56284	0.55152	1.50338	C1C1	e1e4
19	11	C1C1 rho e1e4 pr56	YPD	30	6	YPD_30	r19c11	2318.48	0.098918	718.981	0.99169	1599.5	1.59018	0.548914	1.52411	C1C1	e1e4
19	14	C1C1 rho e1e4 pr56	YPD	30	6	YPD_30	r19c14	2279.75	0.100266	697.453	0.992415	1582.3	1.56362	0.556393	1.50773	C1C1	e1e4
19	13	C1C1 rho e1e4 pr56	YPD	30	6	YPD_30	r19c13	2258.1	0.100548	676.507	0.991928	1581.59	1.54877	0.557957	1.50705	C1C1	e1e4
18	11	C1C1 rho e1e4 pr56	YPD	30	6	YPD_30	r18c11	2286.2	0.0994918	702.468	0.991657	1583.73	1.56804	0.552097	1.50909	C1C1	e1e4
18	10	C1C1 rho e1e4 pr56	YPD	30	6	YPD_30	r18c10	2279.79	0.0995586	683.282	0.991186	1596.5	1.56364	0.552468	1.52126	C1C1	e1e4
18	13	C1C1 rho e1e4 pr56	YPD	30	6	YPD_30	r18c13	2288.39	0.10051	693.91	0.991907	1594.48	1.56955	0.557745	1.51934	C1C1	e1e4
18	12	C1C1 rho e1e4 pr56	YPD	30	6	YPD_30	r18c12	2234.45	0.101801	673.613	0.991615	1560.84	1.53255	0.564909	1.48728	C1C1	e1e4
18	15	C1C1 rho e1e4 pr56	YPD	30	6	YPD_30	r18c15	2333.89	0.100203	714.513	0.992546	1619.38	1.60075	0.556045	1.54306	C1C1	e1e4
18	14	C1C1 rho e1e4 pr56	YPD	30	6	YPD_30	r18c14	2268.22	0.101577	689.468	0.992418	1578.75	1.55571	0.563667	1.50434	C1C1	e1e4
14	3	C1C1 rho c1e4 pr25	SOE	30	3	SOE_30	r14c3	1195.78	0.165351	341.714	0.996025	854.066	1.08378	1.1185	1.08895	C1C1	c1e4
14	4	C1C1 rho c1e4 pr25	SOE	30	3	SOE_30	r14c4	1187.36	0.17391	363.101	0.996826	824.258	1.07615	1.17639	1.05095	C1C1	c1e4
14	5	C1C1 rho c1e4 pr25	SOE	30	3	SOE_30	r14c5	1115.3	0.189727	333.584	0.996366	781.717	1.01084	1.28339	0.996706	C1C1	c1e4
14	6	C1C1 rho c1e4 pr25	SOE	30	3	SOE_30	r14c6	1140.48	0.18913	366.537	0.997533	773.945	1.03367	1.27934	0.986796	C1C1	c1e4
14	7	C1C1 rho c1e4 pr25	SOE	30	3	SOE_30	r14c7	1141.67	0.193945	368.34	0.99789	773.331	1.03474	1.31192	0.986013	C1C1	c1e4
15	7	C1C1 rho c1e4 pr25	SOE	30	3	SOE_30	r15c7	1135.39	0.19508	367.257	0.997201	768.134	1.02905	1.31959	0.979387	C1C1	c1e4
15	3	C1C1 rho c1e4 pr25	SOE	30	3	SOE_30	r15c3	1248.65	0.163616	366.503	0.995984	882.152	1.13171	1.10676	1.12476	C1C1	c1e4
15	4	C1C1 rho c1e4 pr25	SOE	30	3	SOE_30	r15c4	1237.82	0.180321	383.235	0.99602	854.583	1.12189	1.21976	1.08961	C1C1	c1e4
15	5	C1C1 rho c1e4 pr25	SOE	30	3	SOE_30	r15c5	1108.91	0.18218	341.777	0.99719	767.135	1.00505	1.23234	0.978114	C1C1	c1e4
15	6	C1C1 rho c1e4 pr25	SOE	30	3	SOE_30	r15c6	1173.32	0.194565	367.092	0.996591	806.232	1.06343	1.31611	1.02796	C1C1	c1e4
3	26	C1C1 rho c1s1 d94	YPEG	37	4	YPEG_37	r3c26	1927.94	0.0541097	384.895	0.993049	1543.04	1.7153	0.794998	1.59643	C1C1	c1s1
3	28	C1C1 rho c1s1 d94	YPEG	37	4	YPEG_37	r3c28	1855.46	0.0531551	365.733	0.994439	1489.72	1.65082	0.780972	1.54126	C1C1	c1s1
3	27	C1C1 rho c1s1 d94	YPEG	37	4	YPEG_37	r3c27	1925.43	0.0537006	389.469	0.994068	1535.96	1.71308	0.788988	1.5891	C1C1	c1s1
3	29	C1C1 rho c1s1 d94	YPEG	37	4	YPEG_37	r3c29	1819.72	0.0529862	354.666	0.994703	1465.05	1.61902	0.778491	1.51573	C1C1	c1s1
3	30	C1C1 rho c1s1 d94	YPEG	37	4	YPEG_37	r3c30	1799.93	0.0536344	347.994	0.994994	1451.93	1.60141	0.788015	1.50216	C1C1	c1s1
3	31	C1C1 rho c1s1 d94	YPEG	37	4	YPEG_37	r3c31	1967.42	0.0533343	409.887	0.994424	1557.54	1.75044	0.783605	1.61142	C1C1	c1s1
14	11	C1C1 rho c1s1 d129	SOE	30	4	SOE_30	r14c11	1092.3	0.152708	455.832	0.99868	636.468	1.01669	1.12343	0.870787	C1C1	c1s1
14	12	C1C1 rho c1s1 d129	SOE	30	4	SOE_30	r14c12	1091.34	0.171465	424.9	0.999574	666.444	1.0158	1.26142	0.911798	C1C1	c1s1
14	13	C1C1 rho c1s1 d129	SOE	30	4	SOE_30	r14c13	1073.54	0.166854	419.982	0.999424	653.554	0.999226	1.2275	0.894163	C1C1	c1s1
14	14	C1C1 rho c1s1 d129	SOE	30	4	SOE_30	r14c14	1041.86	0.183122	373.269	0.999712	668.596	0.969747	1.34718	0.914743	C1C1	c1s1
14	15	C1C1 rho c1s1 d129	SOE	30	4	SOE_30	r14c15	1078.91	0.169487	416.74	0.999431	662.167	1.00423	1.24687	0.905947	C1C1	c1s1
14	10	C1C1 rho c1s1 d129	SOE	30	4	SOE_30	r14c10	1093.94	0.151852	462.287	0.998927	631.65	1.01821	1.11714	0.864195	C1C1	c1s1
15	15	C1C1 rho c1s1 d129	SOE	30	4	SOE_30	r15c15	1068.9	0.152393	439.382	0.998185	629.522	0.994914	1.12111	0.861284	C1C1	c1s1
15	10	C1C1 rho c1s1 d129	SOE	30	4	SOE_30	r15c10	1056.8	0.156614	436.06	0.998992	620.743	0.983652	1.15217	0.849273	C1C1	c1s1
15	11	C1C1 rho c1s1 d129	SOE	30	4	SOE_30	r15c11	1080.56	0.158369	438.466	0.998929	642.097	1.00577	1.16508	0.878488	C1C1	c1s1
15	12	C1C1 rho c1s1 d129	SOE	30	4	SOE_30	r15c12	1091.18	0.151648	462.644	0.998466	628.538	1.01565	1.11563	0.859938	C1C1	c1s1
15	13	C1C1 rho c1s1 d129	SOE	30	4	SOE_30	r15c13	1015.65	0.167298	383.312	0.999536	632.34	0.945349	1.23077	0.865139	C1C1	c1s1
15	14	C1C1 rho c1s1 d129	SOE	30	4	SOE_30	r15c14	1090.2	0.159397	442.735	0.999037	647.469	1.01474	1.17264	0.885839	C1C1	c1s1
15	19	C1C1 rho c1e4 pr45	YPD	30	3	YPD_30	r15c19	2367.74	0.113378	726.532	0.993252	1641.21	1.63521	0.628445	1.60501	C1C1	c1e4
15	18	C1C1 rho c1e4 pr45	YPD	30	3	YPD_30	r15c18	2382.94	0.112643	730.773	0.993294	1652.17	1.64571	0.62437	1.61573	C1C1	c1e4
15	21	C1C1 rho c1e4 pr45	YPD	30	3	YPD_30	r15c21	2372.32	0.111772	731.633	0.993426	1640.69	1.63838	0.619542	1.6045	C1C1	c1e4
15	20	C1C1 rho c1e4 pr45	YPD	30	3	YPD_30	r15c20	2372.16	0.113943	723.194	0.993432	1648.97	1.63827	0.631578	1.6126	C1C1	c1e4
15	23	C1C1 rho c1e4 pr45	YPD	30	3	YPD_30	r15c23	2360.99	0.11403	715.517	0.993052	1645.47	1.63055	0.63206	1.60918	C1C1	c1e4
15	22	C1C1 rho c1e4 pr45	YPD	30	3	YPD_30	r15c22	2420.02	0.112856	737.016	0.993488	1683.01	1.67132	0.625549	1.64589	C1C1	c1e4
14	18	C1C1 rho c1e4 pr45	YPD	30	3	YPD_30	r14c18	2289.28	0.114666	683.665	0.993218	1605.61	1.58103	0.635583	1.5702	C1C1	c1e4
14	20	C1C1 rho c1e4 pr45	YPD	30	3	YPD_30	r14c20	2356.69	0.113921	709.486	0.993043	1647.21	1.62759	0.631452	1.61088	C1C1	c1e4
14	19	C1C1 rho c1e4 pr45	YPD	30	3	YPD_30	r14c19	2338.79	0.11447	700.33	0.993503	1638.46	1.61522	0.634496	1.60232	C1C1	c1e4
14	22	C1C1 rho c1e4 pr45	YPD	30	3	YPD_30	r14c22	2309.51	0.113736	686.519	0.993052	1622.99	1.595	0.630427	1.5872	C1C1	c1e4
14	21	C1C1 rho c1e4 pr45	YPD	30	3	YPD_30	r14c21	2375.63	0.114149	714.429	0.993331	1661.2	1.64066	0.632717	1.62456	C1C1	c1e4
14	23	C1C1 rho c1e4 pr45	YPD	30	3	YPD_30	r14c23	2349.62	0.112701	708.626	0.993715	1640.99	1.6227	0.624689	1.6048	C1C1	c1e4
15	42	C1C1 rho e1e4 pr42	YPD	30	5	YPD_30	r15c42	2341.55	0.0959978	737.626	0.991976	1603.93	1.63089	0.511765	1.60714	C1C1	e1e4
14	43	C1C1 rho e1e4 pr42	YPD	30	5	YPD_30	r14c43	2360.51	0.0949714	752.536	0.992636	1607.97	1.64409	0.506294	1.6112	C1C1	e1e4
14	42	C1C1 rho e1e4 pr42	YPD	30	5	YPD_30	r14c42	2346.24	0.0958672	752.02	0.992196	1594.22	1.63415	0.51107	1.59742	C1C1	e1e4
14	45	C1C1 rho e1e4 pr42	YPD	30	5	YPD_30	r14c45	2501.98	0.0932706	749.492	0.99417	1752.49	1.74263	0.497227	1.756	C1C1	e1e4
14	44	C1C1 rho e1e4 pr42	YPD	30	5	YPD_30	r14c44	2409.85	0.0925744	754.115	0.992842	1655.74	1.67846	0.493515	1.65906	C1C1	e1e4
14	46	C1C1 rho e1e4 pr42	YPD	30	5	YPD_30	r14c46	2706.24	0.0864646	746.621	0.99375	1959.62	1.88489	0.460944	1.96355	C1C1	e1e4
15	45	C1C1 rho e1e4 pr42	YPD	30	5	YPD_30	r15c45	2538.14	0.0905605	752.392	0.993336	1785.75	1.76781	0.482779	1.78933	C1C1	e1e4
15	44	C1C1 rho e1e4 pr42	YPD	30	5	YPD_30	r15c44	2484.46	0.091636	785.436	0.992472	1699.02	1.73042	0.488513	1.70243	C1C1	e1e4
15	46	C1C1 rho e1e4 pr42	YPD	30	5	YPD_30	r15c46	2724.37	0.0846713	760.244	0.993134	1964.12	1.89752	0.451384	1.96806	C1C1	e1e4
15	43	C1C1 rho e1e4 pr42	YPD	30	5	YPD_30	r15c43	2386.7	0.0940029	761.265	0.992146	1625.43	1.66233	0.501131	1.62869	C1C1	e1e4
23	34	C1C1 rho c1e1 pr71	YPEG	37	2	YPEG_37	r23c34	2651.61	0.0523811	452.734	0.996771	2198.88	2.24233	0.769482	2.16557	C1C1	c1e1
23	35	C1C1 rho c1e1 pr71	YPEG	37	2	YPEG_37	r23c35	2774.8	0.0516076	502.897	0.996561	2271.91	2.3465	0.758119	2.23749	C1C1	c1e1
23	36	C1C1 rho c1e1 pr71	YPEG	37	2	YPEG_37	r23c36	2710.64	0.0524278	488.146	0.99655	2222.49	2.29224	0.770167	2.18883	C1C1	c1e1
23	38	C1C1 rho c1e1 pr71	YPEG	37	2	YPEG_37	r23c38	2801.6	0.052575	530.83	0.996348	2270.77	2.36916	0.77233	2.23637	C1C1	c1e1
23	37	C1C1 rho c1e1 pr71	YPEG	37	2	YPEG_37	r23c37	2679.67	0.0526667	480.791	0.996394	2198.88	2.26605	0.773677	2.16558	C1C1	c1e1
23	39	C1C1 rho c1e1 pr71	YPEG	37	2	YPEG_37	r23c39	2680.36	0.0531935	487.432	0.996277	2192.92	2.26663	0.781416	2.15971	C1C1	c1e1
22	36	C1C1 rho c1e1 pr71	YPEG	37	2	YPEG_37	r22c36	2525.41	0.0530524	423.503	0.99686	2101.91	2.1356	0.779343	2.07007	C1C1	c1e1
22	37	C1C1 rho c1e1 pr71	YPEG	37	2	YPEG_37	r22c37	2548.81	0.0529622	438.561	0.997075	2110.25	2.15539	0.778019	2.07828	C1C1	c1e1
22	38	C1C1 rho c1e1 pr71	YPEG	37	2	YPEG_37	r22c38	2573.68	0.053233	450.071	0.996948	2123.61	2.17643	0.781997	2.09145	C1C1	c1e1
22	39	C1C1 rho c1e1 pr71	YPEG	37	2	YPEG_37	r22c39	2648.73	0.0526812	485.208	0.996562	2163.52	2.23989	0.77389	2.13075	C1C1	c1e1
22	34	C1C1 rho c1e1 pr71	YPEG	37	2	YPEG_37	r22c34	2731.63	0.0520072	484.144	0.996497	2247.48	2.30999	0.76399	2.21344	C1C1	c1e1
22	35	C1C1 rho c1e1 pr71	YPEG	37	2	YPEG_37	r22c35	2843.09	0.0517481	533.206	0.99674	2309.88	2.40425	0.760183	2.2749	C1C1	c1e1
3	29	C1C1 rho e1e4 pr10	SOE	37	6	SOE_37	r3c29	1082.5	0.208436	309.393	0.99716	773.104	1.07264	1.66922	1.13204	C1C1	e1e4
3	31	C1C1 rho e1e4 pr10	SOE	37	6	SOE_37	r3c31	1054.57	0.207856	294.321	0.996762	760.247	1.04497	1.66459	1.11322	C1C1	e1e4
3	27	C1C1 rho e1e4 pr10	SOE	37	6	SOE_37	r3c27	1105.67	0.209386	315.997	0.996848	789.673	1.0956	1.67684	1.1563	C1C1	e1e4
3	28	C1C1 rho e1e4 pr10	SOE	37	6	SOE_37	r3c28	1046.41	0.210219	287.01	0.996776	759.405	1.03689	1.68351	1.11198	C1C1	e1e4
3	26	C1C1 rho e1e4 pr10	SOE	37	6	SOE_37	r3c26	1103.79	0.210853	318.627	0.997158	785.166	1.09374	1.68859	1.1497	C1C1	e1e4
7	30	C1C1 rho c1e1 pr22	SOE	30	2	SOE_30	r7c30	1189.77	0.201424	398.007	0.998208	791.761	1.0563	1.28278	0.986203	C1C1	c1e1
7	31	C1C1 rho c1e1 pr22	SOE	30	2	SOE_30	r7c31	1154.79	0.200278	377.548	0.997398	777.241	1.02525	1.27548	0.968118	C1C1	c1e1
7	26	C1C1 rho c1e1 pr22	SOE	30	2	SOE_30	r7c26	1164.11	0.198851	378.018	0.998866	786.093	1.03353	1.26639	0.979144	C1C1	c1e1
7	27	C1C1 rho c1e1 pr22	SOE	30	2	SOE_30	r7c27	1186.58	0.203894	383.9	0.998273	802.68	1.05347	1.29851	0.999804	C1C1	c1e1
7	28	C1C1 rho c1e1 pr22	SOE	30	2	SOE_30	r7c28	1186.76	0.197951	389.175	0.998214	797.581	1.05363	1.26066	0.993453	C1C1	c1e1
6	31	C1C1 rho c1e1 pr22	SOE	30	2	SOE_30	r6c31	1190.99	0.203914	388.288	0.998563	802.705	1.05739	1.29864	0.999835	C1C1	c1e1
6	27	C1C1 rho c1e1 pr22	SOE	30	2	SOE_30	r6c27	1179.96	0.208302	374.67	0.998381	805.29	1.0476	1.32658	1.00305	C1C1	c1e1
6	28	C1C1 rho c1e1 pr22	SOE	30	2	SOE_30	r6c28	1162.46	0.198478	374.038	0.998244	788.419	1.03206	1.26401	0.982041	C1C1	c1e1
6	29	C1C1 rho c1e1 pr22	SOE	30	2	SOE_30	r6c29	1147.26	0.212294	353.206	0.997676	794.054	1.01856	1.35201	0.98906	C1C1	c1e1
6	30	C1C1 rho c1e1 pr22	SOE	30	2	SOE_30	r6c30	1182.41	0.203582	391.111	0.998297	791.301	1.04977	1.29652	0.98563	C1C1	c1e1
6	26	C1C1 rho c1e1 pr22	SOE	30	2	SOE_30	r6c26	1143.72	0.200029	368.018	0.998591	775.704	1.01542	1.2739	0.966203	C1C1	c1e1
3	27	C1C1 rho c1e1 pr 4	YPD	30	1	YPD_30	r3c27	2531.63	0.121948	586.099	0.992461	1945.53	1.88915	0.588344	1.99957	C1C1	c1e1
3	26	C1C1 rho c1e1 pr 4	YPD	30	1	YPD_30	r3c26	2498.68	0.121212	574.37	0.992851	1924.31	1.86456	0.584793	1.97776	C1C1	c1e1
3	30	C1C1 rho c1e1 pr 4	YPD	30	1	YPD_30	r3c30	2505.06	0.12184	568.993	0.992492	1936.07	1.86932	0.587821	1.98984	C1C1	c1e1
3	29	C1C1 rho c1e1 pr 4	YPD	30	1	YPD_30	r3c29	2506.67	0.122144	587.32	0.992215	1919.35	1.87052	0.589292	1.97266	C1C1	c1e1
3	28	C1C1 rho c1e1 pr 4	YPD	30	1	YPD_30	r3c28	2513.42	0.120813	596.566	0.992327	1916.85	1.87556	0.58287	1.97009	C1C1	c1e1
7	42	C1C1 rho c1e4 pr24	YPEG	37	3	YPEG_37	r7c42	2606.65	0.049667	515.607	0.995894	2091.04	2.169	0.697516	2.05851	C1C1	c1e4
7	43	C1C1 rho c1e4 pr24	YPEG	37	3	YPEG_37	r7c43	2637.61	0.0493915	516.301	0.996023	2121.31	2.19476	0.693647	2.0883	C1C1	c1e4
7	44	C1C1 rho c1e4 pr24	YPEG	37	3	YPEG_37	r7c44	2693.72	0.0482299	535.179	0.996369	2158.54	2.24146	0.677334	2.12496	C1C1	c1e4
7	45	C1C1 rho c1e4 pr24	YPEG	37	3	YPEG_37	r7c45	2788.48	0.047401	541.788	0.99569	2246.69	2.3203	0.665693	2.21173	C1C1	c1e4
7	46	C1C1 rho c1e4 pr24	YPEG	37	3	YPEG_37	r7c46	2816.64	0.0464075	520.045	0.995916	2296.59	2.34373	0.651741	2.26086	C1C1	c1e4
6	44	C1C1 rho c1e4 pr24	YPEG	37	3	YPEG_37	r6c44	2725.7	0.0483214	536.247	0.995735	2189.46	2.26807	0.678619	2.15539	C1C1	c1e4
6	45	C1C1 rho c1e4 pr24	YPEG	37	3	YPEG_37	r6c45	2793.49	0.047145	540.599	0.995585	2252.89	2.32447	0.662098	2.21784	C1C1	c1e4
6	46	C1C1 rho c1e4 pr24	YPEG	37	3	YPEG_37	r6c46	2884.46	0.0461234	545.521	0.996215	2338.93	2.40016	0.647751	2.30254	C1C1	c1e4
6	43	C1C1 rho c1e4 pr24	YPEG	37	3	YPEG_37	r6c43	2563.95	0.0490105	485.205	0.995941	2078.75	2.13347	0.688296	2.0464	C1C1	c1e4
6	42	C1C1 rho c1e4 pr24	YPEG	37	3	YPEG_37	r6c42	2634.28	0.0494149	515.793	0.996087	2118.49	2.192	0.693976	2.08553	C1C1	c1e4
26	46	C1C1 rho c1e4 pr42	YPD	37	3	YPD_37	r26c46	2642.52	0.0887348	830.96	0.988771	1811.56	1.65041	0.532078	1.51974	C1C1	c1e4
26	44	C1C1 rho c1e4 pr42	YPD	37	3	YPD_37	r26c44	2461.87	0.0953439	835.468	0.987654	1626.41	1.53758	0.571708	1.36441	C1C1	c1e4
26	45	C1C1 rho c1e4 pr42	YPD	37	3	YPD_37	r26c45	2502.98	0.094171	816.229	0.9876	1686.75	1.56326	0.564675	1.41503	C1C1	c1e4
26	42	C1C1 rho c1e4 pr42	YPD	37	3	YPD_37	r26c42	2373.44	0.0987318	824.007	0.988021	1549.44	1.48235	0.592022	1.29983	C1C1	c1e4
26	43	C1C1 rho c1e4 pr42	YPD	37	3	YPD_37	r26c43	2421.16	0.0969032	844.181	0.98803	1576.98	1.51216	0.581058	1.32294	C1C1	c1e4
27	44	C1C1 rho c1e4 pr42	YPD	37	3	YPD_37	r27c44	2431.74	0.09446	807.396	0.987261	1624.34	1.51876	0.566408	1.36267	C1C1	c1e4
27	43	C1C1 rho c1e4 pr42	YPD	37	3	YPD_37	r27c43	2423.85	0.0960556	835.973	0.987996	1587.88	1.51383	0.575975	1.33208	C1C1	c1e4
27	45	C1C1 rho c1e4 pr42	YPD	37	3	YPD_37	r27c45	2516.15	0.0927754	820.625	0.988602	1695.52	1.57148	0.556306	1.42239	C1C1	c1e4
27	42	C1C1 rho c1e4 pr42	YPD	37	3	YPD_37	r27c42	2400.91	0.0970519	837.414	0.988291	1563.49	1.4995	0.581949	1.31163	C1C1	c1e4
27	46	C1C1 rho c1e4 pr42	YPD	37	3	YPD_37	r27c46	2563.85	0.0906904	773.37	0.988166	1790.48	1.60127	0.543804	1.50205	C1C1	c1e4
7	10	C1C1 rho e1e4 pr14	YPEG	37	5	YPEG_37	r7c10	2481.13	0.05217	385.18	0.996825	2095.95	2.10175	0.755873	2.06271	C1C1	e1e4
7	11	C1C1 rho e1e4 pr14	YPEG	37	5	YPEG_37	r7c11	2498.49	0.0526907	392.18	0.996983	2106.31	2.11646	0.763416	2.07291	C1C1	e1e4
7	12	C1C1 rho e1e4 pr14	YPEG	37	5	YPEG_37	r7c12	2430.1	0.052831	375.236	0.997176	2054.87	2.05852	0.76545	2.02228	C1C1	e1e4
7	13	C1C1 rho e1e4 pr14	YPEG	37	5	YPEG_37	r7c13	2509.42	0.0528582	404.46	0.996932	2104.96	2.12571	0.765844	2.07157	C1C1	e1e4
7	14	C1C1 rho e1e4 pr14	YPEG	37	5	YPEG_37	r7c14	2527.81	0.0525753	409.92	0.997022	2117.89	2.14129	0.761744	2.0843	C1C1	e1e4
7	15	C1C1 rho e1e4 pr14	YPEG	37	5	YPEG_37	r7c15	2537.02	0.0529691	417.614	0.996997	2119.41	2.1491	0.76745	2.0858	C1C1	e1e4
6	15	C1C1 rho e1e4 pr14	YPEG	37	5	YPEG_37	r6c15	2367.61	0.0532284	353.381	0.997256	2014.23	2.00559	0.771207	1.98229	C1C1	e1e4
6	11	C1C1 rho e1e4 pr14	YPEG	37	5	YPEG_37	r6c11	2431.26	0.0525167	361.16	0.996979	2070.1	2.05951	0.760896	2.03727	C1C1	e1e4
6	10	C1C1 rho e1e4 pr14	YPEG	37	5	YPEG_37	r6c10	2562.19	0.0507344	401.351	0.996884	2160.84	2.17042	0.735072	2.12657	C1C1	e1e4
6	12	C1C1 rho e1e4 pr14	YPEG	37	5	YPEG_37	r6c12	2606.84	0.0513802	425.582	0.996874	2181.25	2.20823	0.744429	2.14666	C1C1	e1e4
6	13	C1C1 rho e1e4 pr14	YPEG	37	5	YPEG_37	r6c13	2451.93	0.0530578	369.216	0.996966	2082.72	2.07701	0.768736	2.04968	C1C1	e1e4
6	14	C1C1 rho e1e4 pr14	YPEG	37	5	YPEG_37	r6c14	2472.51	0.05218	384.053	0.997129	2088.46	2.09445	0.756017	2.05533	C1C1	e1e4
26	28	C1C1 rho c1e1 pr76	YPEG	37	1	YPEG_37	r26c28	2037.46	0.0582011	423.779	0.993409	1613.68	1.63759	0.858736	1.51098	C1C1	c1e1
26	29	C1C1 rho c1e1 pr76	YPEG	37	1	YPEG_37	r26c29	1931.27	0.0584741	383.427	0.994008	1547.84	1.55224	0.862764	1.44934	C1C1	c1e1
26	31	C1C1 rho c1e1 pr76	YPEG	37	1	YPEG_37	r26c31	1938.29	0.0587864	382.409	0.993802	1555.89	1.55789	0.867372	1.45687	C1C1	c1e1
26	30	C1C1 rho c1e1 pr76	YPEG	37	1	YPEG_37	r26c30	2124.63	0.0578159	456.18	0.992844	1668.45	1.70765	0.853052	1.56227	C1C1	c1e1
26	26	C1C1 rho c1e1 pr76	YPEG	37	1	YPEG_37	r26c26	1992.77	0.0570396	424.046	0.994292	1568.73	1.60167	0.841599	1.46889	C1C1	c1e1
26	27	C1C1 rho c1e1 pr76	YPEG	37	1	YPEG_37	r26c27	1925.66	0.057721	390.842	0.994274	1534.81	1.54773	0.851652	1.43713	C1C1	c1e1
27	26	C1C1 rho c1e1 pr76	YPEG	37	1	YPEG_37	r27c26	1887.43	0.0566935	387.303	0.994287	1500.13	1.51701	0.836493	1.40466	C1C1	c1e1
27	27	C1C1 rho c1e1 pr76	YPEG	37	1	YPEG_37	r27c27	1900.08	0.0570798	382.986	0.994289	1517.09	1.52717	0.842192	1.42054	C1C1	c1e1
27	28	C1C1 rho c1e1 pr76	YPEG	37	1	YPEG_37	r27c28	2001.42	0.0575465	407.631	0.993565	1593.79	1.60862	0.849078	1.49236	C1C1	c1e1
27	29	C1C1 rho c1e1 pr76	YPEG	37	1	YPEG_37	r27c29	2042.1	0.0570274	446.274	0.993228	1595.83	1.64132	0.841419	1.49426	C1C1	c1e1
27	31	C1C1 rho c1e1 pr76	YPEG	37	1	YPEG_37	r27c31	2045.16	0.0586264	421.331	0.993074	1623.83	1.64378	0.865011	1.52049	C1C1	c1e1
6	6	C1C1 rho e1e4 pr19	YPD	37	6	YPD_37	r6c6	2635.1	0.0806072	760.015	0.988283	1875.09	1.64475	0.464904	1.53105	C1C1	e1e4
6	5	C1C1 rho e1e4 pr19	YPD	37	6	YPD_37	r6c5	2556.61	0.0827593	698.198	0.988848	1858.41	1.59576	0.477316	1.51743	C1C1	e1e4
6	7	C1C1 rho e1e4 pr19	YPD	37	6	YPD_37	r6c7	2473.72	0.0841464	699.501	0.987637	1774.22	1.54403	0.485316	1.44869	C1C1	e1e4
6	3	C1C1 rho e1e4 pr19	YPD	37	6	YPD_37	r6c3	2814.44	0.0805989	726.874	0.991303	2087.57	1.75669	0.464856	1.70454	C1C1	e1e4
6	4	C1C1 rho e1e4 pr19	YPD	37	6	YPD_37	r6c4	2722.89	0.0791084	741.988	0.990534	1980.91	1.69955	0.456259	1.61745	C1C1	e1e4
7	6	C1C1 rho e1e4 pr19	YPD	37	6	YPD_37	r7c6	2428.35	0.0875064	692.673	0.987711	1735.68	1.51571	0.504695	1.41722	C1C1	e1e4
7	7	C1C1 rho e1e4 pr19	YPD	37	6	YPD_37	r7c7	2337.38	0.0883494	666.217	0.988009	1671.16	1.45892	0.509557	1.36454	C1C1	e1e4
7	3	C1C1 rho e1e4 pr19	YPD	37	6	YPD_37	r7c3	2783.34	0.0822469	756.732	0.99175	2026.6	1.73728	0.474361	1.65476	C1C1	e1e4
7	4	C1C1 rho e1e4 pr19	YPD	37	6	YPD_37	r7c4	2618.13	0.0830939	738.393	0.990207	1879.74	1.63416	0.479246	1.53485	C1C1	e1e4
7	5	C1C1 rho e1e4 pr19	YPD	37	6	YPD_37	r7c5	2555.31	0.0852158	741.36	0.989205	1813.95	1.59495	0.491484	1.48113	C1C1	e1e4
10	3	C1C1 rho c1e1 pr25	YPEG	37	1	YPEG_37	r10c3	2018.63	0.0540263	365.514	0.994439	1653.11	1.62245	0.797139	1.54791	C1C1	c1e1
10	4	C1C1 rho c1e1 pr25	YPEG	37	1	YPEG_37	r10c4	2249.14	0.053762	463.668	0.994213	1785.47	1.80773	0.793238	1.67184	C1C1	c1e1
10	5	C1C1 rho c1e1 pr25	YPEG	37	1	YPEG_37	r10c5	2127.22	0.0565291	410.526	0.993706	1716.69	1.70973	0.834066	1.60744	C1C1	c1e1
10	6	C1C1 rho c1e1 pr25	YPEG	37	1	YPEG_37	r10c6	1983.27	0.05546	381.875	0.994683	1601.39	1.59403	0.818292	1.49947	C1C1	c1e1
10	7	C1C1 rho c1e1 pr25	YPEG	37	1	YPEG_37	r10c7	2039.27	0.0572624	400.484	0.99446	1638.79	1.63905	0.844886	1.53449	C1C1	c1e1
11	3	C1C1 rho c1e1 pr25	YPEG	37	1	YPEG_37	r11c3	2087.34	0.0536897	393.128	0.994108	1694.21	1.67768	0.792173	1.58639	C1C1	c1e1
11	4	C1C1 rho c1e1 pr25	YPEG	37	1	YPEG_37	r11c4	2037.66	0.0551506	383.448	0.994105	1654.21	1.63775	0.813728	1.54894	C1C1	c1e1
11	5	C1C1 rho c1e1 pr25	YPEG	37	1	YPEG_37	r11c5	2120.85	0.0543645	433.146	0.994107	1687.7	1.70461	0.802129	1.58029	C1C1	c1e1
11	6	C1C1 rho c1e1 pr25	YPEG	37	1	YPEG_37	r11c6	2074.78	0.0556208	415.035	0.994521	1659.74	1.66758	0.820665	1.55411	C1C1	c1e1
11	7	C1C1 rho c1e1 pr25	YPEG	37	1	YPEG_37	r11c7	1956.92	0.0569381	374.879	0.994778	1582.04	1.57285	0.840101	1.48135	C1C1	c1e1
26	10	C1C1 rho c1e1 pr74	YPEG	37	1	YPEG_37	r26c10	1950.03	0.0568811	414.755	0.99396	1535.28	1.56732	0.83926	1.43757	C1C1	c1e1
26	11	C1C1 rho c1e1 pr74	YPEG	37	1	YPEG_37	r26c11	1974.36	0.0564811	423.231	0.99376	1551.13	1.58687	0.833358	1.45241	C1C1	c1e1
26	12	C1C1 rho c1e1 pr74	YPEG	37	1	YPEG_37	r26c12	1962.25	0.0564814	424.126	0.993968	1538.12	1.57714	0.833363	1.44023	C1C1	c1e1
26	13	C1C1 rho c1e1 pr74	YPEG	37	1	YPEG_37	r26c13	1991.86	0.0574086	426.705	0.993685	1565.16	1.60094	0.847043	1.46555	C1C1	c1e1
26	14	C1C1 rho c1e1 pr74	YPEG	37	1	YPEG_37	r26c14	1961.3	0.057582	414.926	0.993574	1546.37	1.57638	0.849602	1.44796	C1C1	c1e1
27	10	C1C1 rho c1e1 pr74	YPEG	37	1	YPEG_37	r27c10	2055.88	0.0564156	456.721	0.993221	1599.16	1.6524	0.832392	1.49739	C1C1	c1e1
27	11	C1C1 rho c1e1 pr74	YPEG	37	1	YPEG_37	r27c11	2030.82	0.0559811	452.856	0.993332	1577.96	1.63225	0.825981	1.47754	C1C1	c1e1
27	12	C1C1 rho c1e1 pr74	YPEG	37	1	YPEG_37	r27c12	2032.13	0.056282	453.313	0.99365	1578.82	1.63331	0.830421	1.47834	C1C1	c1e1
27	13	C1C1 rho c1e1 pr74	YPEG	37	1	YPEG_37	r27c13	1950.02	0.0562487	420.938	0.993824	1529.08	1.56731	0.82993	1.43177	C1C1	c1e1
27	14	C1C1 rho c1e1 pr74	YPEG	37	1	YPEG_37	r27c14	1933.33	0.0575899	405.58	0.993472	1527.75	1.5539	0.849719	1.43052	C1C1	c1e1
27	15	C1C1 rho c1e1 pr74	YPEG	37	1	YPEG_37	r27c15	2009.92	0.0570766	441.801	0.993617	1568.12	1.61546	0.842144	1.46832	C1C1	c1e1
26	15	C1C1 rho c1e1 pr74	YPEG	37	1	YPEG_37	r26c15	2078.17	0.0574205	463.381	0.99306	1614.79	1.67031	0.847219	1.51202	C1C1	c1e1
23	45	C1C1 rho c1e4 pr41	SOE	37	3	SOE_37	r23c45	1101	0.154806	469.998	0.998659	630.999	1.09742	1.17351	0.930818	C1C1	c1e4
23	46	C1C1 rho c1e4 pr41	SOE	37	3	SOE_37	r23c46	1225.55	0.141262	502.353	0.998752	723.192	1.22157	1.07084	1.06682	C1C1	c1e4
23	44	C1C1 rho c1e4 pr41	SOE	37	3	SOE_37	r23c44	1077.49	0.166954	471.835	0.998723	605.651	1.07399	1.2656	0.893426	C1C1	c1e4
23	42	C1C1 rho c1e4 pr41	SOE	37	3	SOE_37	r23c42	1072.38	0.18425	469.979	0.998733	602.403	1.0689	1.39672	0.888635	C1C1	c1e4
23	43	C1C1 rho c1e4 pr41	SOE	37	3	SOE_37	r23c43	1000.88	0.191539	402.737	0.998544	598.143	0.99763	1.45197	0.88235	C1C1	c1e4
22	44	C1C1 rho c1e4 pr41	SOE	37	3	SOE_37	r22c44	1127.75	0.166755	501.829	0.998613	625.917	1.12408	1.26409	0.923321	C1C1	c1e4
22	46	C1C1 rho c1e4 pr41	SOE	37	3	SOE_37	r22c46	1235.08	0.139164	506.889	0.998759	728.196	1.23107	1.05494	1.0742	C1C1	c1e4
22	45	C1C1 rho c1e4 pr41	SOE	37	3	SOE_37	r22c45	1116.74	0.154927	473.683	0.998669	643.057	1.11311	1.17443	0.948606	C1C1	c1e4
22	42	C1C1 rho c1e4 pr41	SOE	37	3	SOE_37	r22c42	1084.03	0.181262	483.925	0.998766	600.107	1.08051	1.37407	0.885248	C1C1	c1e4
22	43	C1C1 rho c1e4 pr41	SOE	37	3	SOE_37	r22c43	1074.29	0.173645	480.106	0.998634	594.189	1.07081	1.31632	0.876517	C1C1	c1e4
11	31	C1C1 rho e1e4 pr28	SOE	30	5	SOE_30	r11c31	993.565	0.194061	328.952	0.998564	664.613	0.881985	1.53855	0.851817	C1C1	e1e4
11	26	C1C1 rho e1e4 pr28	SOE	30	5	SOE_30	r11c26	1064.79	0.163555	400.682	0.999212	664.112	0.945215	1.29669	0.851175	C1C1	e1e4
11	27	C1C1 rho e1e4 pr28	SOE	30	5	SOE_30	r11c27	978.534	0.191845	313.494	0.998256	665.04	0.868641	1.52098	0.852363	C1C1	e1e4
11	28	C1C1 rho e1e4 pr28	SOE	30	5	SOE_30	r11c28	1084.14	0.152289	441.926	0.999014	642.213	0.962387	1.20738	0.823107	C1C1	e1e4
11	29	C1C1 rho e1e4 pr28	SOE	30	5	SOE_30	r11c29	1049.71	0.165873	401.494	0.999148	648.218	0.931827	1.31507	0.830804	C1C1	e1e4
11	30	C1C1 rho e1e4 pr28	SOE	30	5	SOE_30	r11c30	1036.93	0.170248	384.227	0.999386	652.706	0.920482	1.34976	0.836556	C1C1	e1e4
10	30	C1C1 rho e1e4 pr28	SOE	30	5	SOE_30	r10c30	1073.04	0.16842	409.384	0.999277	663.653	0.952531	1.33526	0.850585	C1C1	e1e4
10	31	C1C1 rho e1e4 pr28	SOE	30	5	SOE_30	r10c31	1114.38	0.156817	459.501	0.999683	654.875	0.989228	1.24328	0.839336	C1C1	e1e4
10	26	C1C1 rho e1e4 pr28	SOE	30	5	SOE_30	r10c26	1071.07	0.171649	389.702	0.998727	681.365	0.950783	1.36086	0.873287	C1C1	e1e4
10	27	C1C1 rho e1e4 pr28	SOE	30	5	SOE_30	r10c27	1081.09	0.151602	444.18	0.999182	636.914	0.959683	1.20193	0.816315	C1C1	e1e4
10	28	C1C1 rho e1e4 pr28	SOE	30	5	SOE_30	r10c28	1079.17	0.156946	426.93	0.999079	652.237	0.957974	1.24429	0.835955	C1C1	e1e4
10	29	C1C1 rho e1e4 pr28	SOE	30	5	SOE_30	r10c29	957.791	0.197098	295.516	0.997938	662.276	0.850228	1.56263	0.84882	C1C1	e1e4
14	36	C1C1 rho c1e1 pr41	YPEG	30	1	YPEG_30	r14c36	3271.16	0.0653775	445.971	0.998871	2825.19	2.2219	1.07578	2.20856	C1C1	c1e1
15	34	C1C1 rho c1e1 pr41	YPEG	30	1	YPEG_30	r15c34	3039.5	0.0659525	422.321	0.998765	2617.18	2.06455	1.08524	2.04595	C1C1	c1e1
15	39	C1C1 rho c1e1 pr41	YPEG	30	1	YPEG_30	r15c39	2991.56	0.0668214	425.729	0.998774	2565.83	2.03198	1.09954	2.0058	C1C1	c1e1
15	38	C1C1 rho c1e1 pr41	YPEG	30	1	YPEG_30	r15c38	3140.88	0.0644506	464.972	0.998533	2675.91	2.13341	1.06053	2.09185	C1C1	c1e1
15	37	C1C1 rho c1e1 pr41	YPEG	30	1	YPEG_30	r15c37	2995.12	0.0671084	418.864	0.998726	2576.25	2.0344	1.10426	2.01395	C1C1	c1e1
15	36	C1C1 rho c1e1 pr41	YPEG	30	1	YPEG_30	r15c36	3072.06	0.065516	432.27	0.998497	2639.79	2.08666	1.07806	2.06362	C1C1	c1e1
15	35	C1C1 rho c1e1 pr41	YPEG	30	1	YPEG_30	r15c35	2987.21	0.0672693	414.093	0.998915	2573.12	2.02903	1.10691	2.0115	C1C1	c1e1
14	39	C1C1 rho c1e1 pr41	YPEG	30	1	YPEG_30	r14c39	3114	0.0668716	425.653	0.998653	2688.35	2.11515	1.10036	2.10158	C1C1	c1e1
14	38	C1C1 rho c1e1 pr41	YPEG	30	1	YPEG_30	r14c38	3228.38	0.0659291	450.515	0.99869	2777.87	2.19284	1.08486	2.17156	C1C1	c1e1
14	35	C1C1 rho c1e1 pr41	YPEG	30	1	YPEG_30	r14c35	3210.66	0.0661323	421.829	0.998801	2788.84	2.18081	1.0882	2.18013	C1C1	c1e1
14	34	C1C1 rho c1e1 pr41	YPEG	30	1	YPEG_30	r14c34	3174.06	0.0661962	430.484	0.998991	2743.58	2.15595	1.08925	2.14476	C1C1	c1e1
14	37	C1C1 rho c1e1 pr41	YPEG	30	1	YPEG_30	r14c37	3191.95	0.0655216	426.126	0.998849	2765.83	2.1681	1.07815	2.16215	C1C1	c1e1
15	29	C1C1 rho c1e1 pr46	YPD	37	2	YPD_37	r15c29	2357.67	0.118743	720.35	0.988613	1637.32	1.45305	0.685419	1.334	C1C1	c1e1
15	28	C1C1 rho c1e1 pr46	YPD	37	2	YPD_37	r15c28	2348.8	0.118122	715.818	0.987824	1632.98	1.44758	0.681835	1.33046	C1C1	c1e1
15	26	C1C1 rho c1e1 pr46	YPD	37	2	YPD_37	r15c26	2438.76	0.115929	772.67	0.989451	1666.09	1.50303	0.669174	1.35744	C1C1	c1e1
15	27	C1C1 rho c1e1 pr46	YPD	37	2	YPD_37	r15c27	2524.57	0.114895	820.208	0.990026	1704.37	1.55591	0.663209	1.38862	C1C1	c1e1
15	30	C1C1 rho c1e1 pr46	YPD	37	2	YPD_37	r15c30	2353.75	0.120066	708.015	0.987831	1645.74	1.45063	0.693054	1.34085	C1C1	c1e1
15	31	C1C1 rho c1e1 pr46	YPD	37	2	YPD_37	r15c31	2450.7	0.115883	776.414	0.989211	1674.29	1.51039	0.66891	1.36412	C1C1	c1e1
14	26	C1C1 rho c1e1 pr46	YPD	37	2	YPD_37	r14c26	2394.58	0.118011	740.759	0.989584	1653.82	1.4758	0.681194	1.34744	C1C1	c1e1
14	29	C1C1 rho c1e1 pr46	YPD	37	2	YPD_37	r14c29	2415.82	0.118338	740.469	0.988237	1675.35	1.48889	0.683081	1.36498	C1C1	c1e1
14	30	C1C1 rho c1e1 pr46	YPD	37	2	YPD_37	r14c30	2484.93	0.115685	800.409	0.989691	1684.52	1.53148	0.667765	1.37245	C1C1	c1e1
14	28	C1C1 rho c1e1 pr46	YPD	37	2	YPD_37	r14c28	2472.03	0.117045	786.195	0.989511	1685.83	1.52353	0.675615	1.37352	C1C1	c1e1
14	27	C1C1 rho c1e1 pr46	YPD	37	2	YPD_37	r14c27	2485.36	0.117059	789.113	0.989716	1696.25	1.53175	0.675699	1.38201	C1C1	c1e1
14	31	C1C1 rho c1e1 pr46	YPD	37	2	YPD_37	r14c31	2428.16	0.120467	743.545	0.988721	1684.61	1.49649	0.695371	1.37253	C1C1	c1e1
26	15	C1C1 rho c1s1 d115	YPD	30	4	YPD_30	r26c15	2262.16	0.116146	690.243	0.994466	1571.92	1.66977	0.535945	1.56695	C1C1	c1s1
26	11	C1C1 rho c1s1 d115	YPD	30	4	YPD_30	r26c11	2248.07	0.11447	704.067	0.994363	1544	1.65936	0.528213	1.53912	C1C1	c1s1
26	10	C1C1 rho c1s1 d115	YPD	30	4	YPD_30	r26c10	2222.41	0.114766	691.495	0.994356	1530.92	1.64043	0.52958	1.52608	C1C1	c1s1
26	13	C1C1 rho c1s1 d115	YPD	30	4	YPD_30	r26c13	2247.5	0.117077	690.769	0.994452	1556.74	1.65895	0.540242	1.55181	C1C1	c1s1
26	12	C1C1 rho c1s1 d115	YPD	30	4	YPD_30	r26c12	2264.07	0.114184	717.38	0.994689	1546.69	1.67118	0.526891	1.5418	C1C1	c1s1
26	14	C1C1 rho c1s1 d115	YPD	30	4	YPD_30	r26c14	2300.59	0.115646	718.128	0.994645	1582.46	1.69813	0.53364	1.57746	C1C1	c1s1
27	12	C1C1 rho c1s1 d115	YPD	30	4	YPD_30	r27c12	2267.39	0.113069	712.987	0.99431	1554.4	1.67363	0.521746	1.54949	C1C1	c1s1
27	11	C1C1 rho c1s1 d115	YPD	30	4	YPD_30	r27c11	2225.22	0.114141	687.671	0.99486	1537.55	1.6425	0.526694	1.53269	C1C1	c1s1
27	10	C1C1 rho c1s1 d115	YPD	30	4	YPD_30	r27c10	2249.81	0.112882	705.104	0.994348	1544.7	1.66065	0.520883	1.53982	C1C1	c1s1
27	13	C1C1 rho c1s1 d115	YPD	30	4	YPD_30	r27c13	2261.97	0.113426	710.22	0.994489	1551.75	1.66962	0.523397	1.54684	C1C1	c1s1
27	15	C1C1 rho c1s1 d115	YPD	30	4	YPD_30	r27c15	2237.07	0.1149	695.544	0.994133	1541.53	1.65125	0.530197	1.53665	C1C1	c1s1
27	14	C1C1 rho c1s1 d115	YPD	30	4	YPD_30	r27c14	2279.23	0.115064	714.47	0.994439	1564.76	1.68237	0.530954	1.55981	C1C1	c1s1
26	18	C1C1 rho c1e1 pr75	YPD	37	1	YPD_37	r26c18	2331.86	0.107496	826.288	0.991605	1505.58	1.58692	0.607254	1.41087	C1C1	c1e1
26	22	C1C1 rho c1e1 pr75	YPD	37	1	YPD_37	r26c22	2322.03	0.109518	789.1	0.991978	1532.93	1.58023	0.618679	1.43651	C1C1	c1e1
26	23	C1C1 rho c1e1 pr75	YPD	37	1	YPD_37	r26c23	2405.59	0.109799	826.91	0.99148	1578.68	1.6371	0.620264	1.47938	C1C1	c1e1
26	20	C1C1 rho c1e1 pr75	YPD	37	1	YPD_37	r26c20	2415.15	0.108263	844.982	0.991734	1570.16	1.6436	0.611589	1.4714	C1C1	c1e1
26	19	C1C1 rho c1e1 pr75	YPD	37	1	YPD_37	r26c19	2305.76	0.108377	795.276	0.991519	1510.49	1.56916	0.612233	1.41547	C1C1	c1e1
26	21	C1C1 rho c1e1 pr75	YPD	37	1	YPD_37	r26c21	2310.34	0.108082	782.657	0.991478	1527.68	1.57227	0.610567	1.43159	C1C1	c1e1
27	23	C1C1 rho c1e1 pr75	YPD	37	1	YPD_37	r27c23	2259.36	0.110093	737.909	0.991054	1521.45	1.53758	0.621925	1.42575	C1C1	c1e1
27	22	C1C1 rho c1e1 pr75	YPD	37	1	YPD_37	r27c22	2339.84	0.108711	779.217	0.991368	1560.63	1.59235	0.614121	1.46246	C1C1	c1e1
27	18	C1C1 rho c1e1 pr75	YPD	37	1	YPD_37	r27c18	2342.91	0.109692	813.802	0.991599	1529.11	1.59444	0.619662	1.43292	C1C1	c1e1
27	21	C1C1 rho c1e1 pr75	YPD	37	1	YPD_37	r27c21	2433.03	0.108171	832.468	0.991226	1600.56	1.65577	0.611067	1.49988	C1C1	c1e1
27	19	C1C1 rho c1e1 pr75	YPD	37	1	YPD_37	r27c19	2310.77	0.107849	792.694	0.991389	1518.08	1.57257	0.609251	1.42259	C1C1	c1e1
27	20	C1C1 rho c1e1 pr75	YPD	37	1	YPD_37	r27c20	2361.61	0.108498	800.785	0.990938	1560.83	1.60717	0.612915	1.46265	C1C1	c1e1
19	6	C1C1 rho e1e4 pr49	SOE	37	5	SOE_37	r19c6	1044.02	0.198699	369.486	0.997609	674.538	1.00643	1.55236	0.980373	C1C1	e1e4
19	4	C1C1 rho e1e4 pr49	SOE	37	5	SOE_37	r19c4	1089.93	0.161022	411.109	0.998533	678.825	1.05069	1.258	0.986604	C1C1	e1e4
19	5	C1C1 rho e1e4 pr49	SOE	37	5	SOE_37	r19c5	1082.96	0.17785	403.061	0.998088	679.902	1.04397	1.38947	0.988169	C1C1	e1e4
19	7	C1C1 rho e1e4 pr49	SOE	37	5	SOE_37	r19c7	1045.17	0.18905	398.37	0.998083	646.804	1.00754	1.47698	0.940065	C1C1	e1e4
19	3	C1C1 rho e1e4 pr49	SOE	37	5	SOE_37	r19c3	1143.59	0.138153	424.719	0.99931	718.867	1.10241	1.07933	1.0448	C1C1	e1e4
18	4	C1C1 rho e1e4 pr49	SOE	37	5	SOE_37	r18c4	1091.25	0.148571	431.331	0.999309	659.923	1.05196	1.16073	0.959132	C1C1	e1e4
18	6	C1C1 rho e1e4 pr49	SOE	37	5	SOE_37	r18c6	1075.88	0.179109	417.442	0.998901	658.441	1.03715	1.39931	0.956977	C1C1	e1e4
18	7	C1C1 rho e1e4 pr49	SOE	37	5	SOE_37	r18c7	1063.6	0.18906	399.175	0.998161	664.421	1.0253	1.47705	0.96567	C1C1	e1e4
18	5	C1C1 rho e1e4 pr49	SOE	37	5	SOE_37	r18c5	1030.28	0.205513	334.094	0.99626	696.185	0.993185	1.60559	1.01184	C1C1	e1e4
11	28	C1C1 rho e1e4 pr28	SOE	37	5	SOE_37	r11c28	1059.32	0.196257	373.449	0.997973	685.874	1.02118	1.53328	0.996849	C1C1	e1e4
11	29	C1C1 rho e1e4 pr28	SOE	37	5	SOE_37	r11c29	1057.03	0.206427	357.465	0.997562	699.568	1.01898	1.61273	1.01675	C1C1	e1e4
11	27	C1C1 rho e1e4 pr28	SOE	37	5	SOE_37	r11c27	960.045	0.221309	288.019	0.996675	672.025	0.925479	1.729	0.976721	C1C1	e1e4
11	31	C1C1 rho e1e4 pr28	SOE	37	5	SOE_37	r11c31	981.277	0.213769	306.276	0.9969	675.001	0.945947	1.67009	0.981046	C1C1	e1e4
11	30	C1C1 rho e1e4 pr28	SOE	37	5	SOE_37	r11c30	1032.34	0.218671	332.649	0.997178	699.689	0.995169	1.70839	1.01693	C1C1	e1e4
11	26	C1C1 rho e1e4 pr28	SOE	37	5	SOE_37	r11c26	1057.8	0.197712	374.854	0.998528	682.948	1.01972	1.54465	0.992597	C1C1	e1e4
10	30	C1C1 rho e1e4 pr28	SOE	37	5	SOE_37	r10c30	1051.6	0.207466	347.957	0.997117	703.642	1.01374	1.62085	1.02267	C1C1	e1e4
10	31	C1C1 rho e1e4 pr28	SOE	37	5	SOE_37	r10c31	1102.83	0.18239	433.126	0.998762	669.703	1.06312	1.42494	0.973347	C1C1	e1e4
10	28	C1C1 rho e1e4 pr28	SOE	37	5	SOE_37	r10c28	1071	0.189587	392.535	0.99812	678.468	1.03244	1.48117	0.986086	C1C1	e1e4
10	27	C1C1 rho e1e4 pr28	SOE	37	5	SOE_37	r10c27	1083.52	0.191804	400.506	0.998945	683.012	1.04451	1.49849	0.99269	C1C1	e1e4
10	29	C1C1 rho e1e4 pr28	SOE	37	5	SOE_37	r10c29	940.295	0.221637	275.339	0.996865	664.956	0.90644	1.73156	0.966446	C1C1	e1e4
10	26	C1C1 rho e1e4 pr28	SOE	37	5	SOE_37	r10c26	1049.55	0.19926	363.439	0.997995	686.106	1.01176	1.55674	0.997187	C1C1	e1e4
18	22	C1C1 rho e1e4 pr57	YPD	37	6	YPD_37	r18c22	2428.89	0.0983742	797.961	0.99026	1630.93	1.51604	0.567375	1.33169	C1C1	e1e4
18	23	C1C1 rho e1e4 pr57	YPD	37	6	YPD_37	r18c23	2490.06	0.0976814	827.565	0.991209	1662.49	1.55422	0.563379	1.35746	C1C1	e1e4
18	20	C1C1 rho e1e4 pr57	YPD	37	6	YPD_37	r18c20	2454.44	0.0968392	802.714	0.991237	1651.73	1.53199	0.558522	1.34867	C1C1	e1e4
18	19	C1C1 rho e1e4 pr57	YPD	37	6	YPD_37	r18c19	2459.41	0.0973223	812.698	0.990315	1646.71	1.53509	0.561308	1.34458	C1C1	e1e4
18	21	C1C1 rho e1e4 pr57	YPD	37	6	YPD_37	r18c21	2525.64	0.0989132	838.546	0.990273	1687.09	1.57643	0.570484	1.37754	C1C1	e1e4
18	18	C1C1 rho e1e4 pr57	YPD	37	6	YPD_37	r18c18	2419.65	0.0984495	788.351	0.990886	1631.3	1.51028	0.56781	1.33199	C1C1	e1e4
19	20	C1C1 rho e1e4 pr57	YPD	37	6	YPD_37	r19c20	2526.91	0.0972203	843.366	0.990741	1683.54	1.57722	0.56072	1.37464	C1C1	e1e4
19	21	C1C1 rho e1e4 pr57	YPD	37	6	YPD_37	r19c21	2404.89	0.0987962	778.403	0.990974	1626.49	1.50106	0.569809	1.32806	C1C1	e1e4
19	18	C1C1 rho e1e4 pr57	YPD	37	6	YPD_37	r19c18	2426.7	0.0986729	791.128	0.99097	1635.57	1.51468	0.569098	1.33548	C1C1	e1e4
19	19	C1C1 rho e1e4 pr57	YPD	37	6	YPD_37	r19c19	2428.24	0.0979426	789.508	0.990745	1638.73	1.51563	0.564886	1.33806	C1C1	e1e4
19	22	C1C1 rho e1e4 pr57	YPD	37	6	YPD_37	r19c22	2441.16	0.0969915	810.892	0.99075	1630.27	1.5237	0.559401	1.33115	C1C1	e1e4
19	23	C1C1 rho e1e4 pr57	YPD	37	6	YPD_37	r19c23	2481.26	0.0967509	826.215	0.990636	1655.05	1.54873	0.558013	1.35138	C1C1	e1e4
30	46	C1C1 rho c1s1 d126	SOE	30	4	SOE_30	r30c46	1124.19	0.135652	407.626	0.999094	716.563	1.04637	0.997959	0.98037	C1C1	c1s1
30	43	C1C1 rho c1s1 d126	SOE	30	4	SOE_30	r30c43	1063.94	0.143899	431.613	0.998637	632.33	0.990298	1.05863	0.865125	C1C1	c1s1
30	44	C1C1 rho c1s1 d126	SOE	30	4	SOE_30	r30c44	1038.04	0.150242	396.081	0.999241	641.961	0.96619	1.10529	0.878303	C1C1	c1s1
30	45	C1C1 rho c1s1 d126	SOE	30	4	SOE_30	r30c45	1120.59	0.13858	440.872	0.999053	679.721	1.04303	1.0195	0.929964	C1C1	c1s1
30	42	C1C1 rho c1s1 d126	SOE	30	4	SOE_30	r30c42	1083.71	0.143825	451.502	0.998151	632.21	1.0087	1.05808	0.864961	C1C1	c1s1
6	10	C1C1 rho c1e1 pr20	YPD	30	2	YPD_30	r6c10	2389.11	0.102583	654.811	0.991814	1734.3	1.67015	0.515561	1.57701	C1C1	c1e1
6	13	C1C1 rho c1e1 pr20	YPD	30	2	YPD_30	r6c13	2364.31	0.112237	632.469	0.993332	1731.84	1.65282	0.564078	1.57477	C1C1	c1e1
6	12	C1C1 rho c1e1 pr20	YPD	30	2	YPD_30	r6c12	2371.63	0.109612	640.35	0.993108	1731.28	1.65793	0.550889	1.57426	C1C1	c1e1
6	11	C1C1 rho c1e1 pr20	YPD	30	2	YPD_30	r6c11	2381	0.10733	645.709	0.9927	1735.29	1.66448	0.539419	1.57791	C1C1	c1e1
6	15	C1C1 rho c1e1 pr20	YPD	30	2	YPD_30	r6c15	2300.81	0.114845	626.787	0.993712	1674.02	1.60842	0.577186	1.5222	C1C1	c1e1
6	14	C1C1 rho c1e1 pr20	YPD	30	2	YPD_30	r6c14	2305.7	0.114527	617.735	0.993923	1687.97	1.61184	0.57559	1.53487	C1C1	c1e1
7	10	C1C1 rho c1e1 pr20	YPD	30	2	YPD_30	r7c10	2317.83	0.107585	613.592	0.992559	1704.24	1.62032	0.540698	1.54967	C1C1	c1e1
7	13	C1C1 rho c1e1 pr20	YPD	30	2	YPD_30	r7c13	2280.54	0.114588	607.99	0.993768	1672.55	1.59426	0.575894	1.52086	C1C1	c1e1
7	12	C1C1 rho c1e1 pr20	YPD	30	2	YPD_30	r7c12	2304.9	0.114011	600.065	0.993016	1704.83	1.61128	0.572998	1.55021	C1C1	c1e1
7	11	C1C1 rho c1e1 pr20	YPD	30	2	YPD_30	r7c11	2335.25	0.111715	617.413	0.992829	1717.83	1.6325	0.561456	1.56203	C1C1	c1e1
7	15	C1C1 rho c1e1 pr20	YPD	30	2	YPD_30	r7c15	2327.95	0.11671	624.68	0.994306	1703.27	1.6274	0.586558	1.54879	C1C1	c1e1
7	14	C1C1 rho c1e1 pr20	YPD	30	2	YPD_30	r7c14	2341.2	0.115687	632.821	0.993895	1708.38	1.63666	0.581417	1.55344	C1C1	c1e1
30	28	C1C1 rho E4 control 1	YPD	37	6	YPD_37	r30c28	2404.61	0.107458	724.115	0.987901	1680.49	1.50089	0.619766	1.37216	C1C1	e4
30	30	C1C1 rho E4 control 1	YPD	37	6	YPD_37	r30c30	2528.62	0.104525	805.52	0.989332	1723.1	1.57829	0.602849	1.40695	C1C1	e4
30	29	C1C1 rho E4 control 1	YPD	37	6	YPD_37	r30c29	2581.14	0.103106	848.293	0.990294	1732.84	1.61107	0.594665	1.4149	C1C1	e4
30	26	C1C1 rho E4 control 1	YPD	37	6	YPD_37	r30c26	2372.74	0.110454	702.611	0.987363	1670.13	1.481	0.637048	1.3637	C1C1	e4
30	27	C1C1 rho E4 control 1	YPD	37	6	YPD_37	r30c27	2486.43	0.10681	773.205	0.988541	1713.23	1.55196	0.61603	1.39889	C1C1	e4
30	31	C1C1 rho E4 control 1	YPD	37	6	YPD_37	r30c31	2550.43	0.101927	830.487	0.99029	1719.94	1.5919	0.587867	1.40437	C1C1	e4
6	18	C1C1 rho e1e4 pr15	YPD	30	5	YPD_30	r6c18	2394.85	0.087627	729.726	0.989254	1665.12	1.66801	0.467141	1.66846	C1C1	e1e4
6	20	C1C1 rho e1e4 pr15	YPD	30	5	YPD_30	r6c20	2445.69	0.0849963	776.835	0.989876	1668.85	1.70342	0.453116	1.6722	C1C1	e1e4
6	19	C1C1 rho e1e4 pr15	YPD	30	5	YPD_30	r6c19	2413.14	0.0868452	748.848	0.989623	1664.29	1.68075	0.462973	1.66763	C1C1	e1e4
6	22	C1C1 rho e1e4 pr15	YPD	30	5	YPD_30	r6c22	2425.68	0.0862915	757.487	0.989703	1668.19	1.68948	0.460021	1.67154	C1C1	e1e4
6	21	C1C1 rho e1e4 pr15	YPD	30	5	YPD_30	r6c21	2426.08	0.0863039	751.493	0.989609	1674.59	1.68976	0.460087	1.67795	C1C1	e1e4
6	23	C1C1 rho e1e4 pr15	YPD	30	5	YPD_30	r6c23	2425.74	0.0868617	766.351	0.989988	1659.39	1.68953	0.463061	1.66272	C1C1	e1e4
7	23	C1C1 rho e1e4 pr15	YPD	30	5	YPD_30	r7c23	2412	0.08611	765.044	0.990596	1646.96	1.67996	0.459053	1.65026	C1C1	e1e4
7	18	C1C1 rho e1e4 pr15	YPD	30	5	YPD_30	r7c18	2410.47	0.0876961	742.499	0.989301	1667.98	1.67889	0.467509	1.67132	C1C1	e1e4
7	20	C1C1 rho e1e4 pr15	YPD	30	5	YPD_30	r7c20	2385.14	0.0892155	732.3	0.98994	1652.84	1.66125	0.475609	1.65616	C1C1	e1e4
7	19	C1C1 rho e1e4 pr15	YPD	30	5	YPD_30	r7c19	2402.64	0.0876241	746.281	0.989881	1656.35	1.67343	0.467125	1.65968	C1C1	e1e4
7	22	C1C1 rho e1e4 pr15	YPD	30	5	YPD_30	r7c22	2440.65	0.0868723	767.875	0.989915	1672.78	1.69991	0.463118	1.67613	C1C1	e1e4
7	21	C1C1 rho e1e4 pr15	YPD	30	5	YPD_30	r7c21	2425.33	0.0874066	747.987	0.99	1677.34	1.68924	0.465966	1.68071	C1C1	e1e4
11	38	C1C1 rho e1e4 pr29	YPEG	37	5	YPEG_37	r11c38	2864.67	0.05491	499.517	0.997342	2365.16	2.42664	0.795571	2.32764	C1C1	e1e4
11	39	C1C1 rho e1e4 pr29	YPEG	37	5	YPEG_37	r11c39	2715.72	0.0549789	454.872	0.997359	2260.85	2.30047	0.79657	2.22499	C1C1	e1e4
10	35	C1C1 rho e1e4 pr29	YPEG	37	5	YPEG_37	r10c35	2900.49	0.0538319	493.354	0.997302	2407.14	2.45699	0.77995	2.36896	C1C1	e1e4
10	34	C1C1 rho e1e4 pr29	YPEG	37	5	YPEG_37	r10c34	2939.99	0.0531825	496.88	0.997599	2443.11	2.49045	0.770542	2.40437	C1C1	e1e4
10	36	C1C1 rho e1e4 pr29	YPEG	37	5	YPEG_37	r10c36	2879.27	0.0544601	498.276	0.99748	2380.99	2.43901	0.789052	2.34323	C1C1	e1e4
10	37	C1C1 rho e1e4 pr29	YPEG	37	5	YPEG_37	r10c37	2771.65	0.0548769	467.098	0.997582	2304.55	2.34784	0.795091	2.268	C1C1	e1e4
10	38	C1C1 rho e1e4 pr29	YPEG	37	5	YPEG_37	r10c38	2850.87	0.0550943	499.394	0.997425	2351.48	2.41495	0.798241	2.31418	C1C1	e1e4
11	34	C1C1 rho e1e4 pr29	YPEG	37	5	YPEG_37	r11c34	2895.09	0.0541025	483.226	0.997627	2411.87	2.45241	0.783872	2.37361	C1C1	e1e4
10	39	C1C1 rho e1e4 pr29	YPEG	37	5	YPEG_37	r10c39	2870.01	0.0543291	501.705	0.997442	2368.31	2.43117	0.787155	2.33075	C1C1	e1e4
11	35	C1C1 rho e1e4 pr29	YPEG	37	5	YPEG_37	r11c35	2759.01	0.0546006	444.708	0.997564	2314.3	2.33714	0.791088	2.27759	C1C1	e1e4
11	36	C1C1 rho e1e4 pr29	YPEG	37	5	YPEG_37	r11c36	2885.95	0.0535332	493.514	0.997167	2392.43	2.44466	0.775624	2.35449	C1C1	e1e4
11	37	C1C1 rho e1e4 pr29	YPEG	37	5	YPEG_37	r11c37	2831.15	0.0551415	482.638	0.997206	2348.51	2.39825	0.798925	2.31127	C1C1	e1e4
14	4	C1C1 rho c1s1 d128	SOE	30	4	SOE_30	r14c4	1143.18	0.130988	453.654	0.999094	689.525	1.06405	0.963641	0.943377	C1C1	c1s1
14	5	C1C1 rho c1s1 d128	SOE	30	4	SOE_30	r14c5	1112.31	0.140841	456.638	0.998769	655.671	1.03532	1.03613	0.89706	C1C1	c1s1
14	6	C1C1 rho c1s1 d128	SOE	30	4	SOE_30	r14c6	1095.92	0.144031	462.357	0.998304	633.567	1.02007	1.0596	0.866818	C1C1	c1s1
14	7	C1C1 rho c1s1 d128	SOE	30	4	SOE_30	r14c7	1103.27	0.143916	472.716	0.998061	630.556	1.0269	1.05875	0.862699	C1C1	c1s1
14	3	C1C1 rho c1s1 d128	SOE	30	4	SOE_30	r14c3	1244.25	0.125395	462.025	0.999033	782.228	1.15813	0.922495	1.07021	C1C1	c1s1
15	4	C1C1 rho c1s1 d128	SOE	30	4	SOE_30	r15c4	1207.84	0.131823	490.648	0.998761	717.194	1.12424	0.969786	0.981232	C1C1	c1s1
15	5	C1C1 rho c1s1 d128	SOE	30	4	SOE_30	r15c5	1087.02	0.142864	432.147	0.999011	654.869	1.01177	1.05101	0.895962	C1C1	c1s1
15	6	C1C1 rho c1s1 d128	SOE	30	4	SOE_30	r15c6	1150.8	0.144195	490.931	0.998111	659.868	1.07114	1.0608	0.902802	C1C1	c1s1
15	7	C1C1 rho c1s1 d128	SOE	30	4	SOE_30	r15c7	1071.96	0.155427	438.018	0.998922	633.938	0.997756	1.14343	0.867325	C1C1	c1s1
15	3	C1C1 rho c1s1 d128	SOE	30	4	SOE_30	r15c3	1226.91	0.127662	450.852	0.999427	776.058	1.14198	0.939172	1.06177	C1C1	c1s1
7	6	C1C1 rho c1e4 pr1	YPEG	37	3	YPEG_37	r7c6	2012.18	0.0511877	367.067	0.995222	1645.11	1.67434	0.718873	1.61952	C1C1	c1e4
7	7	C1C1 rho c1e4 pr1	YPEG	37	3	YPEG_37	r7c7	2046.99	0.0509146	385.472	0.995057	1661.51	1.7033	0.715038	1.63566	C1C1	c1e4
7	3	C1C1 rho c1e4 pr1	YPEG	37	3	YPEG_37	r7c3	2254.14	0.0488062	425.182	0.994732	1828.96	1.87568	0.685428	1.8005	C1C1	c1e4
7	5	C1C1 rho c1e4 pr1	YPEG	37	3	YPEG_37	r7c5	2289.7	0.049659	461.307	0.994402	1828.4	1.90527	0.697405	1.79995	C1C1	c1e4
7	4	C1C1 rho c1e4 pr1	YPEG	37	3	YPEG_37	r7c4	2134.61	0.0490747	396.223	0.994819	1738.38	1.77621	0.689198	1.71134	C1C1	c1e4
6	3	C1C1 rho c1e4 pr1	YPEG	37	3	YPEG_37	r6c3	2320.84	0.0478297	444.008	0.994875	1876.83	1.93118	0.671714	1.84763	C1C1	c1e4
6	4	C1C1 rho c1e4 pr1	YPEG	37	3	YPEG_37	r6c4	2235.1	0.0488327	420.231	0.995073	1814.87	1.85984	0.6858	1.78664	C1C1	c1e4
6	5	C1C1 rho c1e4 pr1	YPEG	37	3	YPEG_37	r6c5	2234.51	0.0501226	422.279	0.994283	1812.23	1.85934	0.703915	1.78403	C1C1	c1e4
6	6	C1C1 rho c1e4 pr1	YPEG	37	3	YPEG_37	r6c6	2165.53	0.0503499	409.747	0.994687	1755.78	1.80194	0.707107	1.72846	C1C1	c1e4
6	7	C1C1 rho c1e4 pr1	YPEG	37	3	YPEG_37	r6c7	2189.76	0.0506138	425.901	0.994957	1763.85	1.8221	0.710814	1.73641	C1C1	c1e4
18	26	C1C1 rho c1s1 d95	YPEG	37	4	YPEG_37	r18c26	2056.72	0.0591098	454.737	0.993333	1601.98	1.82988	0.868462	1.6574	C1C1	c1s1
18	27	C1C1 rho c1s1 d95	YPEG	37	4	YPEG_37	r18c27	2080.48	0.0588751	463.787	0.99298	1616.7	1.85103	0.865012	1.67263	C1C1	c1s1
18	28	C1C1 rho c1s1 d95	YPEG	37	4	YPEG_37	r18c28	2071.35	0.058398	463.047	0.99318	1608.3	1.8429	0.858003	1.66394	C1C1	c1s1
18	29	C1C1 rho c1s1 d95	YPEG	37	4	YPEG_37	r18c29	2017.65	0.0587381	441.033	0.993416	1576.62	1.79513	0.863001	1.63117	C1C1	c1s1
18	31	C1C1 rho c1s1 d95	YPEG	37	4	YPEG_37	r18c31	2061.65	0.0587775	460.823	0.993246	1600.83	1.83427	0.86358	1.65621	C1C1	c1s1
18	30	C1C1 rho c1s1 d95	YPEG	37	4	YPEG_37	r18c30	2062.67	0.0586209	459.377	0.992892	1603.3	1.83518	0.861278	1.65877	C1C1	c1s1
19	26	C1C1 rho c1s1 d95	YPEG	37	4	YPEG_37	r19c26	2033.85	0.0588013	443.302	0.993919	1590.55	1.80954	0.863928	1.64558	C1C1	c1s1
19	28	C1C1 rho c1s1 d95	YPEG	37	4	YPEG_37	r19c28	2009.7	0.0593977	436.163	0.99337	1573.53	1.78805	0.872691	1.62797	C1C1	c1s1
19	27	C1C1 rho c1s1 d95	YPEG	37	4	YPEG_37	r19c27	2054.84	0.0589793	452.295	0.993406	1602.55	1.82821	0.866543	1.65799	C1C1	c1s1
19	29	C1C1 rho c1s1 d95	YPEG	37	4	YPEG_37	r19c29	2018.35	0.059666	434.131	0.992938	1584.22	1.79575	0.876633	1.63903	C1C1	c1s1
19	30	C1C1 rho c1s1 d95	YPEG	37	4	YPEG_37	r19c30	2081.94	0.0584999	467.647	0.993348	1614.29	1.85232	0.859501	1.67014	C1C1	c1s1
19	31	C1C1 rho c1s1 d95	YPEG	37	4	YPEG_37	r19c31	2122.43	0.0589367	482.973	0.992761	1639.46	1.88835	0.865918	1.69618	C1C1	c1s1
6	21	C1C1 rho c1e1 pr21	YPD	30	2	YPD_30	r6c21	2249.81	0.118877	621.329	0.995195	1628.48	1.57277	0.59745	1.48078	C1C1	c1e1
6	20	C1C1 rho c1e1 pr21	YPD	30	2	YPD_30	r6c20	2295.01	0.116459	649.31	0.994483	1645.7	1.60437	0.585301	1.49644	C1C1	c1e1
6	23	C1C1 rho c1e1 pr21	YPD	30	2	YPD_30	r6c23	2274	0.117737	655.499	0.994923	1618.5	1.58968	0.591722	1.47171	C1C1	c1e1
6	22	C1C1 rho c1e1 pr21	YPD	30	2	YPD_30	r6c22	2215.75	0.116296	619.535	0.994696	1596.22	1.54896	0.584478	1.45145	C1C1	c1e1
6	19	C1C1 rho c1e1 pr21	YPD	30	2	YPD_30	r6c19	2274.04	0.117275	625.214	0.99445	1648.83	1.58971	0.589398	1.49929	C1C1	c1e1
6	18	C1C1 rho c1e1 pr21	YPD	30	2	YPD_30	r6c18	2277.65	0.117652	616.581	0.994678	1661.07	1.59224	0.591295	1.51042	C1C1	c1e1
7	20	C1C1 rho c1e1 pr21	YPD	30	2	YPD_30	r7c20	2268.42	0.119109	632.999	0.994573	1635.42	1.58578	0.598617	1.4871	C1C1	c1e1
7	19	C1C1 rho c1e1 pr21	YPD	30	2	YPD_30	r7c19	2241.4	0.120205	612.623	0.994177	1628.78	1.56689	0.604124	1.48106	C1C1	c1e1
7	18	C1C1 rho c1e1 pr21	YPD	30	2	YPD_30	r7c18	2284.12	0.117918	624.5	0.994554	1659.62	1.59675	0.592633	1.5091	C1C1	c1e1
7	21	C1C1 rho c1e1 pr21	YPD	30	2	YPD_30	r7c21	2276.27	0.118101	636.323	0.994706	1639.95	1.59127	0.593549	1.49121	C1C1	c1e1
7	23	C1C1 rho c1e1 pr21	YPD	30	2	YPD_30	r7c23	2217.16	0.117544	632.945	0.994696	1584.21	1.54994	0.590754	1.44053	C1C1	c1e1
7	22	C1C1 rho c1e1 pr21	YPD	30	2	YPD_30	r7c22	2253.93	0.117907	644.919	0.994925	1609.01	1.57565	0.592576	1.46308	C1C1	c1e1
22	21	C1C1 rho e1e4 pr69	YPD	37	6	YPD_37	r22c21	2277.76	0.0994129	788.726	0.987563	1489.03	1.42171	0.573366	1.21583	C1C1	e1e4
22	20	C1C1 rho e1e4 pr69	YPD	37	6	YPD_37	r22c20	2257.84	0.10026	774.031	0.987739	1483.81	1.40928	0.578249	1.21156	C1C1	e1e4
22	22	C1C1 rho e1e4 pr69	YPD	37	6	YPD_37	r22c22	2289.7	0.0987026	795.416	0.988335	1494.28	1.42916	0.569269	1.22011	C1C1	e1e4
22	18	C1C1 rho e1e4 pr69	YPD	37	6	YPD_37	r22c18	2294.81	0.0996167	791.872	0.988277	1502.93	1.43235	0.574541	1.22718	C1C1	e1e4
22	19	C1C1 rho e1e4 pr69	YPD	37	6	YPD_37	r22c19	2318.64	0.0990521	811.102	0.988658	1507.54	1.44723	0.571285	1.23094	C1C1	e1e4
22	23	C1C1 rho e1e4 pr69	YPD	37	6	YPD_37	r22c23	2287.94	0.100876	791.929	0.988315	1496.01	1.42807	0.581803	1.22152	C1C1	e1e4
23	18	C1C1 rho e1e4 pr69	YPD	37	6	YPD_37	r23c18	2279.01	0.100387	784.951	0.988378	1494.06	1.42249	0.578982	1.21993	C1C1	e1e4
23	21	C1C1 rho e1e4 pr69	YPD	37	6	YPD_37	r23c21	2345.29	0.0990948	831.714	0.988737	1513.58	1.46386	0.571531	1.23587	C1C1	e1e4
23	22	C1C1 rho e1e4 pr69	YPD	37	6	YPD_37	r23c22	2343.49	0.101517	819.85	0.988258	1523.64	1.46274	0.585503	1.24408	C1C1	e1e4
23	19	C1C1 rho e1e4 pr69	YPD	37	6	YPD_37	r23c19	2218.24	0.100081	747.083	0.987306	1471.16	1.38456	0.577219	1.20123	C1C1	e1e4
23	20	C1C1 rho e1e4 pr69	YPD	37	6	YPD_37	r23c20	2315.79	0.098602	807.982	0.987939	1507.81	1.44545	0.568689	1.23116	C1C1	e1e4
23	23	C1C1 rho e1e4 pr69	YPD	37	6	YPD_37	r23c23	2243.77	0.100095	766.392	0.98798	1477.38	1.4005	0.577299	1.20631	C1C1	e1e4
26	15	C1C1 rho c1e1 pr74	YPD	30	1	YPD_30	r26c15	2319.31	0.118827	689.352	0.994573	1629.96	1.73072	0.573284	1.67524	C1C1	c1e1
26	12	C1C1 rho c1e1 pr74	YPD	30	1	YPD_30	r26c12	2256.78	0.118536	702.315	0.994216	1554.47	1.68405	0.57188	1.59764	C1C1	c1e1
26	11	C1C1 rho c1e1 pr74	YPD	30	1	YPD_30	r26c11	2233.47	0.119278	686.629	0.994944	1546.84	1.66666	0.575461	1.58981	C1C1	c1e1
26	10	C1C1 rho c1e1 pr74	YPD	30	1	YPD_30	r26c10	2208.04	0.120011	678.613	0.99448	1529.42	1.64768	0.579	1.57191	C1C1	c1e1
26	14	C1C1 rho c1e1 pr74	YPD	30	1	YPD_30	r26c14	2347.87	0.11708	713.492	0.99505	1634.38	1.75203	0.564856	1.67978	C1C1	c1e1
26	13	C1C1 rho c1e1 pr74	YPD	30	1	YPD_30	r26c13	2269.92	0.11955	677.12	0.994463	1592.8	1.69386	0.576775	1.63704	C1C1	c1e1
27	10	C1C1 rho c1e1 pr74	YPD	30	1	YPD_30	r27c10	2217.29	0.117409	685.814	0.994509	1531.48	1.65458	0.566444	1.57402	C1C1	c1e1
27	13	C1C1 rho c1e1 pr74	YPD	30	1	YPD_30	r27c13	2296.67	0.117031	700.565	0.994724	1596.1	1.71382	0.56462	1.64044	C1C1	c1e1
27	12	C1C1 rho c1e1 pr74	YPD	30	1	YPD_30	r27c12	2256.8	0.117549	687.432	0.994505	1569.37	1.68407	0.567121	1.61296	C1C1	c1e1
27	11	C1C1 rho c1e1 pr74	YPD	30	1	YPD_30	r27c11	2197.55	0.118232	664.175	0.99446	1533.37	1.63985	0.570414	1.57597	C1C1	c1e1
27	14	C1C1 rho c1e1 pr74	YPD	30	1	YPD_30	r27c14	2350.51	0.118701	717.707	0.994406	1632.81	1.754	0.57268	1.67816	C1C1	c1e1
27	15	C1C1 rho c1e1 pr74	YPD	30	1	YPD_30	r27c15	2309.89	0.116928	701.75	0.994841	1608.14	1.72368	0.564123	1.65281	C1C1	c1e1
11	23	C1C1 rho c1e1 pr27	SOE	30	1	SOE_30	r11c23	1068.7	0.161778	456.968	0.999813	611.73	1.00702	1.18412	0.853954	C1C1	c1e1
11	22	C1C1 rho c1e1 pr27	SOE	30	1	SOE_30	r11c22	1093.11	0.162486	463.483	0.999842	629.63	1.03002	1.1893	0.878941	C1C1	c1e1
11	18	C1C1 rho c1e1 pr27	SOE	30	1	SOE_30	r11c18	1084.97	0.159165	466.563	0.999763	618.409	1.02235	1.16499	0.863277	C1C1	c1e1
11	19	C1C1 rho c1e1 pr27	SOE	30	1	SOE_30	r11c19	1096.01	0.157483	476.168	0.999395	619.841	1.03275	1.15268	0.865276	C1C1	c1e1
11	20	C1C1 rho c1e1 pr27	SOE	30	1	SOE_30	r11c20	1113.56	0.150447	495.18	0.999568	618.381	1.04929	1.10118	0.863238	C1C1	c1e1
11	21	C1C1 rho c1e1 pr27	SOE	30	1	SOE_30	r11c21	1087.66	0.156201	469.433	0.999691	618.224	1.02488	1.1433	0.863019	C1C1	c1e1
10	19	C1C1 rho c1e1 pr27	SOE	30	1	SOE_30	r10c19	1142.68	0.151505	489.002	0.999556	653.677	1.07673	1.10893	0.91251	C1C1	c1e1
10	20	C1C1 rho c1e1 pr27	SOE	30	1	SOE_30	r10c20	1136.8	0.151667	486.514	0.999574	650.291	1.07119	1.11011	0.907784	C1C1	c1e1
10	21	C1C1 rho c1e1 pr27	SOE	30	1	SOE_30	r10c21	1106.19	0.162978	445.95	0.999525	660.236	1.04234	1.1929	0.921666	C1C1	c1e1
10	22	C1C1 rho c1e1 pr27	SOE	30	1	SOE_30	r10c22	1140.78	0.15519	487.473	0.999629	653.308	1.07494	1.1359	0.911995	C1C1	c1e1
10	23	C1C1 rho c1e1 pr27	SOE	30	1	SOE_30	r10c23	1107.5	0.165133	458.828	0.999806	648.671	1.04358	1.20868	0.905522	C1C1	c1e1
10	18	C1C1 rho c1e1 pr27	SOE	30	1	SOE_30	r10c18	1121.17	0.158856	469.871	0.999681	651.296	1.05646	1.16273	0.909186	C1C1	c1e1
7	3	C1C1 rho c1e4 pr1	SOE	37	3	SOE_37	r7c3	1224.04	0.138396	429.5	0.997089	794.544	1.22007	1.04912	1.17207	C1C1	c1e4
7	4	C1C1 rho c1e4 pr1	SOE	37	3	SOE_37	r7c4	1159.83	0.151206	430.124	0.997083	729.703	1.15606	1.14622	1.07642	C1C1	c1e4
7	5	C1C1 rho c1e4 pr1	SOE	37	3	SOE_37	r7c5	1105.24	0.180898	373.522	0.995163	731.717	1.10165	1.37131	1.07939	C1C1	c1e4
6	6	C1C1 rho c1e4 pr1	SOE	37	3	SOE_37	r6c6	1048.76	0.179292	322.601	0.991408	726.161	1.04536	1.35913	1.0712	C1C1	c1e4
6	5	C1C1 rho c1e4 pr1	SOE	37	3	SOE_37	r6c5	1116.16	0.170879	347.867	0.991272	768.292	1.11253	1.29535	1.13335	C1C1	c1e4
6	7	C1C1 rho c1e4 pr1	SOE	37	3	SOE_37	r6c7	1050.37	0.188633	336.687	0.992005	713.685	1.04696	1.42994	1.05279	C1C1	c1e4
6	4	C1C1 rho c1e4 pr1	SOE	37	3	SOE_37	r6c4	1183.06	0.146533	404.425	0.993924	778.638	1.17922	1.1108	1.14861	C1C1	c1e4
6	3	C1C1 rho c1e4 pr1	SOE	37	3	SOE_37	r6c3	1179.23	0.144255	343.739	0.991958	835.491	1.1754	1.09354	1.23247	C1C1	c1e4
7	7	C1C1 rho c1e4 pr1	SOE	37	3	SOE_37	r7c7	1060.88	0.19033	371.178	0.996669	689.701	1.05743	1.4428	1.01741	C1C1	c1e4
7	6	C1C1 rho c1e4 pr1	SOE	37	3	SOE_37	r7c6	1133.06	0.171871	428.977	0.997958	704.081	1.12938	1.30287	1.03863	C1C1	c1e4
27	28	C1C1 rho c1e1 pr82	YPD	30	2	YPD_30	r27c28	2266.49	0.117607	692.066	0.994382	1574.42	1.58443	0.591071	1.43163	C1C1	c1e1
27	27	C1C1 rho c1e1 pr82	YPD	30	2	YPD_30	r27c27	2235.26	0.116393	668.457	0.994095	1566.81	1.5626	0.584968	1.4247	C1C1	c1e1
27	26	C1C1 rho c1e1 pr82	YPD	30	2	YPD_30	r27c26	2281.81	0.115091	698.592	0.994309	1583.22	1.59514	0.578424	1.43963	C1C1	c1e1
27	30	C1C1 rho c1e1 pr82	YPD	30	2	YPD_30	r27c30	2188.58	0.117265	669.185	0.99436	1519.39	1.52997	0.58935	1.38159	C1C1	c1e1
27	29	C1C1 rho c1e1 pr82	YPD	30	2	YPD_30	r27c29	2234.5	0.116719	684.279	0.994253	1550.22	1.56207	0.586607	1.40962	C1C1	c1e1
27	31	C1C1 rho c1e1 pr82	YPD	30	2	YPD_30	r27c31	2233.92	0.116007	693.041	0.994508	1540.88	1.56166	0.583029	1.40113	C1C1	c1e1
26	28	C1C1 rho c1e1 pr82	YPD	30	2	YPD_30	r26c28	2248.6	0.11587	693.843	0.994366	1554.76	1.57192	0.582337	1.41375	C1C1	c1e1
26	27	C1C1 rho c1e1 pr82	YPD	30	2	YPD_30	r26c27	2257.3	0.116204	691.537	0.994488	1565.76	1.57801	0.584015	1.42375	C1C1	c1e1
26	26	C1C1 rho c1e1 pr82	YPD	30	2	YPD_30	r26c26	2239.03	0.11744	674.542	0.994767	1564.49	1.56524	0.59023	1.4226	C1C1	c1e1
26	30	C1C1 rho c1e1 pr82	YPD	30	2	YPD_30	r26c30	2215.62	0.117697	683.274	0.994422	1532.34	1.54887	0.591521	1.39337	C1C1	c1e1
26	29	C1C1 rho c1e1 pr82	YPD	30	2	YPD_30	r26c29	2243.43	0.118098	694.128	0.994311	1549.3	1.56831	0.593537	1.40878	C1C1	c1e1
26	31	C1C1 rho c1e1 pr82	YPD	30	2	YPD_30	r26c31	2195.26	0.118493	670.719	0.993984	1524.54	1.53464	0.595522	1.38627	C1C1	c1e1
11	13	C1C1 rho e1e4 pr32	SOE	30	6	SOE_30	r11c13	1003.2	0.149074	433.635	0.999127	569.569	0.866809	1.39976	0.758427	C1C1	e1e4
11	14	C1C1 rho e1e4 pr32	SOE	30	6	SOE_30	r11c14	1023.11	0.138708	469.671	0.998467	553.443	0.884012	1.30242	0.736954	C1C1	e1e4
11	15	C1C1 rho e1e4 pr32	SOE	30	6	SOE_30	r11c15	1008.61	0.143432	454.635	0.998391	553.977	0.871481	1.34678	0.737664	C1C1	e1e4
11	10	C1C1 rho e1e4 pr32	SOE	30	6	SOE_30	r11c10	1035.43	0.135944	480.689	0.998543	554.74	0.894652	1.27647	0.738681	C1C1	e1e4
11	11	C1C1 rho e1e4 pr32	SOE	30	6	SOE_30	r11c11	1047.44	0.138249	489.708	0.998929	557.73	0.905028	1.29811	0.742662	C1C1	e1e4
11	12	C1C1 rho e1e4 pr32	SOE	30	6	SOE_30	r11c12	1023.38	0.141766	461.007	0.999197	562.375	0.884243	1.33114	0.748847	C1C1	e1e4
10	13	C1C1 rho e1e4 pr32	SOE	30	6	SOE_30	r10c13	1036.09	0.139176	478.74	0.998929	557.352	0.895226	1.30682	0.742159	C1C1	e1e4
10	14	C1C1 rho e1e4 pr32	SOE	30	6	SOE_30	r10c14	1065.48	0.13761	501.388	0.99808	564.089	0.920615	1.29211	0.75113	C1C1	e1e4
10	15	C1C1 rho e1e4 pr32	SOE	30	6	SOE_30	r10c15	1041.02	0.141835	479.091	0.998657	561.927	0.899481	1.33178	0.74825	C1C1	e1e4
10	11	C1C1 rho e1e4 pr32	SOE	30	6	SOE_30	r10c11	1036.18	0.135334	484.742	0.998411	551.441	0.895304	1.27074	0.734287	C1C1	e1e4
10	12	C1C1 rho e1e4 pr32	SOE	30	6	SOE_30	r10c12	1024.84	0.13735	477.852	0.998526	546.984	0.885499	1.28967	0.728353	C1C1	e1e4
10	10	C1C1 rho e1e4 pr32	SOE	30	6	SOE_30	r10c10	1005.13	0.136449	456.3	0.99876	548.834	0.868476	1.28121	0.730816	C1C1	e1e4
6	15	C1C1 rho e1e4 pr14	YPD	30	5	YPD_30	r6c15	2285.14	0.0992608	717.204	0.992227	1567.94	1.5916	0.529161	1.57109	C1C1	e1e4
6	11	C1C1 rho e1e4 pr14	YPD	30	5	YPD_30	r6c11	2255.11	0.0965867	697.8	0.991346	1557.31	1.57068	0.514905	1.56043	C1C1	e1e4
6	10	C1C1 rho e1e4 pr14	YPD	30	5	YPD_30	r6c10	2265.25	0.09416	707.454	0.991218	1557.8	1.57775	0.501968	1.56092	C1C1	e1e4
6	14	C1C1 rho e1e4 pr14	YPD	30	5	YPD_30	r6c14	2245.95	0.0986924	695.527	0.991936	1550.42	1.5643	0.52613	1.55353	C1C1	e1e4
6	13	C1C1 rho e1e4 pr14	YPD	30	5	YPD_30	r6c13	2261.03	0.0977701	701.51	0.991896	1559.52	1.5748	0.521214	1.56265	C1C1	e1e4
6	12	C1C1 rho e1e4 pr14	YPD	30	5	YPD_30	r6c12	2276.56	0.0970797	706.607	0.991222	1569.96	1.58562	0.517533	1.57311	C1C1	e1e4
7	12	C1C1 rho e1e4 pr14	YPD	30	5	YPD_30	r7c12	2233.54	0.0987918	690.662	0.991947	1542.88	1.55566	0.52666	1.54597	C1C1	e1e4
7	11	C1C1 rho e1e4 pr14	YPD	30	5	YPD_30	r7c11	2233.03	0.0989217	687.825	0.992078	1545.2	1.5553	0.527353	1.5483	C1C1	e1e4
7	10	C1C1 rho e1e4 pr14	YPD	30	5	YPD_30	r7c10	2232.13	0.0974112	696.259	0.990803	1535.87	1.55467	0.5193	1.53895	C1C1	e1e4
7	14	C1C1 rho e1e4 pr14	YPD	30	5	YPD_30	r7c14	2245.7	0.100049	700.009	0.992124	1545.7	1.56413	0.533362	1.5488	C1C1	e1e4
7	13	C1C1 rho e1e4 pr14	YPD	30	5	YPD_30	r7c13	2201.88	0.101986	675.196	0.991738	1526.68	1.53361	0.54369	1.52974	C1C1	e1e4
7	15	C1C1 rho e1e4 pr14	YPD	30	5	YPD_30	r7c15	2249.4	0.100858	696.088	0.991818	1553.31	1.5667	0.537675	1.55643	C1C1	e1e4
27	7	C1C1 rho e1e4 pr79	SOE	37	6	SOE_37	r27c7	990.394	0.167607	416.939	0.999261	573.455	0.981375	1.34225	0.8397	C1C1	e1e4
26	3	C1C1 rho e1e4 pr79	SOE	37	6	SOE_37	r26c3	1142.21	0.14341	437.045	0.999214	705.169	1.13181	1.14848	1.03257	C1C1	e1e4
27	5	C1C1 rho e1e4 pr79	SOE	37	6	SOE_37	r27c5	1062.21	0.162078	445.698	0.999345	616.515	1.05254	1.29798	0.902752	C1C1	e1e4
26	5	C1C1 rho e1e4 pr79	SOE	37	6	SOE_37	r26c5	1004.76	0.174869	379.546	0.998239	625.217	0.995614	1.40041	0.915494	C1C1	e1e4
27	3	C1C1 rho e1e4 pr79	SOE	37	6	SOE_37	r27c3	1112.85	0.15006	405.153	0.999015	707.695	1.10271	1.20173	1.03627	C1C1	e1e4
27	4	C1C1 rho e1e4 pr79	SOE	37	6	SOE_37	r27c4	1056.5	0.15626	423.578	0.999107	632.921	1.04688	1.25138	0.926775	C1C1	e1e4
26	4	C1C1 rho e1e4 pr79	SOE	37	6	SOE_37	r26c4	1068.87	0.152677	431.367	0.999139	637.5	1.05913	1.22269	0.93348	C1C1	e1e4
27	6	C1C1 rho e1e4 pr79	SOE	37	6	SOE_37	r27c6	1000.95	0.158796	429.983	0.999337	570.971	0.99184	1.2717	0.836063	C1C1	e1e4
26	7	C1C1 rho e1e4 pr79	SOE	37	6	SOE_37	r26c7	1010.81	0.170073	425.524	0.99921	585.284	1.0016	1.36201	0.857021	C1C1	e1e4
26	6	C1C1 rho e1e4 pr79	SOE	37	6	SOE_37	r26c6	1001.93	0.182824	387.127	0.99897	614.804	0.992808	1.46412	0.900247	C1C1	e1e4
27	42	C1C1 rho c1e1 pr78	YPEG	30	1	YPEG_30	r27c42	2838.75	0.0656178	448.454	0.998381	2390.3	1.92819	1.07973	1.86858	C1C1	c1e1
26	43	C1C1 rho c1e1 pr78	YPEG	30	1	YPEG_30	r26c43	2850.84	0.0649162	449.687	0.998394	2401.15	1.9364	1.06819	1.87707	C1C1	c1e1
26	42	C1C1 rho c1e1 pr78	YPEG	30	1	YPEG_30	r26c42	2864.64	0.0644355	462.933	0.998494	2401.71	1.94577	1.06028	1.8775	C1C1	c1e1
26	46	C1C1 rho c1e1 pr78	YPEG	30	1	YPEG_30	r26c46	3120.58	0.0612085	456.764	0.998439	2663.82	2.11962	1.00718	2.0824	C1C1	c1e1
26	45	C1C1 rho c1e1 pr78	YPEG	30	1	YPEG_30	r26c45	2990.56	0.0622755	449.197	0.998223	2541.37	2.03131	1.02474	1.98668	C1C1	c1e1
26	44	C1C1 rho c1e1 pr78	YPEG	30	1	YPEG_30	r26c44	2989.33	0.0613999	480.822	0.998635	2508.51	2.03047	1.01033	1.961	C1C1	c1e1
27	46	C1C1 rho c1e1 pr78	YPEG	30	1	YPEG_30	r27c46	3085.77	0.06096	441.357	0.99857	2644.41	2.09597	1.00309	2.06723	C1C1	c1e1
27	45	C1C1 rho c1e1 pr78	YPEG	30	1	YPEG_30	r27c45	3021.17	0.0619557	459.145	0.998234	2562.02	2.05209	1.01947	2.00283	C1C1	c1e1
27	44	C1C1 rho c1e1 pr78	YPEG	30	1	YPEG_30	r27c44	2892.9	0.0639716	445.805	0.997897	2447.09	1.96497	1.05264	1.91298	C1C1	c1e1
27	43	C1C1 rho c1e1 pr78	YPEG	30	1	YPEG_30	r27c43	2916.91	0.0635708	466.667	0.998227	2450.24	1.98128	1.04605	1.91544	C1C1	c1e1
10	42	C1C1 rho e1e4 pr30	YPD	37	5	YPD_37	r10c42	2450.17	0.0938872	791.609	0.992395	1658.56	1.49857	0.531567	1.36379	C1C1	e1e4
10	44	C1C1 rho e1e4 pr30	YPD	37	5	YPD_37	r10c44	2506.1	0.0928772	799.757	0.992269	1706.35	1.53278	0.525849	1.40308	C1C1	e1e4
10	43	C1C1 rho e1e4 pr30	YPD	37	5	YPD_37	r10c43	2547.98	0.0927402	840.691	0.991824	1707.29	1.5584	0.525073	1.40386	C1C1	e1e4
10	45	C1C1 rho e1e4 pr30	YPD	37	5	YPD_37	r10c45	2676.58	0.0915168	808.505	0.993771	1868.08	1.63705	0.518146	1.53607	C1C1	e1e4
10	46	C1C1 rho e1e4 pr30	YPD	37	5	YPD_37	r10c46	2772.01	0.0884316	782.51	0.993399	1989.5	1.69541	0.500679	1.63591	C1C1	e1e4
11	44	C1C1 rho e1e4 pr30	YPD	37	5	YPD_37	r11c44	2505.11	0.0937134	800.818	0.992731	1704.29	1.53217	0.530583	1.40139	C1C1	e1e4
11	45	C1C1 rho e1e4 pr30	YPD	37	5	YPD_37	r11c45	2683.01	0.0908667	818.815	0.993759	1864.19	1.64098	0.514466	1.53287	C1C1	e1e4
11	42	C1C1 rho e1e4 pr30	YPD	37	5	YPD_37	r11c42	2434.89	0.0954092	803.577	0.991487	1631.31	1.48922	0.540185	1.34138	C1C1	e1e4
11	43	C1C1 rho e1e4 pr30	YPD	37	5	YPD_37	r11c43	2474.09	0.0948506	815.816	0.99184	1658.28	1.5132	0.537022	1.36356	C1C1	e1e4
11	46	C1C1 rho e1e4 pr30	YPD	37	5	YPD_37	r11c46	2892.14	0.0872492	813.28	0.994066	2078.86	1.76889	0.493984	1.70939	C1C1	e1e4
6	38	C1C1 rho c1e1 pr23	SOE	37	2	SOE_37	r6c38	1128.14	0.232066	354.67	0.997247	773.472	1.09819	1.65543	1.09697	C1C1	c1e1
6	37	C1C1 rho c1e1 pr23	SOE	37	2	SOE_37	r6c37	1087.65	0.230278	333.142	0.997746	754.508	1.05877	1.64268	1.07008	C1C1	c1e1
6	39	C1C1 rho c1e1 pr23	SOE	37	2	SOE_37	r6c39	1109.62	0.229917	356.828	0.99747	752.791	1.08016	1.6401	1.06764	C1C1	c1e1
6	35	C1C1 rho c1e1 pr23	SOE	37	2	SOE_37	r6c35	1148.85	0.227309	357.968	0.997787	790.881	1.11835	1.6215	1.12166	C1C1	c1e1
6	36	C1C1 rho c1e1 pr23	SOE	37	2	SOE_37	r6c36	1117.17	0.23429	351.765	0.997759	765.408	1.08751	1.6713	1.08554	C1C1	c1e1
6	34	C1C1 rho c1e1 pr23	SOE	37	2	SOE_37	r6c34	1168.95	0.224001	374.937	0.997961	794.012	1.13792	1.5979	1.1261	C1C1	c1e1
7	39	C1C1 rho c1e1 pr23	SOE	37	2	SOE_37	r7c39	1103.93	0.236119	339.217	0.997602	764.709	1.07462	1.68435	1.08455	C1C1	c1e1
7	36	C1C1 rho c1e1 pr23	SOE	37	2	SOE_37	r7c36	1189.82	0.222527	399.306	0.998444	790.512	1.15823	1.58739	1.12114	C1C1	c1e1
7	34	C1C1 rho c1e1 pr23	SOE	37	2	SOE_37	r7c34	1094.68	0.226294	343.282	0.998368	751.401	1.06562	1.61426	1.06567	C1C1	c1e1
7	35	C1C1 rho c1e1 pr23	SOE	37	2	SOE_37	r7c35	1157.38	0.219218	398.879	0.998497	758.496	1.12665	1.56378	1.07573	C1C1	c1e1
7	38	C1C1 rho c1e1 pr23	SOE	37	2	SOE_37	r7c38	1175.49	0.234325	382.559	0.997747	792.935	1.14429	1.67155	1.12458	C1C1	c1e1
7	37	C1C1 rho c1e1 pr23	SOE	37	2	SOE_37	r7c37	1143.28	0.226336	369.059	0.998084	774.222	1.11293	1.61456	1.09804	C1C1	c1e1
30	10	C1C1 rho e1e4 pr86	YPD	30	5	YPD_30	r30c10	2316.96	0.0995625	722.245	0.993495	1594.71	1.61376	0.530769	1.59791	C1C1	e1e4
30	12	C1C1 rho e1e4 pr86	YPD	30	5	YPD_30	r30c12	2327.52	0.0996187	723.852	0.993862	1603.66	1.62111	0.531068	1.60688	C1C1	e1e4
30	11	C1C1 rho e1e4 pr86	YPD	30	5	YPD_30	r30c11	2296.64	0.0999667	701.119	0.99382	1595.52	1.5996	0.532924	1.59872	C1C1	e1e4
30	14	C1C1 rho e1e4 pr86	YPD	30	5	YPD_30	r30c14	2341.71	0.0990214	718.924	0.993301	1622.78	1.631	0.527884	1.62604	C1C1	e1e4
30	13	C1C1 rho e1e4 pr86	YPD	30	5	YPD_30	r30c13	2289.2	0.100399	705.241	0.993811	1583.96	1.59443	0.535227	1.58714	C1C1	e1e4
30	15	C1C1 rho e1e4 pr86	YPD	30	5	YPD_30	r30c15	2384.06	0.101042	728.732	0.992807	1655.32	1.66049	0.538657	1.65864	C1C1	e1e4
30	19	C1C1 rho C1 control 2	YPEG	30	3	YPEG_30	r30c19	2917.97	0.0681674	406.507	0.998955	2511.46	1.93688	1.07627	1.93413	C1C1	c1
30	18	C1C1 rho C1 control 2	YPEG	30	3	YPEG_30	r30c18	2873.84	0.0682244	392.608	0.998833	2481.23	1.90759	1.07717	1.91085	C1C1	c1
30	23	C1C1 rho C1 control 2	YPEG	30	3	YPEG_30	r30c23	2805.34	0.0690182	359.106	0.999133	2446.24	1.86212	1.08971	1.8839	C1C1	c1
30	22	C1C1 rho C1 control 2	YPEG	30	3	YPEG_30	r30c22	2927.14	0.0682421	392.935	0.998929	2534.2	1.94297	1.07745	1.95164	C1C1	c1
30	21	C1C1 rho C1 control 2	YPEG	30	3	YPEG_30	r30c21	2925.83	0.0679883	405.887	0.998891	2519.94	1.9421	1.07345	1.94066	C1C1	c1
30	20	C1C1 rho C1 control 2	YPEG	30	3	YPEG_30	r30c20	2833.02	0.0676835	379.613	0.999045	2453.4	1.88049	1.06863	1.88942	C1C1	c1
19	20	C1C1 rho c1e4 pr57	SOE	37	3	SOE_37	r19c20	1152.04	0.183496	498.392	0.998789	653.651	1.1483	1.391	0.964234	C1C1	c1e4
19	21	C1C1 rho c1e4 pr57	SOE	37	3	SOE_37	r19c21	1073.05	0.186949	445.046	0.9984	628.009	1.06957	1.41718	0.926408	C1C1	c1e4
19	19	C1C1 rho c1e4 pr57	SOE	37	3	SOE_37	r19c19	938.764	0.230804	299.69	0.997618	639.074	0.935715	1.74962	0.942729	C1C1	c1e4
19	23	C1C1 rho c1e4 pr57	SOE	37	3	SOE_37	r19c23	1132.6	0.189331	480.214	0.998597	652.386	1.12892	1.43523	0.962368	C1C1	c1e4
19	22	C1C1 rho c1e4 pr57	SOE	37	3	SOE_37	r19c22	1095.03	0.190654	454.711	0.998415	640.317	1.09147	1.44527	0.944564	C1C1	c1e4
19	18	C1C1 rho c1e4 pr57	SOE	37	3	SOE_37	r19c18	1113.78	0.191004	463.558	0.998779	650.227	1.11017	1.44791	0.959182	C1C1	c1e4
18	20	C1C1 rho c1e4 pr57	SOE	37	3	SOE_37	r18c20	1070.8	0.191888	433.924	0.998288	636.879	1.06733	1.45462	0.939491	C1C1	c1e4
18	19	C1C1 rho c1e4 pr57	SOE	37	3	SOE_37	r18c19	1099.55	0.188449	456.788	0.998709	642.762	1.09598	1.42855	0.948171	C1C1	c1e4
18	22	C1C1 rho c1e4 pr57	SOE	37	3	SOE_37	r18c22	1015.7	0.215448	363.616	0.99783	652.081	1.0124	1.63322	0.961918	C1C1	c1e4
18	23	C1C1 rho c1e4 pr57	SOE	37	3	SOE_37	r18c23	1073.42	0.196777	425.562	0.998431	647.856	1.06993	1.49168	0.955685	C1C1	c1e4
18	21	C1C1 rho c1e4 pr57	SOE	37	3	SOE_37	r18c21	1073.93	0.197397	425.522	0.998761	648.404	1.07044	1.49637	0.956493	C1C1	c1e4
18	18	C1C1 rho c1e4 pr57	SOE	37	3	SOE_37	r18c18	1032.4	0.216521	371.002	0.998379	661.394	1.02904	1.64135	0.975655	C1C1	c1e4
18	19	C1C1 rho c1s1 d92	YPEG	30	4	YPEG_30	r18c19	2759.5	0.069079	447.633	0.998738	2311.86	1.91655	1.06565	1.82385	C1C1	c1s1
19	23	C1C1 rho c1s1 d92	YPEG	30	4	YPEG_30	r19c23	2794.98	0.0684155	458.711	0.99874	2336.27	1.94119	1.05542	1.8431	C1C1	c1s1
19	22	C1C1 rho c1s1 d92	YPEG	30	4	YPEG_30	r19c22	2749.74	0.069134	447.04	0.998824	2302.7	1.90978	1.0665	1.81663	C1C1	c1s1
19	21	C1C1 rho c1s1 d92	YPEG	30	4	YPEG_30	r19c21	2754.94	0.0693268	447.896	0.998779	2307.04	1.91338	1.06948	1.82005	C1C1	c1s1
19	20	C1C1 rho c1s1 d92	YPEG	30	4	YPEG_30	r19c20	2858.69	0.0678028	490.396	0.999123	2368.29	1.98544	1.04597	1.86837	C1C1	c1s1
19	19	C1C1 rho c1s1 d92	YPEG	30	4	YPEG_30	r19c19	2716.82	0.0692386	431.449	0.998826	2285.37	1.88691	1.06812	1.80295	C1C1	c1s1
19	18	C1C1 rho c1s1 d92	YPEG	30	4	YPEG_30	r19c18	2790.37	0.0681331	463.227	0.998951	2327.14	1.93799	1.05106	1.8359	C1C1	c1s1
18	18	C1C1 rho c1s1 d92	YPEG	30	4	YPEG_30	r18c18	2758.37	0.0686601	450.902	0.998861	2307.47	1.91577	1.05919	1.82039	C1C1	c1s1
18	23	C1C1 rho c1s1 d92	YPEG	30	4	YPEG_30	r18c23	2820.54	0.0685228	463.026	0.998894	2357.51	1.95894	1.05707	1.85986	C1C1	c1s1
18	22	C1C1 rho c1s1 d92	YPEG	30	4	YPEG_30	r18c22	2778.53	0.0690212	450.089	0.99893	2328.44	1.92977	1.06476	1.83693	C1C1	c1s1
18	21	C1C1 rho c1s1 d92	YPEG	30	4	YPEG_30	r18c21	2820.77	0.0680966	470.941	0.998978	2349.83	1.95911	1.0505	1.8538	C1C1	c1s1
18	20	C1C1 rho c1s1 d92	YPEG	30	4	YPEG_30	r18c20	2796.34	0.0684458	461.083	0.998932	2335.25	1.94214	1.05589	1.8423	C1C1	c1s1
30	3	C1C1 rho E1 control 1	YPEG	30	6	YPEG_30	r30c3	3268.36	0.0589472	476.979	0.998713	2791.38	2.19482	0.946996	2.13973	C1C1	e1
30	7	C1C1 rho E1 control 1	YPEG	30	6	YPEG_30	r30c7	3064.54	0.0619538	455.916	0.99779	2608.62	2.05794	0.995298	1.99963	C1C1	e1
30	6	C1C1 rho E1 control 1	YPEG	30	6	YPEG_30	r30c6	3143.58	0.0613447	485.593	0.998512	2657.98	2.11102	0.985511	2.03747	C1C1	e1
30	5	C1C1 rho E1 control 1	YPEG	30	6	YPEG_30	r30c5	3041.27	0.0612456	438.757	0.998131	2602.51	2.04231	0.98392	1.99494	C1C1	e1
30	4	C1C1 rho E1 control 1	YPEG	30	6	YPEG_30	r30c4	3157.31	0.0600235	477.434	0.999028	2679.88	2.12024	0.964287	2.05425	C1C1	e1
3	28	C1C1 rho c1e1 pr 10	YPD	37	2	YPD_37	r3c28	2484.4	0.1177	695.449	0.986438	1788.95	1.53116	0.6794	1.45754	C1C1	c1e1
3	29	C1C1 rho c1e1 pr 10	YPD	37	2	YPD_37	r3c29	2472.68	0.118425	682.772	0.986074	1789.91	1.52393	0.683581	1.45832	C1C1	c1e1
3	26	C1C1 rho c1e1 pr 10	YPD	37	2	YPD_37	r3c26	2455.62	0.115627	670.629	0.986692	1785	1.51342	0.667433	1.45432	C1C1	c1e1
3	27	C1C1 rho c1e1 pr 10	YPD	37	2	YPD_37	r3c27	2471.1	0.11707	672.9	0.985918	1798.2	1.52296	0.67576	1.46508	C1C1	c1e1
3	30	C1C1 rho c1e1 pr 10	YPD	37	2	YPD_37	r3c30	2459.79	0.116927	669.521	0.986016	1790.27	1.51599	0.674938	1.45861	C1C1	c1e1
7	34	C1C1 rho e1e4 pr17	YPEG	30	5	YPEG_30	r7c34	2975.52	0.064167	434.819	0.998737	2540.7	1.97815	1.01062	1.9167	C1C1	e1e4
7	39	C1C1 rho e1e4 pr17	YPEG	30	5	YPEG_30	r7c39	2948.22	0.0631799	471.343	0.999062	2476.88	1.96001	0.99507	1.86855	C1C1	e1e4
7	38	C1C1 rho e1e4 pr17	YPEG	30	5	YPEG_30	r7c38	3021.45	0.0616539	498.273	0.999444	2523.18	2.00869	0.971036	1.90348	C1C1	e1e4
7	37	C1C1 rho e1e4 pr17	YPEG	30	5	YPEG_30	r7c37	2958.74	0.0633953	461.301	0.998892	2497.44	1.967	0.998462	1.88406	C1C1	e1e4
7	36	C1C1 rho e1e4 pr17	YPEG	30	5	YPEG_30	r7c36	2972.08	0.0645524	458.623	0.998699	2513.46	1.97587	1.01669	1.89615	C1C1	e1e4
7	35	C1C1 rho e1e4 pr17	YPEG	30	5	YPEG_30	r7c35	3021.18	0.0634043	469.211	0.998983	2551.97	2.00851	0.998604	1.9252	C1C1	e1e4
6	39	C1C1 rho e1e4 pr17	YPEG	30	5	YPEG_30	r6c39	3044.94	0.0612467	493.879	0.999397	2551.06	2.02431	0.964622	1.92452	C1C1	e1e4
6	38	C1C1 rho e1e4 pr17	YPEG	30	5	YPEG_30	r6c38	3022.34	0.06259	472.804	0.998893	2549.54	2.00928	0.985779	1.92337	C1C1	e1e4
6	37	C1C1 rho e1e4 pr17	YPEG	30	5	YPEG_30	r6c37	2953.97	0.063941	453.794	0.998702	2500.18	1.96383	1.00706	1.88613	C1C1	e1e4
6	36	C1C1 rho e1e4 pr17	YPEG	30	5	YPEG_30	r6c36	3029.52	0.0624989	480.224	0.999114	2549.29	2.01405	0.984345	1.92318	C1C1	e1e4
6	35	C1C1 rho e1e4 pr17	YPEG	30	5	YPEG_30	r6c35	2975.45	0.0651409	458.845	0.998944	2516.6	1.97811	1.02596	1.89852	C1C1	e1e4
6	34	C1C1 rho e1e4 pr17	YPEG	30	5	YPEG_30	r6c34	2972.41	0.0639707	428.535	0.998829	2543.87	1.97609	1.00753	1.9191	C1C1	e1e4
10	46	C1C1 rho c1e1 pr30	YPEG	30	1	YPEG_30	r10c46	3231.11	0.0597359	478.397	0.999166	2752.71	2.19469	0.982948	2.15189	C1C1	c1e1
10	45	C1C1 rho c1e1 pr30	YPEG	30	1	YPEG_30	r10c45	3109.24	0.0611718	469.95	0.998752	2639.29	2.11192	1.00658	2.06323	C1C1	c1e1
10	44	C1C1 rho c1e1 pr30	YPEG	30	1	YPEG_30	r10c44	3087.66	0.062768	468.634	0.998587	2619.03	2.09726	1.03284	2.04739	C1C1	c1e1
10	43	C1C1 rho c1e1 pr30	YPEG	30	1	YPEG_30	r10c43	3225.1	0.0606835	506.239	0.99948	2718.86	2.19061	0.998541	2.12543	C1C1	c1e1
11	45	C1C1 rho c1e1 pr30	YPEG	30	1	YPEG_30	r11c45	3104.55	0.0626718	467.719	0.998882	2636.83	2.10873	1.03126	2.06131	C1C1	c1e1
11	44	C1C1 rho c1e1 pr30	YPEG	30	1	YPEG_30	r11c44	3049.98	0.0635299	465.347	0.998779	2584.63	2.07166	1.04538	2.0205	C1C1	c1e1
11	43	C1C1 rho c1e1 pr30	YPEG	30	1	YPEG_30	r11c43	3065.9	0.063438	444.722	0.998654	2621.17	2.08248	1.04387	2.04907	C1C1	c1e1
11	42	C1C1 rho c1e1 pr30	YPEG	30	1	YPEG_30	r11c42	3238.66	0.0629149	447.677	0.998866	2790.99	2.19982	1.03526	2.18182	C1C1	c1e1
11	46	C1C1 rho c1e1 pr30	YPEG	30	1	YPEG_30	r11c46	3290.02	0.0589538	499.438	0.999552	2790.58	2.23471	0.970078	2.1815	C1C1	c1e1
26	18	C1C1 rho c1e1 pr75	YPD	30	1	YPD_30	r26c18	2422.22	0.115389	724.494	0.994584	1697.72	1.8075	0.556698	1.74488	C1C1	c1e1
26	20	C1C1 rho c1e1 pr75	YPD	30	1	YPD_30	r26c20	2495.69	0.114973	740.801	0.994612	1754.89	1.86233	0.554692	1.80364	C1C1	c1e1
26	19	C1C1 rho c1e1 pr75	YPD	30	1	YPD_30	r26c19	2391.12	0.116894	694.834	0.994202	1696.28	1.7843	0.56396	1.7434	C1C1	c1e1
26	22	C1C1 rho c1e1 pr75	YPD	30	1	YPD_30	r26c22	2416.05	0.115241	690.64	0.993543	1725.41	1.8029	0.555985	1.77334	C1C1	c1e1
26	21	C1C1 rho c1e1 pr75	YPD	30	1	YPD_30	r26c21	2438.86	0.116043	703.334	0.994056	1735.52	1.81992	0.559854	1.78373	C1C1	c1e1
26	23	C1C1 rho c1e1 pr75	YPD	30	1	YPD_30	r26c23	2484.97	0.114944	720.879	0.993817	1764.09	1.85433	0.554552	1.8131	C1C1	c1e1
27	23	C1C1 rho c1e1 pr75	YPD	30	1	YPD_30	r27c23	2422.7	0.116304	671.078	0.993736	1751.62	1.80786	0.561112	1.80027	C1C1	c1e1
27	19	C1C1 rho c1e1 pr75	YPD	30	1	YPD_30	r27c19	2432.09	0.114869	714.853	0.994401	1717.24	1.81487	0.554192	1.76494	C1C1	c1e1
27	18	C1C1 rho c1e1 pr75	YPD	30	1	YPD_30	r27c18	2438.57	0.115494	737.194	0.994469	1701.38	1.81971	0.557208	1.74863	C1C1	c1e1
27	21	C1C1 rho c1e1 pr75	YPD	30	1	YPD_30	r27c21	2475.65	0.115327	715.106	0.994328	1760.55	1.84738	0.556401	1.80945	C1C1	c1e1
27	20	C1C1 rho c1e1 pr75	YPD	30	1	YPD_30	r27c20	2451.13	0.11509	716.015	0.994263	1735.12	1.82908	0.555255	1.78332	C1C1	c1e1
27	22	C1C1 rho c1e1 pr75	YPD	30	1	YPD_30	r27c22	2458.16	0.116072	697.628	0.993805	1760.54	1.83433	0.559997	1.80944	C1C1	c1e1
10	10	C1C1 rho c1e1 pr32	SOE	30	2	SOE_30	r10c10	1135.48	0.203817	345.758	0.997939	789.719	1.0081	1.29801	0.983659	C1C1	c1e1
11	13	C1C1 rho c1e1 pr32	SOE	30	2	SOE_30	r11c13	1148.13	0.208503	331.049	0.997783	817.079	1.01934	1.32786	1.01774	C1C1	c1e1
11	14	C1C1 rho c1e1 pr32	SOE	30	2	SOE_30	r11c14	1181.95	0.191315	373.724	0.998903	808.221	1.04936	1.2184	1.00671	C1C1	c1e1
11	15	C1C1 rho c1e1 pr32	SOE	30	2	SOE_30	r11c15	1150.86	0.201089	349.671	0.998401	801.184	1.02176	1.28065	0.997941	C1C1	c1e1
11	10	C1C1 rho c1e1 pr32	SOE	30	2	SOE_30	r11c10	1188.95	0.195324	376.607	0.997773	812.344	1.05558	1.24393	1.01184	C1C1	c1e1
11	11	C1C1 rho c1e1 pr32	SOE	30	2	SOE_30	r11c11	1222.41	0.186883	408.003	0.998322	814.408	1.08529	1.19017	1.01441	C1C1	c1e1
11	12	C1C1 rho c1e1 pr32	SOE	30	2	SOE_30	r11c12	1190.89	0.207382	357.347	0.997849	833.541	1.0573	1.32072	1.03824	C1C1	c1e1
10	13	C1C1 rho c1e1 pr32	SOE	30	2	SOE_30	r10c13	1128.56	0.202017	344.205	0.997845	784.353	1.00196	1.28655	0.976976	C1C1	c1e1
10	14	C1C1 rho c1e1 pr32	SOE	30	2	SOE_30	r10c14	1186.62	0.20058	375.562	0.998392	811.053	1.0535	1.2774	1.01023	C1C1	c1e1
10	15	C1C1 rho c1e1 pr32	SOE	30	2	SOE_30	r10c15	1150.7	0.201733	353.713	0.998052	796.985	1.02162	1.28475	0.992711	C1C1	c1e1
10	11	C1C1 rho c1e1 pr32	SOE	30	2	SOE_30	r10c11	1168.97	0.207935	361.841	0.998106	807.125	1.03784	1.32425	1.00534	C1C1	c1e1
10	12	C1C1 rho c1e1 pr32	SOE	30	2	SOE_30	r10c12	1152.97	0.204082	351.552	0.998205	801.418	1.02363	1.2997	0.998232	C1C1	c1e1
23	36	C1C1 rho c1e1 pr71	SOE	30	2	SOE_30	r23c36	1181.4	0.193142	408.237	0.998348	773.165	1.04888	1.23003	0.963041	C1C1	c1e1
23	37	C1C1 rho c1e1 pr71	SOE	30	2	SOE_30	r23c37	1137.77	0.200099	376.688	0.998018	761.084	1.01014	1.27434	0.947992	C1C1	c1e1
23	38	C1C1 rho c1e1 pr71	SOE	30	2	SOE_30	r23c38	1204.64	0.213343	396.105	0.998239	808.532	1.06951	1.35868	1.00709	C1C1	c1e1
23	39	C1C1 rho c1e1 pr71	SOE	30	2	SOE_30	r23c39	1125.56	0.20391	368.892	0.998069	756.665	0.999296	1.29861	0.942488	C1C1	c1e1
23	34	C1C1 rho c1e1 pr71	SOE	30	2	SOE_30	r23c34	1195.94	0.20797	384.339	0.998041	811.597	1.06178	1.32447	1.01091	C1C1	c1e1
23	35	C1C1 rho c1e1 pr71	SOE	30	2	SOE_30	r23c35	1157.99	0.192461	394.711	0.998594	763.279	1.02809	1.22569	0.950727	C1C1	c1e1
22	36	C1C1 rho c1e1 pr71	SOE	30	2	SOE_30	r22c36	1200.15	0.19529	403.5	0.998363	796.647	1.06552	1.24371	0.99229	C1C1	c1e1
22	37	C1C1 rho c1e1 pr71	SOE	30	2	SOE_30	r22c37	1099.21	0.21024	338.375	0.998046	760.84	0.975908	1.33892	0.947689	C1C1	c1e1
22	38	C1C1 rho c1e1 pr71	SOE	30	2	SOE_30	r22c38	1193.87	0.208861	392.164	0.998192	801.708	1.05995	1.33014	0.998593	C1C1	c1e1
22	39	C1C1 rho c1e1 pr71	SOE	30	2	SOE_30	r22c39	1159.49	0.199004	392.92	0.998458	766.566	1.02942	1.26736	0.954821	C1C1	c1e1
22	34	C1C1 rho c1e1 pr71	SOE	30	2	SOE_30	r22c34	1163.49	0.20506	374.508	0.998321	788.984	1.03298	1.30594	0.982744	C1C1	c1e1
22	35	C1C1 rho c1e1 pr71	SOE	30	2	SOE_30	r22c35	1197.99	0.195948	406.847	0.998386	791.143	1.0636	1.2479	0.985434	C1C1	c1e1
3	19	C1C1 rho c1s1 d91	YPEG	37	4	YPEG_37	r3c19	1895.1	0.0548994	363.169	0.994519	1531.93	1.68609	0.806601	1.58493	C1C1	c1s1
3	18	C1C1 rho c1s1 d91	YPEG	37	4	YPEG_37	r3c18	1939.04	0.0550881	370.342	0.994135	1568.7	1.72518	0.809373	1.62297	C1C1	c1s1
3	20	C1C1 rho c1s1 d91	YPEG	37	4	YPEG_37	r3c20	1991.24	0.0547837	396.365	0.994457	1594.88	1.77162	0.804901	1.65005	C1C1	c1s1
3	21	C1C1 rho c1s1 d91	YPEG	37	4	YPEG_37	r3c21	1911.66	0.0545607	369.222	0.994606	1542.44	1.70082	0.801624	1.5958	C1C1	c1s1
3	22	C1C1 rho c1s1 d91	YPEG	37	4	YPEG_37	r3c22	1836.94	0.0544252	343.624	0.994633	1493.32	1.63435	0.799633	1.54498	C1C1	c1s1
3	23	C1C1 rho c1s1 d91	YPEG	37	4	YPEG_37	r3c23	1738.1	0.055046	311.944	0.995183	1426.16	1.54641	0.808754	1.4755	C1C1	c1s1
14	30	C1C1 rho e1e4 pr40	YPD	37	5	YPD_37	r14c30	2379.09	0.0995137	844.136	0.989112	1534.96	1.4551	0.563423	1.26215	C1C1	e1e4
14	31	C1C1 rho e1e4 pr40	YPD	37	5	YPD_37	r14c31	2393.6	0.0981548	849.213	0.989916	1544.38	1.46397	0.555729	1.2699	C1C1	e1e4
15	27	C1C1 rho e1e4 pr40	YPD	37	5	YPD_37	r15c27	2357.21	0.099488	825.567	0.989036	1531.64	1.44172	0.563277	1.25943	C1C1	e1e4
15	29	C1C1 rho e1e4 pr40	YPD	37	5	YPD_37	r15c29	2318.34	0.0992592	822.587	0.989399	1495.76	1.41794	0.561982	1.22992	C1C1	e1e4
15	28	C1C1 rho e1e4 pr40	YPD	37	5	YPD_37	r15c28	2312.22	0.0997894	805.339	0.988506	1506.88	1.4142	0.564984	1.23907	C1C1	e1e4
15	26	C1C1 rho e1e4 pr40	YPD	37	5	YPD_37	r15c26	2336.27	0.10027	817.739	0.989545	1518.53	1.42891	0.567705	1.24865	C1C1	e1e4
15	31	C1C1 rho e1e4 pr40	YPD	37	5	YPD_37	r15c31	2376.88	0.0990199	834.732	0.98877	1542.14	1.45374	0.560628	1.26806	C1C1	e1e4
15	30	C1C1 rho e1e4 pr40	YPD	37	5	YPD_37	r15c30	2350.26	0.0991165	826.304	0.988934	1523.96	1.43747	0.561175	1.25311	C1C1	e1e4
14	29	C1C1 rho e1e4 pr40	YPD	37	5	YPD_37	r14c29	2309.75	0.100826	800.747	0.988758	1509	1.41269	0.570854	1.24081	C1C1	e1e4
14	26	C1C1 rho e1e4 pr40	YPD	37	5	YPD_37	r14c26	2300.57	0.100848	793.273	0.988093	1507.3	1.40707	0.570976	1.23941	C1C1	e1e4
14	28	C1C1 rho e1e4 pr40	YPD	37	5	YPD_37	r14c28	2359.37	0.098893	829.918	0.988555	1529.46	1.44304	0.559909	1.25763	C1C1	e1e4
14	27	C1C1 rho e1e4 pr40	YPD	37	5	YPD_37	r14c27	2351.51	0.0992558	827.205	0.989262	1524.31	1.43823	0.561963	1.2534	C1C1	e1e4
11	38	C1C1 rho e1e4 pr29	SOE	37	5	SOE_37	r11c38	1060.99	0.175056	433.315	0.998786	627.678	1.02279	1.36764	0.912267	C1C1	e1e4
11	37	C1C1 rho e1e4 pr29	SOE	37	5	SOE_37	r11c37	1021.21	0.184881	394.693	0.998458	626.52	0.984444	1.4444	0.910584	C1C1	e1e4
11	39	C1C1 rho e1e4 pr29	SOE	37	5	SOE_37	r11c39	982.586	0.188079	365.432	0.998423	617.154	0.947209	1.46938	0.896972	C1C1	e1e4
11	34	C1C1 rho e1e4 pr29	SOE	37	5	SOE_37	r11c34	1077.39	0.183866	425.538	0.998793	651.856	1.0386	1.43647	0.947407	C1C1	e1e4
11	35	C1C1 rho e1e4 pr29	SOE	37	5	SOE_37	r11c35	995.403	0.19949	352.317	0.998533	643.086	0.959564	1.55854	0.934661	C1C1	e1e4
10	39	C1C1 rho e1e4 pr29	SOE	37	5	SOE_37	r10c39	1054.38	0.169709	436.544	0.998888	617.84	1.01642	1.32587	0.897969	C1C1	e1e4
11	36	C1C1 rho e1e4 pr29	SOE	37	5	SOE_37	r11c36	1074.12	0.178435	429.25	0.999257	644.872	1.03545	1.39405	0.937256	C1C1	e1e4
10	36	C1C1 rho e1e4 pr29	SOE	37	5	SOE_37	r10c36	1074.2	0.176282	428.185	0.998997	646.016	1.03552	1.37722	0.938919	C1C1	e1e4
10	35	C1C1 rho e1e4 pr29	SOE	37	5	SOE_37	r10c35	1141.35	0.173482	472.376	0.99926	668.978	1.10026	1.35535	0.972292	C1C1	e1e4
10	38	C1C1 rho e1e4 pr29	SOE	37	5	SOE_37	r10c38	1060	0.182469	419.375	0.998934	640.622	1.02183	1.42556	0.93108	C1C1	e1e4
10	37	C1C1 rho e1e4 pr29	SOE	37	5	SOE_37	r10c37	1005.04	0.190823	374.347	0.998582	630.689	0.96885	1.49082	0.916643	C1C1	e1e4
10	34	C1C1 rho e1e4 pr29	SOE	37	5	SOE_37	r10c34	1108.75	0.177208	445.657	0.998903	663.088	1.06883	1.38446	0.963732	C1C1	e1e4
18	26	C1C1 rho e1e4 pr58	YPD	37	6	YPD_37	r18c26	2478.95	0.0973996	817.025	0.991259	1661.93	1.54729	0.561754	1.357	C1C1	e1e4
18	28	C1C1 rho e1e4 pr58	YPD	37	6	YPD_37	r18c28	2493.24	0.0970422	827.572	0.991151	1665.66	1.55621	0.559693	1.36005	C1C1	e1e4
18	27	C1C1 rho e1e4 pr58	YPD	37	6	YPD_37	r18c27	2489.46	0.0982812	818.087	0.990788	1671.38	1.55385	0.566839	1.36471	C1C1	e1e4
18	31	C1C1 rho e1e4 pr58	YPD	37	6	YPD_37	r18c31	2516.88	0.0951122	833.753	0.990449	1683.13	1.57096	0.548561	1.37431	C1C1	e1e4
18	29	C1C1 rho e1e4 pr58	YPD	37	6	YPD_37	r18c29	2459.41	0.097009	805.922	0.990614	1653.49	1.53509	0.559501	1.35011	C1C1	e1e4
18	30	C1C1 rho e1e4 pr58	YPD	37	6	YPD_37	r18c30	2504.77	0.0958276	823.578	0.990725	1681.19	1.5634	0.552688	1.37273	C1C1	e1e4
19	27	C1C1 rho e1e4 pr58	YPD	37	6	YPD_37	r19c27	2490.29	0.0977927	826.803	0.990567	1663.49	1.55437	0.564021	1.35827	C1C1	e1e4
19	28	C1C1 rho e1e4 pr58	YPD	37	6	YPD_37	r19c28	2424.72	0.0964038	790.782	0.99112	1633.94	1.51344	0.556011	1.33415	C1C1	e1e4
19	26	C1C1 rho e1e4 pr58	YPD	37	6	YPD_37	r19c26	2488.22	0.0973839	827.08	0.990967	1661.14	1.55307	0.561664	1.35636	C1C1	e1e4
19	31	C1C1 rho e1e4 pr58	YPD	37	6	YPD_37	r19c31	2462.55	0.0960184	798.104	0.990119	1664.45	1.53705	0.553788	1.35906	C1C1	e1e4
19	29	C1C1 rho e1e4 pr58	YPD	37	6	YPD_37	r19c29	2455.79	0.0972298	797.752	0.990767	1658.04	1.53284	0.560775	1.35383	C1C1	e1e4
19	30	C1C1 rho e1e4 pr58	YPD	37	6	YPD_37	r19c30	2459.57	0.0967812	799.037	0.990894	1660.54	1.53519	0.558187	1.35586	C1C1	e1e4
30	7	C1C1 rho c1e1 pr91	YPEG	30	2	YPEG_30	r30c7	2778.71	0.0656166	429.901	0.998521	2348.81	1.97783	1.05557	1.91622	C1C1	c1e1
30	6	C1C1 rho c1e1 pr91	YPEG	30	2	YPEG_30	r30c6	2910.8	0.0639972	465.872	0.998684	2444.93	2.07185	1.02952	1.99464	C1C1	c1e1
30	5	C1C1 rho c1e1 pr91	YPEG	30	2	YPEG_30	r30c5	2764.18	0.065668	402.26	0.998741	2361.93	1.96749	1.0564	1.92692	C1C1	c1e1
30	4	C1C1 rho c1e1 pr91	YPEG	30	2	YPEG_30	r30c4	2924.09	0.064239	442.254	0.998477	2481.83	2.0813	1.03341	2.02475	C1C1	c1e1
30	3	C1C1 rho c1e1 pr91	YPEG	30	2	YPEG_30	r30c3	2969.28	0.06282	419.851	0.998698	2549.43	2.11347	1.01059	2.07989	C1C1	c1e1
15	3	C1C1 rho c1e1 pr37	YPEG	30	1	YPEG_30	r15c3	3101.51	0.0632831	426.255	0.998796	2675.26	2.10667	1.04132	2.09135	C1C1	c1e1
15	7	C1C1 rho c1e1 pr37	YPEG	30	1	YPEG_30	r15c7	2770.81	0.0677837	400.646	0.998662	2370.16	1.88204	1.11537	1.85284	C1C1	c1e1
15	6	C1C1 rho c1e1 pr37	YPEG	30	1	YPEG_30	r15c6	2776.34	0.0677457	392.062	0.998757	2384.28	1.8858	1.11475	1.86388	C1C1	c1e1
15	5	C1C1 rho c1e1 pr37	YPEG	30	1	YPEG_30	r15c5	2905.16	0.0659376	420.362	0.998618	2484.8	1.9733	1.085	1.94246	C1C1	c1e1
15	4	C1C1 rho c1e1 pr37	YPEG	30	1	YPEG_30	r15c4	3024.26	0.0638629	441.231	0.998665	2583.03	2.05419	1.05086	2.01925	C1C1	c1e1
14	5	C1C1 rho c1e1 pr37	YPEG	30	1	YPEG_30	r14c5	2844.35	0.0664439	403.922	0.998679	2440.42	1.93199	1.09333	1.90777	C1C1	c1e1
14	4	C1C1 rho c1e1 pr37	YPEG	30	1	YPEG_30	r14c4	2943.71	0.0652077	408.731	0.998704	2534.98	1.99948	1.07299	1.98169	C1C1	c1e1
14	3	C1C1 rho c1e1 pr37	YPEG	30	1	YPEG_30	r14c3	3059.03	0.0632674	416.987	0.998889	2642.04	2.07781	1.04106	2.06538	C1C1	c1e1
14	7	C1C1 rho c1e1 pr37	YPEG	30	1	YPEG_30	r14c7	2782.88	0.0680654	400.378	0.998629	2382.5	1.89024	1.12001	1.86249	C1C1	c1e1
14	6	C1C1 rho c1e1 pr37	YPEG	30	1	YPEG_30	r14c6	2818.18	0.0671579	408.365	0.998646	2409.81	1.91422	1.10508	1.88384	C1C1	c1e1
23	18	C1C1 rho c1e1 pr69	YPEG	37	2	YPEG_37	r23c18	2604.47	0.052057	422.875	0.996848	2181.6	2.20246	0.76472	2.14855	C1C1	c1e1
23	19	C1C1 rho c1e1 pr69	YPEG	37	2	YPEG_37	r23c19	2772.23	0.0511579	479.444	0.996658	2292.79	2.34433	0.751513	2.25806	C1C1	c1e1
23	21	C1C1 rho c1e1 pr69	YPEG	37	2	YPEG_37	r23c21	2668.91	0.0531071	446.583	0.997001	2222.33	2.25696	0.780147	2.18867	C1C1	c1e1
23	20	C1C1 rho c1e1 pr69	YPEG	37	2	YPEG_37	r23c20	2734.44	0.0515833	468.605	0.996521	2265.84	2.31237	0.757762	2.23152	C1C1	c1e1
23	22	C1C1 rho c1e1 pr69	YPEG	37	2	YPEG_37	r23c22	2699.52	0.052662	453.802	0.996637	2245.72	2.28284	0.773609	2.21171	C1C1	c1e1
23	23	C1C1 rho c1e1 pr69	YPEG	37	2	YPEG_37	r23c23	2695.7	0.051915	452.509	0.996677	2243.19	2.27961	0.762635	2.20921	C1C1	c1e1
22	18	C1C1 rho c1e1 pr69	YPEG	37	2	YPEG_37	r22c18	2648.56	0.0518797	433.972	0.99703	2214.58	2.23974	0.762117	2.18104	C1C1	c1e1
22	19	C1C1 rho c1e1 pr69	YPEG	37	2	YPEG_37	r22c19	2576.5	0.0520772	413.909	0.997003	2162.59	2.17881	0.765018	2.12984	C1C1	c1e1
22	20	C1C1 rho c1e1 pr69	YPEG	37	2	YPEG_37	r22c20	2680.91	0.0518684	448.45	0.996614	2232.46	2.2671	0.761951	2.19865	C1C1	c1e1
22	21	C1C1 rho c1e1 pr69	YPEG	37	2	YPEG_37	r22c21	2495.68	0.0528858	388.037	0.99716	2107.64	2.11046	0.776897	2.07572	C1C1	c1e1
22	23	C1C1 rho c1e1 pr69	YPEG	37	2	YPEG_37	r22c23	2716.44	0.0521055	458.017	0.996538	2258.42	2.29715	0.765434	2.22421	C1C1	c1e1
22	22	C1C1 rho c1e1 pr69	YPEG	37	2	YPEG_37	r22c22	2657.7	0.0527061	436.378	0.996821	2221.32	2.24748	0.774256	2.18768	C1C1	c1e1
30	39	C1C1 rho E4 control 2	YPD	37	6	YPD_37	r30c39	2446.16	0.100529	777.195	0.98993	1668.96	1.52682	0.579805	1.36274	C1C1	e4
30	35	C1C1 rho E4 control 2	YPD	37	6	YPD_37	r30c35	2537.99	0.0973634	852.744	0.9914	1685.25	1.58414	0.561546	1.37604	C1C1	e4
30	36	C1C1 rho E4 control 2	YPD	37	6	YPD_37	r30c36	2487.74	0.0996345	815.161	0.990204	1672.58	1.55278	0.574644	1.3657	C1C1	e4
30	34	C1C1 rho E4 control 2	YPD	37	6	YPD_37	r30c34	2504.87	0.101468	817.692	0.990186	1687.18	1.56347	0.585216	1.37762	C1C1	e4
30	38	C1C1 rho E4 control 2	YPD	37	6	YPD_37	r30c38	2470.75	0.0992068	799.787	0.990091	1670.96	1.54217	0.572177	1.36438	C1C1	e4
30	37	C1C1 rho E4 control 2	YPD	37	6	YPD_37	r30c37	2593.56	0.0966142	886.276	0.991173	1707.29	1.61883	0.557224	1.39404	C1C1	e4
11	45	C1C1 rho c1s1 d110	SOE	30	4	SOE_30	r11c45	1132.17	0.137416	481.926	0.999146	650.245	1.0538	1.01093	0.889636	C1C1	c1s1
11	46	C1C1 rho c1s1 d110	SOE	30	4	SOE_30	r11c46	1255.21	0.120106	520.704	0.999058	734.504	1.16832	0.883587	1.00492	C1C1	c1s1
11	42	C1C1 rho c1s1 d110	SOE	30	4	SOE_30	r11c42	1075.61	0.15059	482.908	0.998928	592.702	1.00116	1.10785	0.810909	C1C1	c1s1
11	43	C1C1 rho c1s1 d110	SOE	30	4	SOE_30	r11c43	1054.74	0.148984	459.231	0.999476	595.512	0.981734	1.09604	0.814752	C1C1	c1s1
11	44	C1C1 rho c1s1 d110	SOE	30	4	SOE_30	r11c44	1133.95	0.138201	511.27	0.999265	622.681	1.05546	1.01671	0.851923	C1C1	c1s1
10	43	C1C1 rho c1s1 d110	SOE	30	4	SOE_30	r10c43	1125.54	0.144959	516.964	0.999064	608.578	1.04763	1.06643	0.832629	C1C1	c1s1
10	44	C1C1 rho c1s1 d110	SOE	30	4	SOE_30	r10c44	1103.86	0.141586	487.563	0.999151	616.293	1.02745	1.04161	0.843184	C1C1	c1s1
10	45	C1C1 rho c1s1 d110	SOE	30	4	SOE_30	r10c45	1140.73	0.13186	498.19	0.998665	642.543	1.06177	0.970058	0.879099	C1C1	c1s1
10	46	C1C1 rho c1s1 d110	SOE	30	4	SOE_30	r10c46	1224.04	0.121087	503.28	0.999315	720.761	1.13931	0.890806	0.986113	C1C1	c1s1
10	42	C1C1 rho c1s1 d110	SOE	30	4	SOE_30	r10c42	1046.73	0.149409	469.899	0.999056	576.833	0.974278	1.09916	0.789197	C1C1	c1s1
7	23	C1C1 rho e1e4 pr15	YPEG	37	5	YPEG_37	r7c23	2928.96	0.0552628	438.515	0.998042	2490.45	2.4811	0.800683	2.45095	C1C1	e1e4
7	18	C1C1 rho e1e4 pr15	YPEG	37	5	YPEG_37	r7c18	2966.24	0.0550569	441.988	0.997955	2524.25	2.51268	0.797699	2.48421	C1C1	e1e4
7	19	C1C1 rho e1e4 pr15	YPEG	37	5	YPEG_37	r7c19	2895.75	0.0552783	429.587	0.997864	2466.16	2.45297	0.800907	2.42705	C1C1	e1e4
7	20	C1C1 rho e1e4 pr15	YPEG	37	5	YPEG_37	r7c20	2949.59	0.0553907	450.115	0.997704	2499.48	2.49858	0.802535	2.45983	C1C1	e1e4
7	21	C1C1 rho e1e4 pr15	YPEG	37	5	YPEG_37	r7c21	2923.15	0.0548391	431	0.997976	2492.15	2.47618	0.794544	2.45262	C1C1	e1e4
7	22	C1C1 rho e1e4 pr15	YPEG	37	5	YPEG_37	r7c22	2978.64	0.0542924	461.6	0.997754	2517.04	2.52318	0.786622	2.47712	C1C1	e1e4
6	19	C1C1 rho e1e4 pr15	YPEG	37	5	YPEG_37	r6c19	3046.07	0.0547885	475.336	0.998062	2570.73	2.5803	0.793811	2.52996	C1C1	e1e4
6	18	C1C1 rho e1e4 pr15	YPEG	37	5	YPEG_37	r6c18	3094.29	0.0536502	482.696	0.997818	2611.59	2.62115	0.777319	2.57017	C1C1	e1e4
6	20	C1C1 rho e1e4 pr15	YPEG	37	5	YPEG_37	r6c20	3019.92	0.055209	467.199	0.998095	2552.72	2.55815	0.799904	2.51223	C1C1	e1e4
6	21	C1C1 rho e1e4 pr15	YPEG	37	5	YPEG_37	r6c21	3022.78	0.0540871	459.995	0.997871	2562.78	2.56057	0.783648	2.52214	C1C1	e1e4
6	22	C1C1 rho e1e4 pr15	YPEG	37	5	YPEG_37	r6c22	2964.43	0.0541295	443.375	0.997936	2521.06	2.51115	0.784262	2.48107	C1C1	e1e4
6	23	C1C1 rho e1e4 pr15	YPEG	37	5	YPEG_37	r6c23	3015.43	0.0548425	465.186	0.998064	2550.25	2.55435	0.794593	2.5098	C1C1	e1e4
3	26	C1C1 rho c1e1 pr 4	YPEG	37	1	YPEG_37	r3c26	1933.34	0.0554739	352.917	0.995372	1580.42	1.5539	0.818498	1.47984	C1C1	c1e1
3	28	C1C1 rho c1e1 pr 4	YPEG	37	1	YPEG_37	r3c28	1927.84	0.0548353	358.61	0.995563	1569.23	1.54948	0.809075	1.46936	C1C1	c1e1
3	27	C1C1 rho c1e1 pr 4	YPEG	37	1	YPEG_37	r3c27	1922.82	0.0552958	352.155	0.995526	1570.66	1.54545	0.81587	1.4707	C1C1	c1e1
3	29	C1C1 rho c1e1 pr 4	YPEG	37	1	YPEG_37	r3c29	1901.55	0.0554329	346.023	0.995542	1555.52	1.52835	0.817893	1.45653	C1C1	c1e1
3	31	C1C1 rho c1e1 pr 4	YPEG	37	1	YPEG_37	r3c31	1932.15	0.0551015	360.342	0.995636	1571.81	1.55295	0.813003	1.47177	C1C1	c1e1
26	18	C1C1 rho c1e1 pr75	YPEG	37	1	YPEG_37	r26c18	2671.32	0.0506281	447.505	0.996769	2223.82	2.14705	0.747	2.08229	C1C1	c1e1
26	19	C1C1 rho c1e1 pr75	YPEG	37	1	YPEG_37	r26c19	2671.26	0.0507586	447.693	0.997282	2223.56	2.147	0.748924	2.08205	C1C1	c1e1
26	20	C1C1 rho c1e1 pr75	YPEG	37	1	YPEG_37	r26c20	2654.78	0.0504655	440.931	0.99719	2213.85	2.13375	0.744601	2.07296	C1C1	c1e1
26	21	C1C1 rho c1e1 pr75	YPEG	37	1	YPEG_37	r26c21	2638.28	0.0504584	434.202	0.997167	2204.07	2.12049	0.744495	2.0638	C1C1	c1e1
26	23	C1C1 rho c1e1 pr75	YPEG	37	1	YPEG_37	r26c23	2624.09	0.0502493	428.146	0.997319	2195.94	2.10909	0.74141	2.05619	C1C1	c1e1
26	22	C1C1 rho c1e1 pr75	YPEG	37	1	YPEG_37	r26c22	2632.4	0.0509011	432.401	0.997413	2200	2.11576	0.751027	2.05998	C1C1	c1e1
27	23	C1C1 rho c1e1 pr75	YPEG	37	1	YPEG_37	r27c23	2618.58	0.0503115	413.874	0.997429	2204.71	2.10466	0.742329	2.0644	C1C1	c1e1
27	19	C1C1 rho c1e1 pr75	YPEG	37	1	YPEG_37	r27c19	2725.87	0.0501322	464.779	0.997043	2261.09	2.19089	0.739683	2.11719	C1C1	c1e1
27	18	C1C1 rho c1e1 pr75	YPEG	37	1	YPEG_37	r27c18	2681.35	0.0498761	447.378	0.997247	2233.97	2.15511	0.735904	2.0918	C1C1	c1e1
27	20	C1C1 rho c1e1 pr75	YPEG	37	1	YPEG_37	r27c20	2568.89	0.0502153	409.296	0.997692	2159.59	2.06472	0.740909	2.02215	C1C1	c1e1
27	21	C1C1 rho c1e1 pr75	YPEG	37	1	YPEG_37	r27c21	2690	0.0501328	438.906	0.997267	2251.09	2.16206	0.739691	2.10783	C1C1	c1e1
27	22	C1C1 rho c1e1 pr75	YPEG	37	1	YPEG_37	r27c22	2740.57	0.0498937	460.058	0.997389	2280.51	2.20271	0.736164	2.13537	C1C1	c1e1
23	26	C1C1 rho e1e4 pr64	YPEG	37	5	YPEG_37	r23c26	2965.21	0.0564316	501.146	0.997386	2464.07	2.51181	0.817617	2.42499	C1C1	e1e4
23	27	C1C1 rho e1e4 pr64	YPEG	37	5	YPEG_37	r23c27	2970.83	0.0551236	493.123	0.997336	2477.71	2.51657	0.798666	2.43841	C1C1	e1e4
23	29	C1C1 rho e1e4 pr64	YPEG	37	5	YPEG_37	r23c29	3045.22	0.0549588	511.096	0.997505	2534.12	2.57958	0.796278	2.49393	C1C1	e1e4
23	28	C1C1 rho e1e4 pr64	YPEG	37	5	YPEG_37	r23c28	2889.72	0.0556235	467.73	0.997226	2421.99	2.44786	0.805909	2.38358	C1C1	e1e4
23	30	C1C1 rho e1e4 pr64	YPEG	37	5	YPEG_37	r23c30	3055.83	0.0546454	500.658	0.997368	2555.18	2.58857	0.791737	2.51465	C1C1	e1e4
23	31	C1C1 rho e1e4 pr64	YPEG	37	5	YPEG_37	r23c31	3027.88	0.0548627	482.848	0.997577	2545.04	2.5649	0.794885	2.50467	C1C1	e1e4
22	30	C1C1 rho e1e4 pr64	YPEG	37	5	YPEG_37	r22c30	3011.63	0.0550612	491.154	0.997312	2520.48	2.55113	0.797762	2.4805	C1C1	e1e4
22	31	C1C1 rho e1e4 pr64	YPEG	37	5	YPEG_37	r22c31	2787.89	0.0552078	403.275	0.997649	2384.62	2.3616	0.799886	2.3468	C1C1	e1e4
22	26	C1C1 rho e1e4 pr64	YPEG	37	5	YPEG_37	r22c26	2904.14	0.0562937	476.406	0.997405	2427.73	2.46008	0.815619	2.38923	C1C1	e1e4
22	27	C1C1 rho e1e4 pr64	YPEG	37	5	YPEG_37	r22c27	2954.29	0.054775	487.035	0.997355	2467.26	2.50256	0.793615	2.42813	C1C1	e1e4
22	28	C1C1 rho e1e4 pr64	YPEG	37	5	YPEG_37	r22c28	2865	0.0559529	459.142	0.997575	2405.86	2.42692	0.810681	2.3677	C1C1	e1e4
22	29	C1C1 rho e1e4 pr64	YPEG	37	5	YPEG_37	r22c29	2977.8	0.0549393	485.514	0.996953	2492.28	2.52247	0.795995	2.45275	C1C1	e1e4
22	3	C1C1 rho c1e4 pr49	SOE	30	3	SOE_30	r22c3	1268.04	0.164001	374.408	0.996399	893.637	1.14928	1.10937	1.13941	C1C1	c1e4
22	4	C1C1 rho c1e4 pr49	SOE	30	3	SOE_30	r22c4	1235.91	0.173647	387.381	0.997389	848.531	1.12016	1.17461	1.0819	C1C1	c1e4
22	5	C1C1 rho c1e4 pr49	SOE	30	3	SOE_30	r22c5	1197.85	0.190956	382.282	0.997089	815.564	1.08566	1.2917	1.03986	C1C1	c1e4
22	6	C1C1 rho c1e4 pr49	SOE	30	3	SOE_30	r22c6	1184.84	0.181937	406.293	0.998338	778.548	1.07387	1.23069	0.992666	C1C1	c1e4
23	6	C1C1 rho c1e4 pr49	SOE	30	3	SOE_30	r23c6	1155.97	0.197464	365.975	0.997577	789.997	1.04771	1.33572	1.00726	C1C1	c1e4
23	7	C1C1 rho c1e4 pr49	SOE	30	3	SOE_30	r23c7	1093.37	0.189197	353.838	0.998292	739.532	0.990966	1.2798	0.942919	C1C1	c1e4
23	3	C1C1 rho c1e4 pr49	SOE	30	3	SOE_30	r23c3	1186.28	0.159124	349.383	0.997396	836.895	1.07517	1.07637	1.06706	C1C1	c1e4
23	4	C1C1 rho c1e4 pr49	SOE	30	3	SOE_30	r23c4	1223.01	0.162446	408.279	0.998074	814.732	1.10846	1.09884	1.0388	C1C1	c1e4
23	5	C1C1 rho c1e4 pr49	SOE	30	3	SOE_30	r23c5	1124.71	0.176381	363.552	0.997871	761.163	1.01938	1.19311	0.970499	C1C1	c1e4
22	7	C1C1 rho c1e4 pr49	SOE	30	3	SOE_30	r22c7	1136.04	0.197597	365.758	0.99813	770.285	1.02964	1.33662	0.98213	C1C1	c1e4
30	45	C1C1 rho E1 control 3	YPD	37	2	YPD_37	r30c45	2780.66	0.0941392	748.22	0.986424	2032.44	1.71374	0.543399	1.65592	C1C1	e1
30	44	C1C1 rho E1 control 3	YPD	37	2	YPD_37	r30c44	2535.04	0.101488	678.94	0.985779	1856.1	1.56237	0.585817	1.51225	C1C1	e1
30	46	C1C1 rho E1 control 3	YPD	37	2	YPD_37	r30c46	2760.46	0.0888239	681.903	0.987342	2078.56	1.70129	0.512717	1.69349	C1C1	e1
30	43	C1C1 rho E1 control 3	YPD	37	2	YPD_37	r30c43	2497.06	0.1052	681.619	0.986459	1815.44	1.53896	0.607242	1.47912	C1C1	e1
30	42	C1C1 rho E1 control 3	YPD	37	2	YPD_37	r30c42	2555.55	0.107117	720.626	0.987512	1834.92	1.575	0.618307	1.49499	C1C1	e1
19	14	C1C1 rho c1e4 pr56	SOE	37	3	SOE_37	r19c14	1050.43	0.220699	392.863	0.998286	657.563	1.04702	1.67302	0.970004	C1C1	c1e4
19	15	C1C1 rho c1e4 pr56	SOE	37	3	SOE_37	r19c15	1021.82	0.224365	372.141	0.997793	649.68	1.0185	1.70081	0.958375	C1C1	c1e4
19	10	C1C1 rho c1e4 pr56	SOE	37	3	SOE_37	r19c10	1001.63	0.214082	375.378	0.998407	626.247	0.998373	1.62286	0.923809	C1C1	c1e4
19	12	C1C1 rho c1e4 pr56	SOE	37	3	SOE_37	r19c12	1045.96	0.213936	407.847	0.998184	638.109	1.04256	1.62175	0.941306	C1C1	c1e4
19	13	C1C1 rho c1e4 pr56	SOE	37	3	SOE_37	r19c13	1053	0.214143	399.608	0.998037	653.394	1.04958	1.62332	0.963854	C1C1	c1e4
19	11	C1C1 rho c1e4 pr56	SOE	37	3	SOE_37	r19c11	1111.81	0.190901	483.017	0.998751	628.789	1.1082	1.44714	0.927558	C1C1	c1e4
18	13	C1C1 rho c1e4 pr56	SOE	37	3	SOE_37	r18c13	1071.06	0.191018	444.34	0.998073	626.718	1.06758	1.44802	0.924503	C1C1	c1e4
18	12	C1C1 rho c1e4 pr56	SOE	37	3	SOE_37	r18c12	1070.5	0.200942	430.547	0.998535	639.95	1.06702	1.52325	0.944022	C1C1	c1e4
18	14	C1C1 rho c1e4 pr56	SOE	37	3	SOE_37	r18c14	1105.78	0.194634	467.56	0.998292	638.221	1.10219	1.47543	0.941471	C1C1	c1e4
18	15	C1C1 rho c1e4 pr56	SOE	37	3	SOE_37	r18c15	1105.81	0.202898	449.476	0.998197	656.333	1.10222	1.53808	0.96819	C1C1	c1e4
18	11	C1C1 rho c1e4 pr56	SOE	37	3	SOE_37	r18c11	1058.2	0.206492	418.741	0.998029	639.458	1.05476	1.56532	0.943296	C1C1	c1e4
18	10	C1C1 rho c1e4 pr56	SOE	37	3	SOE_37	r18c10	1066.62	0.208587	421.263	0.998561	645.354	1.06315	1.58121	0.951994	C1C1	c1e4
19	3	C1C1 rho e1e4 pr55	YPD	30	6	YPD_30	r19c3	2511.28	0.0901331	656.739	0.992156	1854.54	1.72242	0.500164	1.76713	C1C1	e1e4
19	6	C1C1 rho e1e4 pr55	YPD	30	6	YPD_30	r19c6	2292.47	0.0939568	681.502	0.990554	1610.97	1.57234	0.521383	1.53505	C1C1	e1e4
19	5	C1C1 rho e1e4 pr55	YPD	30	6	YPD_30	r19c5	2282.01	0.0939379	652.071	0.990608	1629.94	1.56517	0.521278	1.55312	C1C1	e1e4
19	4	C1C1 rho e1e4 pr55	YPD	30	6	YPD_30	r19c4	2355.2	0.0933978	655.536	0.991428	1699.66	1.61537	0.518281	1.61956	C1C1	e1e4
19	7	C1C1 rho e1e4 pr55	YPD	30	6	YPD_30	r19c7	2191.52	0.0957562	655.479	0.99094	1536.04	1.5031	0.531368	1.46365	C1C1	e1e4
18	3	C1C1 rho e1e4 pr55	YPD	30	6	YPD_30	r18c3	2520.57	0.0899996	657.836	0.992399	1862.74	1.72879	0.499424	1.77494	C1C1	e1e4
18	4	C1C1 rho e1e4 pr55	YPD	30	6	YPD_30	r18c4	2364.42	0.0931587	655.745	0.991415	1708.67	1.62169	0.516954	1.62814	C1C1	e1e4
18	6	C1C1 rho e1e4 pr55	YPD	30	6	YPD_30	r18c6	2267.23	0.096076	659.973	0.990728	1607.26	1.55503	0.533143	1.53151	C1C1	e1e4
18	5	C1C1 rho e1e4 pr55	YPD	30	6	YPD_30	r18c5	2276.35	0.0953681	647.171	0.990295	1629.18	1.56129	0.529215	1.55239	C1C1	e1e4
18	7	C1C1 rho e1e4 pr55	YPD	30	6	YPD_30	r18c7	2239.63	0.0956293	664.319	0.990163	1575.31	1.5361	0.530664	1.50107	C1C1	e1e4
3	13	C1C1 rho e1e4 pr2	SOE	37	5	SOE_37	r3c13	1071.51	0.201335	316.437	0.996263	755.078	1.03294	1.57295	1.09743	C1C1	e1e4
3	11	C1C1 rho e1e4 pr2	SOE	37	5	SOE_37	r3c11	1089.33	0.192707	312.728	0.994811	776.597	1.0501	1.50554	1.12871	C1C1	e1e4
3	12	C1C1 rho e1e4 pr2	SOE	37	5	SOE_37	r3c12	1086.29	0.177382	359.679	0.997216	726.612	1.04718	1.38582	1.05606	C1C1	e1e4
3	15	C1C1 rho e1e4 pr2	SOE	37	5	SOE_37	r3c15	1017.41	0.207734	281.552	0.996221	735.855	0.980776	1.62294	1.06949	C1C1	e1e4
3	14	C1C1 rho e1e4 pr2	SOE	37	5	SOE_37	r3c14	1104.94	0.175619	374.063	0.998612	730.874	1.06515	1.37204	1.06225	C1C1	e1e4
3	10	C1C1 rho e1e4 pr2	SOE	37	5	SOE_37	r3c10	1142.55	0.151227	401.205	0.996944	741.342	1.10141	1.18147	1.07747	C1C1	e1e4
3	42	C1C1 rho c1e4 pr 12	SOE	37	3	SOE_37	r3c42	1108.27	0.178451	446.746	0.998866	661.521	1.10467	1.35276	0.975843	C1C1	c1e4
3	44	C1C1 rho c1e4 pr 12	SOE	37	3	SOE_37	r3c44	1109.88	0.168179	424.335	0.997824	685.547	1.10628	1.27489	1.01128	C1C1	c1e4
3	45	C1C1 rho c1e4 pr 12	SOE	37	3	SOE_37	r3c45	1109.06	0.15468	407.472	0.997883	701.587	1.10546	1.17256	1.03495	C1C1	c1e4
3	43	C1C1 rho c1e4 pr 12	SOE	37	3	SOE_37	r3c43	1089.82	0.173872	429.745	0.99861	660.07	1.08628	1.31804	0.973702	C1C1	c1e4
22	30	C1C1 rho e1e4 pr70	YPD	37	6	YPD_37	r22c30	2310	0.0989267	796.546	0.989347	1513.46	1.44184	0.570562	1.23577	C1C1	e1e4
22	31	C1C1 rho e1e4 pr70	YPD	37	6	YPD_37	r22c31	2315.14	0.0993742	790.293	0.988187	1524.85	1.44504	0.573143	1.24507	C1C1	e1e4
22	27	C1C1 rho e1e4 pr70	YPD	37	6	YPD_37	r22c27	2289.98	0.100518	786.77	0.989041	1503.21	1.42934	0.579741	1.22741	C1C1	e1e4
22	29	C1C1 rho e1e4 pr70	YPD	37	6	YPD_37	r22c29	2339.34	0.0992396	816.279	0.989437	1523.06	1.46015	0.572366	1.24361	C1C1	e1e4
22	28	C1C1 rho e1e4 pr70	YPD	37	6	YPD_37	r22c28	2274.04	0.0997866	784.238	0.988777	1489.8	1.41939	0.575521	1.21645	C1C1	e1e4
22	26	C1C1 rho e1e4 pr70	YPD	37	6	YPD_37	r22c26	2351.4	0.100737	830.349	0.988912	1521.05	1.46767	0.581001	1.24197	C1C1	e1e4
23	28	C1C1 rho e1e4 pr70	YPD	37	6	YPD_37	r23c28	2376.92	0.0993011	832.757	0.988494	1544.16	1.4836	0.572721	1.26084	C1C1	e1e4
23	29	C1C1 rho e1e4 pr70	YPD	37	6	YPD_37	r23c29	2360.61	0.0995696	816.922	0.988696	1543.69	1.47342	0.57427	1.26045	C1C1	e1e4
23	26	C1C1 rho e1e4 pr70	YPD	37	6	YPD_37	r23c26	2277.81	0.100406	783.099	0.988367	1494.71	1.42174	0.579092	1.22046	C1C1	e1e4
23	27	C1C1 rho e1e4 pr70	YPD	37	6	YPD_37	r23c27	2367.28	0.100913	828.174	0.988538	1539.1	1.47759	0.582015	1.25671	C1C1	e1e4
23	30	C1C1 rho e1e4 pr70	YPD	37	6	YPD_37	r23c30	2378.9	0.0989024	825.791	0.989346	1553.11	1.48484	0.570422	1.26814	C1C1	e1e4
23	31	C1C1 rho e1e4 pr70	YPD	37	6	YPD_37	r23c31	2276.52	0.0988886	776.074	0.988691	1500.44	1.42093	0.570342	1.22514	C1C1	e1e4
26	4	C1C1 rho c1s1 d112	YPD	30	4	YPD_30	r26c4	2265.58	0.106924	658.15	0.994688	1607.43	1.67229	0.493392	1.60235	C1C1	c1s1
26	3	C1C1 rho c1s1 d112	YPD	30	4	YPD_30	r26c3	2448.71	0.102553	674.37	0.994722	1774.34	1.80746	0.473223	1.76873	C1C1	c1s1
26	6	C1C1 rho c1s1 d112	YPD	30	4	YPD_30	r26c6	2201.65	0.111996	676.549	0.993403	1525.11	1.6251	0.516796	1.52028	C1C1	c1s1
26	5	C1C1 rho c1s1 d112	YPD	30	4	YPD_30	r26c5	2276.71	0.108461	699.873	0.994096	1576.84	1.68051	0.500483	1.57186	C1C1	c1s1
26	7	C1C1 rho c1s1 d112	YPD	30	4	YPD_30	r26c7	2190.8	0.113343	679.434	0.993796	1511.37	1.61709	0.52301	1.50659	C1C1	c1s1
27	3	C1C1 rho c1s1 d112	YPD	30	4	YPD_30	r27c3	2445.99	0.102416	676.339	0.99527	1769.66	1.80546	0.472591	1.76406	C1C1	c1s1
27	5	C1C1 rho c1s1 d112	YPD	30	4	YPD_30	r27c5	2236.81	0.107873	676.827	0.99333	1559.98	1.65105	0.497773	1.55505	C1C1	c1s1
27	4	C1C1 rho c1s1 d112	YPD	30	4	YPD_30	r27c4	2290.5	0.105391	675.792	0.993769	1614.7	1.69068	0.486317	1.6096	C1C1	c1s1
27	7	C1C1 rho c1s1 d112	YPD	30	4	YPD_30	r27c7	2183.17	0.111969	669.669	0.993587	1513.5	1.61146	0.51667	1.50871	C1C1	c1s1
27	6	C1C1 rho c1s1 d112	YPD	30	4	YPD_30	r27c6	2218.05	0.111107	675.817	0.99407	1542.23	1.6372	0.512694	1.53735	C1C1	c1s1
6	45	C1C1 rho c1e1 pr24	SOE	37	2	SOE_37	r6c45	1145.45	0.20675	356.572	0.995458	788.881	1.11504	1.47484	1.11883	C1C1	c1e1
6	43	C1C1 rho c1e1 pr24	SOE	37	2	SOE_37	r6c43	1061.25	0.229741	326.931	0.997287	734.315	1.03307	1.63885	1.04144	C1C1	c1e1
6	44	C1C1 rho c1e1 pr24	SOE	37	2	SOE_37	r6c44	1166.94	0.221741	390.14	0.996938	776.801	1.13596	1.58178	1.10169	C1C1	c1e1
6	46	C1C1 rho c1e1 pr24	SOE	37	2	SOE_37	r6c46	1314.55	0.166034	463.735	0.997607	850.817	1.27965	1.1844	1.20667	C1C1	c1e1
6	42	C1C1 rho c1e1 pr24	SOE	37	2	SOE_37	r6c42	1135.78	0.231777	359.845	0.997744	775.934	1.10563	1.65338	1.10047	C1C1	c1e1
7	46	C1C1 rho c1e1 pr24	SOE	37	2	SOE_37	r7c46	1329.86	0.163318	502.487	0.997858	827.373	1.29455	1.16502	1.17342	C1C1	c1e1
7	42	C1C1 rho c1e1 pr24	SOE	37	2	SOE_37	r7c42	1186.48	0.23283	406.358	0.997687	780.126	1.15498	1.66089	1.10641	C1C1	c1e1
7	43	C1C1 rho c1e1 pr24	SOE	37	2	SOE_37	r7c43	1109.19	0.226106	361.485	0.997287	747.701	1.07974	1.61292	1.06042	C1C1	c1e1
7	45	C1C1 rho c1e1 pr24	SOE	37	2	SOE_37	r7c45	1205.05	0.20477	405.488	0.996514	799.561	1.17306	1.46072	1.13398	C1C1	c1e1
7	44	C1C1 rho c1e1 pr24	SOE	37	2	SOE_37	r7c44	1160.21	0.223717	379.504	0.996584	780.702	1.1294	1.59588	1.10723	C1C1	c1e1
30	10	C1C1 rho C1 control 1	YPEG	30	3	YPEG_30	r30c10	3031.58	0.0619734	523.779	0.999748	2507.8	2.01229	0.978479	1.93131	C1C1	c1
30	12	C1C1 rho C1 control 1	YPEG	30	3	YPEG_30	r30c12	2920.75	0.065431	461.401	0.999206	2459.35	1.93873	1.03307	1.894	C1C1	c1
30	11	C1C1 rho C1 control 1	YPEG	30	3	YPEG_30	r30c11	2969.16	0.0633696	494.088	0.999637	2475.07	1.97086	1.00052	1.9061	C1C1	c1
30	15	C1C1 rho C1 control 1	YPEG	30	3	YPEG_30	r30c15	2907.7	0.0666758	434.854	0.998832	2472.84	1.93006	1.05272	1.90439	C1C1	c1
30	14	C1C1 rho C1 control 1	YPEG	30	3	YPEG_30	r30c14	2949.44	0.0658021	466.085	0.999162	2483.36	1.95777	1.03893	1.91248	C1C1	c1
30	13	C1C1 rho C1 control 1	YPEG	30	3	YPEG_30	r30c13	2936.27	0.0657979	464.117	0.99905	2472.15	1.94903	1.03886	1.90386	C1C1	c1
14	3	C1C1 rho c1e1 pr43	YPEG	37	2	YPEG_37	r14c3	2963.22	0.0468435	435.678	0.997297	2527.54	2.50583	0.688134	2.48925	C1C1	c1e1
14	4	C1C1 rho c1e1 pr43	YPEG	37	2	YPEG_37	r14c4	2940.18	0.0469384	455.114	0.997112	2485.06	2.48635	0.689529	2.44742	C1C1	c1e1
14	6	C1C1 rho c1e1 pr43	YPEG	37	2	YPEG_37	r14c6	2831.47	0.0477952	427.599	0.997047	2403.87	2.39442	0.702115	2.36746	C1C1	c1e1
14	5	C1C1 rho c1e1 pr43	YPEG	37	2	YPEG_37	r14c5	2791.79	0.0483206	417.828	0.997207	2373.97	2.36087	0.709833	2.33801	C1C1	c1e1
14	7	C1C1 rho c1e1 pr43	YPEG	37	2	YPEG_37	r14c7	2925.27	0.0480945	435.271	0.997173	2490	2.47374	0.706511	2.45229	C1C1	c1e1
15	3	C1C1 rho c1e1 pr43	YPEG	37	2	YPEG_37	r15c3	3146.79	0.0458152	488.025	0.997164	2658.76	2.66107	0.673028	2.61849	C1C1	c1e1
15	4	C1C1 rho c1e1 pr43	YPEG	37	2	YPEG_37	r15c4	2955.57	0.0466653	453.497	0.996905	2502.07	2.49937	0.685517	2.46418	C1C1	c1e1
15	5	C1C1 rho c1e1 pr43	YPEG	37	2	YPEG_37	r15c5	2973.66	0.0468119	474.386	0.996986	2499.28	2.51467	0.68767	2.46142	C1C1	c1e1
15	7	C1C1 rho c1e1 pr43	YPEG	37	2	YPEG_37	r15c7	2927.42	0.0477845	442.43	0.997251	2484.99	2.47556	0.701957	2.44736	C1C1	c1e1
15	6	C1C1 rho c1e1 pr43	YPEG	37	2	YPEG_37	r15c6	2953.93	0.0472803	464.995	0.996913	2488.94	2.49798	0.694551	2.45124	C1C1	c1e1
11	39	C1C1 rho c1s1 d122	SOE	37	4	SOE_37	r11c39	987.399	0.206998	382.348	0.998699	605.051	1.01637	1.57124	0.952481	C1C1	c1s1
11	38	C1C1 rho c1s1 d122	SOE	37	4	SOE_37	r11c38	1034.33	0.191675	432.414	0.998998	601.92	1.06469	1.45494	0.947552	C1C1	c1s1
11	34	C1C1 rho c1s1 d122	SOE	37	4	SOE_37	r11c34	1063.68	0.202343	421.876	0.99909	641.803	1.09489	1.53591	1.01034	C1C1	c1s1
11	35	C1C1 rho c1s1 d122	SOE	37	4	SOE_37	r11c35	1023.2	0.199978	395.322	0.998502	627.878	1.05323	1.51795	0.988416	C1C1	c1s1
11	37	C1C1 rho c1s1 d122	SOE	37	4	SOE_37	r11c37	1029.17	0.210379	398.35	0.998736	630.821	1.05937	1.59691	0.993049	C1C1	c1s1
10	36	C1C1 rho c1s1 d122	SOE	37	4	SOE_37	r10c36	1045.5	0.205856	400.286	0.999193	645.215	1.07618	1.56258	1.01571	C1C1	c1s1
10	39	C1C1 rho c1s1 d122	SOE	37	4	SOE_37	r10c39	1064.14	0.186622	455.152	0.998662	608.991	1.09537	1.41658	0.958684	C1C1	c1s1
10	38	C1C1 rho c1s1 d122	SOE	37	4	SOE_37	r10c38	1053.19	0.192471	438.589	0.999231	614.598	1.08409	1.46098	0.96751	C1C1	c1s1
10	34	C1C1 rho c1s1 d122	SOE	37	4	SOE_37	r10c34	1079.87	0.190143	437.962	0.998685	641.904	1.11156	1.4433	1.0105	C1C1	c1s1
10	35	C1C1 rho c1s1 d122	SOE	37	4	SOE_37	r10c35	1067.87	0.198217	422.456	0.99895	645.417	1.09921	1.50459	1.01603	C1C1	c1s1
23	46	C1C1 rho c1e1 pr66	SOE	30	1	SOE_30	r23c46	1168.99	0.125801	511.451	0.999379	657.541	1.10152	0.920786	0.917904	C1C1	c1e1
23	42	C1C1 rho c1e1 pr66	SOE	30	1	SOE_30	r23c42	1046.72	0.152612	495.382	0.999691	551.341	0.986309	1.11703	0.769653	C1C1	c1e1
23	43	C1C1 rho c1e1 pr66	SOE	30	1	SOE_30	r23c43	1014.74	0.152622	473.428	0.999609	541.314	0.956173	1.1171	0.755656	C1C1	c1e1
23	44	C1C1 rho c1e1 pr66	SOE	30	1	SOE_30	r23c44	1077.94	0.145136	505.536	0.999632	572.4	1.01572	1.06231	0.799051	C1C1	c1e1
23	45	C1C1 rho c1e1 pr66	SOE	30	1	SOE_30	r23c45	1081.22	0.138809	487.376	0.999442	593.849	1.01882	1.016	0.828992	C1C1	c1e1
22	44	C1C1 rho c1e1 pr66	SOE	30	1	SOE_30	r22c44	1099.41	0.145351	522.143	0.999413	577.262	1.03595	1.06388	0.805837	C1C1	c1e1
22	45	C1C1 rho c1e1 pr66	SOE	30	1	SOE_30	r22c45	1116.33	0.138981	505.922	0.999702	610.41	1.0519	1.01726	0.852111	C1C1	c1e1
22	46	C1C1 rho c1e1 pr66	SOE	30	1	SOE_30	r22c46	1191.65	0.129242	512.27	0.999609	679.384	1.12287	0.945977	0.948396	C1C1	c1e1
22	42	C1C1 rho c1e1 pr66	SOE	30	1	SOE_30	r22c42	1068.44	0.152537	512.599	0.999535	555.841	1.00677	1.11648	0.775934	C1C1	c1e1
22	43	C1C1 rho c1e1 pr66	SOE	30	1	SOE_30	r22c43	1054.12	0.152188	503.081	0.999501	551.036	0.993276	1.11393	0.769227	C1C1	c1e1
15	6	C1C1 rho c1e4 pr25	YPEG	30	3	YPEG_30	r15c6	2783.17	0.0632158	475.954	0.999223	2307.22	1.84741	0.998094	1.77684	C1C1	c1e4
15	5	C1C1 rho c1e4 pr25	YPEG	30	3	YPEG_30	r15c5	2805.94	0.0623269	459.338	0.999062	2346.6	1.86252	0.98406	1.80717	C1C1	c1e4
15	4	C1C1 rho c1e4 pr25	YPEG	30	3	YPEG_30	r15c4	2882.74	0.0617214	464.603	0.998998	2418.14	1.9135	0.974501	1.86226	C1C1	c1e4
15	3	C1C1 rho c1e4 pr25	YPEG	30	3	YPEG_30	r15c3	3073.32	0.0587304	476.32	0.99935	2597	2.04	0.927276	2	C1C1	c1e4
15	7	C1C1 rho c1e4 pr25	YPEG	30	3	YPEG_30	r15c7	2691.61	0.0652514	458.153	0.998818	2233.46	1.78663	1.03023	1.72003	C1C1	c1e4
14	7	C1C1 rho c1e4 pr25	YPEG	30	3	YPEG_30	r14c7	2675.98	0.0657533	445.216	0.998676	2230.77	1.77626	1.03816	1.71796	C1C1	c1e4
14	6	C1C1 rho c1e4 pr25	YPEG	30	3	YPEG_30	r14c6	2754.5	0.0632048	466.226	0.999127	2288.27	1.82837	0.997921	1.76225	C1C1	c1e4
14	5	C1C1 rho c1e4 pr25	YPEG	30	3	YPEG_30	r14c5	2821.01	0.0624458	461.503	0.999015	2359.51	1.87252	0.985937	1.81711	C1C1	c1e4
14	4	C1C1 rho c1e4 pr25	YPEG	30	3	YPEG_30	r14c4	2890.58	0.0617582	458.265	0.999234	2432.32	1.9187	0.975081	1.87318	C1C1	c1e4
14	3	C1C1 rho c1e4 pr25	YPEG	30	3	YPEG_30	r14c3	3016.63	0.0598723	460.58	0.99934	2556.05	2.00237	0.945306	1.96847	C1C1	c1e4
26	27	C1C1 rho c1e1 pr76	YPD	30	1	YPD_30	r26c27	2504.17	0.116984	713.982	0.994179	1790.19	1.86866	0.564394	1.83991	C1C1	c1e1
26	26	C1C1 rho c1e1 pr76	YPD	30	1	YPD_30	r26c26	2484.56	0.117482	710.861	0.994215	1773.7	1.85403	0.566799	1.82297	C1C1	c1e1
27	27	C1C1 rho c1e1 pr76	YPD	30	1	YPD_30	r27c27	2495.17	0.116951	696.031	0.994171	1799.14	1.86194	0.564236	1.84911	C1C1	c1e1
27	26	C1C1 rho c1e1 pr76	YPD	30	1	YPD_30	r27c26	2504.88	0.11697	711.309	0.994212	1793.58	1.86919	0.564326	1.8434	C1C1	c1e1
27	29	C1C1 rho c1e1 pr76	YPD	30	1	YPD_30	r27c29	2504.42	0.117953	702.373	0.99406	1802.05	1.86885	0.569069	1.8521	C1C1	c1e1
27	28	C1C1 rho c1e1 pr76	YPD	30	1	YPD_30	r27c28	2558.86	0.116434	731.092	0.99412	1827.77	1.90947	0.561741	1.87854	C1C1	c1e1
27	31	C1C1 rho c1e1 pr76	YPD	30	1	YPD_30	r27c31	2568.66	0.117566	715.046	0.993864	1853.62	1.91678	0.567202	1.9051	C1C1	c1e1
27	30	C1C1 rho c1e1 pr76	YPD	30	1	YPD_30	r27c30	2480.45	0.118565	682.131	0.993953	1798.32	1.85096	0.572021	1.84827	C1C1	c1e1
26	29	C1C1 rho c1e1 pr76	YPD	30	1	YPD_30	r26c29	2503.5	0.119091	697.159	0.99368	1806.34	1.86816	0.574558	1.85652	C1C1	c1e1
26	28	C1C1 rho c1e1 pr76	YPD	30	1	YPD_30	r26c28	2525.19	0.115388	724.923	0.994004	1800.26	1.88434	0.556696	1.85027	C1C1	c1e1
26	31	C1C1 rho c1e1 pr76	YPD	30	1	YPD_30	r26c31	2505.48	0.119504	676.824	0.993343	1828.66	1.86964	0.576554	1.87945	C1C1	c1e1
26	30	C1C1 rho c1e1 pr76	YPD	30	1	YPD_30	r26c30	2540.3	0.116411	713.18	0.994009	1827.12	1.89562	0.561629	1.87787	C1C1	c1e1
22	6	C1C1 rho c1s1 d100	YPEG	30	4	YPEG_30	r22c6	2894.29	0.0639308	511.408	0.999762	2382.88	2.01017	0.986235	1.87988	C1C1	c1s1
22	5	C1C1 rho c1s1 d100	YPEG	30	4	YPEG_30	r22c5	2970.45	0.0621344	520.777	0.999763	2449.67	2.06306	0.958522	1.93257	C1C1	c1s1
22	4	C1C1 rho c1s1 d100	YPEG	30	4	YPEG_30	r22c4	3018.39	0.0621549	479.222	0.998732	2539.16	2.09636	0.958839	2.00317	C1C1	c1s1
23	3	C1C1 rho c1s1 d100	YPEG	30	4	YPEG_30	r23c3	3090.73	0.0612731	453.064	0.998808	2637.67	2.1466	0.945236	2.08088	C1C1	c1s1
23	7	C1C1 rho c1s1 d100	YPEG	30	4	YPEG_30	r23c7	2835.43	0.0653833	489.846	0.999383	2345.59	1.96929	1.00864	1.85045	C1C1	c1s1
23	6	C1C1 rho c1s1 d100	YPEG	30	4	YPEG_30	r23c6	2896.16	0.0629823	511.084	0.999711	2385.08	2.01147	0.971604	1.88161	C1C1	c1s1
23	5	C1C1 rho c1s1 d100	YPEG	30	4	YPEG_30	r23c5	2891.21	0.0635728	457.116	0.998595	2434.09	2.00803	0.980712	1.92028	C1C1	c1s1
23	4	C1C1 rho c1s1 d100	YPEG	30	4	YPEG_30	r23c4	3035.32	0.0611683	491.325	0.999013	2543.99	2.10812	0.943619	2.00698	C1C1	c1s1
22	7	C1C1 rho c1s1 d100	YPEG	30	4	YPEG_30	r22c7	2841.89	0.0659486	503.143	0.999459	2338.75	1.97377	1.01736	1.84506	C1C1	c1s1
22	3	C1C1 rho c1s1 d100	YPEG	30	4	YPEG_30	r22c3	3126.47	0.0605023	482.342	0.999331	2644.13	2.17142	0.933344	2.08598	C1C1	c1s1
15	45	C1C1 rho c1e4 pr48	SOE	30	3	SOE_30	r15c45	1192.39	0.188831	405.468	0.996291	786.92	1.08071	1.27733	1.00334	C1C1	c1e4
15	46	C1C1 rho c1e4 pr48	SOE	30	3	SOE_30	r15c46	1339.62	0.144834	510.401	0.998494	829.22	1.21415	0.979711	1.05727	C1C1	c1e4
15	43	C1C1 rho c1e4 pr48	SOE	30	3	SOE_30	r15c43	1160.44	0.188404	428.355	0.998338	732.081	1.05175	1.27444	0.933419	C1C1	c1e4
15	44	C1C1 rho c1e4 pr48	SOE	30	3	SOE_30	r15c44	1212.81	0.19362	436.835	0.997653	775.976	1.09922	1.30972	0.989385	C1C1	c1e4
15	42	C1C1 rho c1e4 pr48	SOE	30	3	SOE_30	r15c42	1180.76	0.192416	438.539	0.99856	742.223	1.07017	1.30158	0.94635	C1C1	c1e4
14	42	C1C1 rho c1e4 pr48	SOE	30	3	SOE_30	r14c42	1136.46	0.213011	384.855	0.997526	751.607	1.03002	1.44089	0.958315	C1C1	c1e4
14	43	C1C1 rho c1e4 pr48	SOE	30	3	SOE_30	r14c43	1144.09	0.203469	396.061	0.997748	748.033	1.03694	1.37634	0.953759	C1C1	c1e4
14	44	C1C1 rho c1e4 pr48	SOE	30	3	SOE_30	r14c44	1261.38	0.183898	481.301	0.997837	780.08	1.14324	1.24396	0.994619	C1C1	c1e4
14	45	C1C1 rho c1e4 pr48	SOE	30	3	SOE_30	r14c45	1208.24	0.181761	428.959	0.996826	779.277	1.09507	1.2295	0.993595	C1C1	c1e4
14	46	C1C1 rho c1e4 pr48	SOE	30	3	SOE_30	r14c46	1276.06	0.163025	427.506	0.995621	848.558	1.15655	1.10277	1.08193	C1C1	c1e4
10	26	C1C1 rho c1e4 pr34	YPD	37	3	YPD_37	r10c26	2230.38	0.101258	784.052	0.986119	1446.32	1.393	0.607172	1.21333	C1C1	c1e4
10	27	C1C1 rho c1e4 pr34	YPD	37	3	YPD_37	r10c27	2251.71	0.100457	791.773	0.987552	1459.93	1.40632	0.602367	1.22475	C1C1	c1e4
10	30	C1C1 rho c1e4 pr34	YPD	37	3	YPD_37	r10c30	2264.96	0.101734	788.781	0.986454	1476.18	1.4146	0.610023	1.23838	C1C1	c1e4
10	31	C1C1 rho c1e4 pr34	YPD	37	3	YPD_37	r10c31	2306.4	0.0997216	829.819	0.987116	1476.58	1.44048	0.597958	1.23872	C1C1	c1e4
10	29	C1C1 rho c1e4 pr34	YPD	37	3	YPD_37	r10c29	2195.96	0.0998226	760.155	0.987864	1435.8	1.3715	0.598563	1.20451	C1C1	c1e4
10	28	C1C1 rho c1e4 pr34	YPD	37	3	YPD_37	r10c28	2257.65	0.100581	799.569	0.986624	1458.08	1.41003	0.603112	1.2232	C1C1	c1e4
11	27	C1C1 rho c1e4 pr34	YPD	37	3	YPD_37	r11c27	2248.81	0.100931	798.558	0.986764	1450.25	1.40451	0.605208	1.21663	C1C1	c1e4
11	28	C1C1 rho c1e4 pr34	YPD	37	3	YPD_37	r11c28	2296.04	0.101214	826.789	0.986597	1469.25	1.43401	0.606906	1.23257	C1C1	c1e4
11	26	C1C1 rho c1e4 pr34	YPD	37	3	YPD_37	r11c26	2239.07	0.10022	793.622	0.986963	1445.44	1.39842	0.600947	1.2126	C1C1	c1e4
11	31	C1C1 rho c1e4 pr34	YPD	37	3	YPD_37	r11c31	2260.38	0.101499	798.654	0.98656	1461.73	1.41174	0.608616	1.22626	C1C1	c1e4
11	29	C1C1 rho c1e4 pr34	YPD	37	3	YPD_37	r11c29	2257.22	0.1015	798.153	0.987327	1459.07	1.40976	0.60862	1.22402	C1C1	c1e4
11	30	C1C1 rho c1e4 pr34	YPD	37	3	YPD_37	r11c30	2247.27	0.101719	793.231	0.986993	1454.04	1.40355	0.609936	1.2198	C1C1	c1e4
26	22	C1C1 rho e1e4 pr75	YPD	37	5	YPD_37	r26c22	2309.35	0.0985312	798.861	0.989004	1510.49	1.41244	0.557861	1.24203	C1C1	e1e4
26	23	C1C1 rho e1e4 pr75	YPD	37	5	YPD_37	r26c23	2351.39	0.0980339	821.754	0.988616	1529.64	1.43816	0.555045	1.25778	C1C1	e1e4
26	20	C1C1 rho e1e4 pr75	YPD	37	5	YPD_37	r26c20	2356.1	0.0967609	816.077	0.988647	1540.02	1.44104	0.547837	1.26632	C1C1	e1e4
26	19	C1C1 rho e1e4 pr75	YPD	37	5	YPD_37	r26c19	2307.02	0.0972488	791.103	0.988127	1515.92	1.41102	0.5506	1.2465	C1C1	e1e4
26	21	C1C1 rho e1e4 pr75	YPD	37	5	YPD_37	r26c21	2331.5	0.0980514	806.761	0.988799	1524.74	1.42599	0.555144	1.25375	C1C1	e1e4
26	18	C1C1 rho e1e4 pr75	YPD	37	5	YPD_37	r26c18	2319.64	0.0969612	808.206	0.988318	1511.44	1.41874	0.548972	1.24281	C1C1	e1e4
27	23	C1C1 rho e1e4 pr75	YPD	37	5	YPD_37	r27c23	2301.86	0.0961151	789.975	0.988897	1511.89	1.40786	0.544181	1.24318	C1C1	e1e4
27	22	C1C1 rho e1e4 pr75	YPD	37	5	YPD_37	r27c22	2348.39	0.0969647	806.004	0.9892	1542.39	1.43632	0.548992	1.26826	C1C1	e1e4
27	18	C1C1 rho e1e4 pr75	YPD	37	5	YPD_37	r27c18	2342.68	0.0954171	811.798	0.98803	1530.88	1.43283	0.540229	1.2588	C1C1	e1e4
27	21	C1C1 rho e1e4 pr75	YPD	37	5	YPD_37	r27c21	2360.95	0.0955846	817.07	0.989167	1543.88	1.444	0.541177	1.26949	C1C1	e1e4
27	19	C1C1 rho e1e4 pr75	YPD	37	5	YPD_37	r27c19	2325.7	0.0961685	795.211	0.988563	1530.49	1.42244	0.544483	1.25848	C1C1	e1e4
27	20	C1C1 rho e1e4 pr75	YPD	37	5	YPD_37	r27c20	2350.88	0.0956776	808.049	0.989015	1542.83	1.43784	0.541704	1.26863	C1C1	e1e4
19	18	C1C1 rho c1s1 d92	YPEG	37	4	YPEG_37	r19c18	2207.49	0.0547012	441.61	0.994464	1765.88	1.96403	0.803688	1.82697	C1C1	c1s1
18	18	C1C1 rho c1s1 d92	YPEG	37	4	YPEG_37	r18c18	2156.94	0.0543255	426.782	0.994819	1730.16	1.91905	0.798169	1.79002	C1C1	c1s1
18	19	C1C1 rho c1s1 d92	YPEG	37	4	YPEG_37	r18c19	2180.18	0.0547997	431.228	0.995007	1748.95	1.93973	0.805136	1.80946	C1C1	c1s1
18	20	C1C1 rho c1s1 d92	YPEG	37	4	YPEG_37	r18c20	2231.51	0.0540139	455.341	0.994626	1776.17	1.9854	0.79359	1.83762	C1C1	c1s1
18	21	C1C1 rho c1s1 d92	YPEG	37	4	YPEG_37	r18c21	2160.52	0.054008	433.32	0.9952	1727.2	1.92224	0.793504	1.78696	C1C1	c1s1
18	23	C1C1 rho c1s1 d92	YPEG	37	4	YPEG_37	r18c23	2192.6	0.0549237	439.686	0.994683	1752.91	1.95078	0.806958	1.81356	C1C1	c1s1
18	22	C1C1 rho c1s1 d92	YPEG	37	4	YPEG_37	r18c22	2172.65	0.0547319	431.957	0.995201	1740.69	1.93303	0.80414	1.80092	C1C1	c1s1
19	20	C1C1 rho c1s1 d92	YPEG	37	4	YPEG_37	r19c20	2258.35	0.0542001	461.832	0.994705	1796.51	2.00927	0.796326	1.85867	C1C1	c1s1
19	19	C1C1 rho c1s1 d92	YPEG	37	4	YPEG_37	r19c19	2131.03	0.0546094	415.079	0.995012	1715.95	1.89599	0.802339	1.77531	C1C1	c1s1
19	21	C1C1 rho c1s1 d92	YPEG	37	4	YPEG_37	r19c21	2157.08	0.0545543	428.327	0.994976	1728.75	1.91918	0.801531	1.78856	C1C1	c1s1
19	22	C1C1 rho c1s1 d92	YPEG	37	4	YPEG_37	r19c22	2108.89	0.0548556	410.712	0.995117	1698.18	1.8763	0.805957	1.75693	C1C1	c1s1
19	23	C1C1 rho c1s1 d92	YPEG	37	4	YPEG_37	r19c23	2220.32	0.0544263	453.198	0.994482	1767.12	1.97544	0.79965	1.82826	C1C1	c1s1
6	28	C1C1 rho c1e1 pr22	YPD	30	2	YPD_30	r6c28	2160.9	0.118261	631.65	0.99485	1529.25	1.51062	0.594357	1.39055	C1C1	c1e1
6	27	C1C1 rho c1e1 pr22	YPD	30	2	YPD_30	r6c27	2226.61	0.117855	657.208	0.994817	1569.4	1.55655	0.592315	1.42706	C1C1	c1e1
6	26	C1C1 rho c1e1 pr22	YPD	30	2	YPD_30	r6c26	2191.57	0.119355	628.216	0.994896	1563.36	1.53206	0.599851	1.42157	C1C1	c1e1
6	30	C1C1 rho c1e1 pr22	YPD	30	2	YPD_30	r6c30	2212.5	0.117519	675.431	0.994991	1537.07	1.54669	0.590624	1.39766	C1C1	c1e1
6	29	C1C1 rho c1e1 pr22	YPD	30	2	YPD_30	r6c29	2200.6	0.117275	666.282	0.994822	1534.32	1.53837	0.589399	1.39516	C1C1	c1e1
6	31	C1C1 rho c1e1 pr22	YPD	30	2	YPD_30	r6c31	2197.91	0.115593	675.046	0.994428	1522.86	1.53649	0.580946	1.38474	C1C1	c1e1
7	30	C1C1 rho c1e1 pr22	YPD	30	2	YPD_30	r7c30	2176.83	0.118831	660.475	0.994847	1516.35	1.52175	0.597221	1.37883	C1C1	c1e1
7	29	C1C1 rho c1e1 pr22	YPD	30	2	YPD_30	r7c29	2194.14	0.117758	662.989	0.995185	1531.15	1.53386	0.591826	1.39228	C1C1	c1e1
7	31	C1C1 rho c1e1 pr22	YPD	30	2	YPD_30	r7c31	2185.85	0.118807	660.561	0.99515	1525.29	1.52806	0.597101	1.38695	C1C1	c1e1
7	28	C1C1 rho c1e1 pr22	YPD	30	2	YPD_30	r7c28	2218.93	0.118919	661.323	0.99492	1557.61	1.55119	0.59766	1.41634	C1C1	c1e1
7	27	C1C1 rho c1e1 pr22	YPD	30	2	YPD_30	r7c27	2234.31	0.119708	658.531	0.994879	1575.78	1.56194	0.601628	1.43287	C1C1	c1e1
7	26	C1C1 rho c1e1 pr22	YPD	30	2	YPD_30	r7c26	2193.12	0.119055	639.434	0.994927	1553.69	1.53314	0.598344	1.41278	C1C1	c1e1
18	45	C1C1 rho e1e4 pr60	SOE	37	6	SOE_37	r18c45	1120.55	0.146707	479.875	0.99892	640.677	1.11035	1.17488	0.938131	C1C1	e1e4
18	44	C1C1 rho e1e4 pr60	SOE	37	6	SOE_37	r18c44	1097.89	0.158938	476.157	0.998993	621.736	1.0879	1.27283	0.910398	C1C1	e1e4
18	46	C1C1 rho e1e4 pr60	SOE	37	6	SOE_37	r18c46	1187.42	0.136842	482.759	0.999009	704.658	1.1766	1.09588	1.03182	C1C1	e1e4
18	43	C1C1 rho e1e4 pr60	SOE	37	6	SOE_37	r18c43	1134.56	0.166998	492.983	0.999377	641.575	1.12423	1.33737	0.939446	C1C1	e1e4
19	46	C1C1 rho e1e4 pr60	SOE	37	6	SOE_37	r19c46	1191.03	0.13873	483.202	0.999331	707.825	1.18018	1.111	1.03646	C1C1	e1e4
19	44	C1C1 rho e1e4 pr60	SOE	37	6	SOE_37	r19c44	1087.66	0.162066	469.643	0.999172	618.013	1.07775	1.29788	0.904945	C1C1	e1e4
19	45	C1C1 rho e1e4 pr60	SOE	37	6	SOE_37	r19c45	1104.39	0.153835	460.697	0.999052	643.693	1.09433	1.23196	0.942548	C1C1	e1e4
19	42	C1C1 rho e1e4 pr60	SOE	37	6	SOE_37	r19c42	1077.02	0.173461	457.074	0.999071	619.944	1.06721	1.38913	0.907773	C1C1	e1e4
19	43	C1C1 rho e1e4 pr60	SOE	37	6	SOE_37	r19c43	1053.12	0.17173	432.914	0.998973	620.201	1.04353	1.37527	0.90815	C1C1	e1e4
30	10	C1C1 rho C1 control 1	YPEG	30	2	YPEG_30	r30c10	2890.1	0.0667454	441.537	0.998351	2448.57	2.05712	1.07373	1.99761	C1C1	c1
30	12	C1C1 rho C1 control 1	YPEG	30	2	YPEG_30	r30c12	2766.84	0.0667467	389.157	0.999203	2377.69	1.96938	1.07375	1.93978	C1C1	c1
30	11	C1C1 rho C1 control 1	YPEG	30	2	YPEG_30	r30c11	2893.62	0.0665483	435.694	0.998677	2457.93	2.05962	1.07056	2.00525	C1C1	c1
30	15	C1C1 rho C1 control 1	YPEG	30	2	YPEG_30	r30c15	2686.71	0.0679439	336.903	0.99945	2349.81	1.91235	1.09301	1.91704	C1C1	c1
30	14	C1C1 rho C1 control 1	YPEG	30	2	YPEG_30	r30c14	2756.66	0.0673714	364.639	0.999334	2392.02	1.96213	1.0838	1.95148	C1C1	c1
30	13	C1C1 rho C1 control 1	YPEG	30	2	YPEG_30	r30c13	2836.21	0.0671522	398.513	0.999179	2437.7	2.01875	1.08028	1.98874	C1C1	c1
15	21	C1C1 rho e1e4 pr39	YPD	37	5	YPD_37	r15c21	2451.23	0.0975803	813.942	0.990971	1637.29	1.49922	0.552477	1.3463	C1C1	e1e4
15	20	C1C1 rho e1e4 pr39	YPD	37	5	YPD_37	r15c20	2447.11	0.0975237	808.437	0.991263	1638.67	1.4967	0.552156	1.34744	C1C1	e1e4
15	22	C1C1 rho e1e4 pr39	YPD	37	5	YPD_37	r15c22	2517.47	0.0979485	841.798	0.991257	1675.67	1.53973	0.554562	1.37786	C1C1	e1e4
15	18	C1C1 rho e1e4 pr39	YPD	37	5	YPD_37	r15c18	2506.55	0.0962208	841.54	0.991571	1665.01	1.53306	0.54478	1.36909	C1C1	e1e4
15	19	C1C1 rho e1e4 pr39	YPD	37	5	YPD_37	r15c19	2482.63	0.0972496	830.594	0.990611	1652.04	1.51843	0.550604	1.35843	C1C1	e1e4
15	23	C1C1 rho e1e4 pr39	YPD	37	5	YPD_37	r15c23	2475.68	0.096308	824.244	0.990866	1651.44	1.51418	0.545273	1.35793	C1C1	e1e4
14	18	C1C1 rho e1e4 pr39	YPD	37	5	YPD_37	r14c18	2455.71	0.0976386	814.762	0.990872	1640.95	1.50196	0.552807	1.34931	C1C1	e1e4
14	22	C1C1 rho e1e4 pr39	YPD	37	5	YPD_37	r14c22	2409.17	0.0978884	786.095	0.990744	1623.08	1.4735	0.554221	1.33461	C1C1	e1e4
14	23	C1C1 rho e1e4 pr39	YPD	37	5	YPD_37	r14c23	2458.04	0.097696	811.471	0.991066	1646.57	1.50339	0.553132	1.35393	C1C1	e1e4
14	20	C1C1 rho e1e4 pr39	YPD	37	5	YPD_37	r14c20	2443.18	0.0972997	798.415	0.990716	1644.76	1.4943	0.550888	1.35244	C1C1	e1e4
14	19	C1C1 rho e1e4 pr39	YPD	37	5	YPD_37	r14c19	2465.09	0.0972188	814.79	0.990769	1650.3	1.50769	0.55043	1.35699	C1C1	e1e4
14	21	C1C1 rho e1e4 pr39	YPD	37	5	YPD_37	r14c21	2483.29	0.0966753	826.03	0.990945	1657.26	1.51883	0.547353	1.36272	C1C1	e1e4
23	39	C1C1 rho c1e4 pr38	SOE	37	3	SOE_37	r23c39	1087.27	0.187737	480.555	0.998773	606.718	1.08374	1.42315	0.895	C1C1	c1e4
23	35	C1C1 rho c1e4 pr38	SOE	37	3	SOE_37	r23c35	1067.18	0.186994	459.455	0.998422	607.729	1.06372	1.41752	0.896492	C1C1	c1e4
23	34	C1C1 rho c1e4 pr38	SOE	37	3	SOE_37	r23c34	1083.29	0.184024	466.712	0.998797	616.577	1.07977	1.395	0.909544	C1C1	c1e4
23	37	C1C1 rho c1e4 pr38	SOE	37	3	SOE_37	r23c37	1058.45	0.190461	445.058	0.998811	613.391	1.05501	1.4438	0.904844	C1C1	c1e4
23	38	C1C1 rho c1e4 pr38	SOE	37	3	SOE_37	r23c38	1137.69	0.185169	511.352	0.998999	626.336	1.13399	1.40369	0.92394	C1C1	c1e4
23	36	C1C1 rho c1e4 pr38	SOE	37	3	SOE_37	r23c36	1112.74	0.184767	493.425	0.998709	619.317	1.10913	1.40064	0.913586	C1C1	c1e4
22	39	C1C1 rho c1e4 pr38	SOE	37	3	SOE_37	r22c39	1050.02	0.190396	452.151	0.998814	597.868	1.04661	1.44331	0.881945	C1C1	c1e4
22	38	C1C1 rho c1e4 pr38	SOE	37	3	SOE_37	r22c38	1071.29	0.185077	468.558	0.998622	602.73	1.06781	1.40299	0.889117	C1C1	c1e4
22	34	C1C1 rho c1e4 pr38	SOE	37	3	SOE_37	r22c34	1086.01	0.188275	465.461	0.998501	620.552	1.08249	1.42723	0.915407	C1C1	c1e4
22	35	C1C1 rho c1e4 pr38	SOE	37	3	SOE_37	r22c35	1102.45	0.184781	483.037	0.998777	619.413	1.09887	1.40074	0.913727	C1C1	c1e4
22	37	C1C1 rho c1e4 pr38	SOE	37	3	SOE_37	r22c37	1029.96	0.191962	425.381	0.999002	604.578	1.02661	1.45518	0.891842	C1C1	c1e4
22	36	C1C1 rho c1e4 pr38	SOE	37	3	SOE_37	r22c36	1047.71	0.192954	428.601	0.998646	619.11	1.04431	1.4627	0.91328	C1C1	c1e4
10	35	C1C1 rho e1e4 pr29	SOE	30	5	SOE_30	r10c35	1126.43	0.145462	493.417	0.999062	633.018	0.999933	1.15325	0.811322	C1C1	e1e4
10	36	C1C1 rho e1e4 pr29	SOE	30	5	SOE_30	r10c36	1067.47	0.156713	435.62	0.999524	631.848	0.947588	1.24245	0.809823	C1C1	e1e4
10	37	C1C1 rho e1e4 pr29	SOE	30	5	SOE_30	r10c37	1015.21	0.160144	402.19	0.999662	613.021	0.901199	1.26965	0.785692	C1C1	e1e4
10	34	C1C1 rho e1e4 pr29	SOE	30	5	SOE_30	r10c34	1111.99	0.150886	471.179	0.999224	640.808	0.987108	1.19625	0.821306	C1C1	e1e4
11	36	C1C1 rho e1e4 pr29	SOE	30	5	SOE_30	r11c36	1068.52	0.151824	449.991	0.999259	618.529	0.948522	1.20369	0.792752	C1C1	e1e4
11	37	C1C1 rho e1e4 pr29	SOE	30	5	SOE_30	r11c37	1017.26	0.157559	416.738	0.999563	600.524	0.903021	1.24916	0.769676	C1C1	e1e4
11	38	C1C1 rho e1e4 pr29	SOE	30	5	SOE_30	r11c38	1045.21	0.15356	447.122	0.999426	598.085	0.927827	1.21745	0.766549	C1C1	e1e4
11	39	C1C1 rho e1e4 pr29	SOE	30	5	SOE_30	r11c39	1013.69	0.157923	407.969	0.999334	605.725	0.899854	1.25204	0.776342	C1C1	e1e4
10	38	C1C1 rho e1e4 pr29	SOE	30	5	SOE_30	r10c38	1063.77	0.158149	441.274	0.999368	622.498	0.944307	1.25384	0.797839	C1C1	e1e4
10	39	C1C1 rho e1e4 pr29	SOE	30	5	SOE_30	r10c39	1067.54	0.15131	455.266	0.998907	612.278	0.947655	1.19961	0.78474	C1C1	e1e4
11	34	C1C1 rho e1e4 pr29	SOE	30	5	SOE_30	r11c34	1080.38	0.150849	452.701	0.99935	627.674	0.959046	1.19596	0.804473	C1C1	e1e4
11	35	C1C1 rho e1e4 pr29	SOE	30	5	SOE_30	r11c35	1003.67	0.169432	380.383	0.999611	623.289	0.890956	1.34329	0.798852	C1C1	e1e4
23	23	C1C1 rho c1e1 pr63	SOE	37	1	SOE_37	r23c23	827.806	0.210511	161.13	0.99877	666.676	1.05769	1.51082	1.06724	C1C1	c1e1
23	19	C1C1 rho c1e1 pr63	SOE	37	1	SOE_37	r23c19	805.311	0.210051	159.619	0.998961	645.692	1.02895	1.50752	1.03364	C1C1	c1e1
23	18	C1C1 rho c1e1 pr63	SOE	37	1	SOE_37	r23c18	863.479	0.213695	180.238	0.998653	683.241	1.10327	1.53367	1.09375	C1C1	c1e1
23	21	C1C1 rho c1e1 pr63	SOE	37	1	SOE_37	r23c21	852.34	0.208356	173.409	0.998695	678.932	1.08904	1.49535	1.08686	C1C1	c1e1
23	22	C1C1 rho c1e1 pr63	SOE	37	1	SOE_37	r23c22	858.221	0.208696	170.22	0.998264	688.002	1.09655	1.49779	1.10137	C1C1	c1e1
23	20	C1C1 rho c1e1 pr63	SOE	37	1	SOE_37	r23c20	849.016	0.207416	173.534	0.998629	675.482	1.08479	1.48861	1.08133	C1C1	c1e1
22	23	C1C1 rho c1e1 pr63	SOE	37	1	SOE_37	r22c23	843.006	0.20585	169.639	0.998848	673.367	1.07711	1.47736	1.07795	C1C1	c1e1
22	22	C1C1 rho c1e1 pr63	SOE	37	1	SOE_37	r22c22	798.852	0.210518	152.411	0.998441	646.442	1.02069	1.51086	1.03484	C1C1	c1e1
22	19	C1C1 rho c1e1 pr63	SOE	37	1	SOE_37	r22c19	805.123	0.20458	163.539	0.998529	641.584	1.02871	1.46825	1.02707	C1C1	c1e1
22	18	C1C1 rho c1e1 pr63	SOE	37	1	SOE_37	r22c18	851.861	0.213099	177.074	0.998655	674.787	1.08842	1.52939	1.08022	C1C1	c1e1
22	21	C1C1 rho c1e1 pr63	SOE	37	1	SOE_37	r22c21	819.791	0.206273	163.006	0.998618	656.785	1.04745	1.4804	1.0514	C1C1	c1e1
22	20	C1C1 rho c1e1 pr63	SOE	37	1	SOE_37	r22c20	861.961	0.211258	174.137	0.998657	687.824	1.10133	1.51618	1.10109	C1C1	c1e1
7	4	C1C1 rho e1e4 pr13	YPD	30	5	YPD_30	r7c4	2537.77	0.0791691	709.706	0.98826	1828.07	1.76756	0.422052	1.83174	C1C1	e1e4
7	3	C1C1 rho e1e4 pr13	YPD	30	5	YPD_30	r7c3	2696.18	0.0777539	718.798	0.98979	1977.38	1.87789	0.414507	1.98135	C1C1	e1e4
7	5	C1C1 rho e1e4 pr13	YPD	30	5	YPD_30	r7c5	2477	0.0804829	722.321	0.987641	1754.68	1.72523	0.429055	1.7582	C1C1	e1e4
6	5	C1C1 rho e1e4 pr13	YPD	30	5	YPD_30	r6c5	2558.11	0.074747	725.918	0.986632	1832.19	1.78172	0.398477	1.83587	C1C1	e1e4
6	4	C1C1 rho e1e4 pr13	YPD	30	5	YPD_30	r6c4	2647.93	0.0737651	728.796	0.987006	1919.13	1.84428	0.393243	1.92298	C1C1	e1e4
6	3	C1C1 rho e1e4 pr13	YPD	30	5	YPD_30	r6c3	2758.2	0.0752581	711.283	0.989251	2046.92	1.92108	0.401202	2.05102	C1C1	e1e4
6	7	C1C1 rho e1e4 pr13	YPD	30	5	YPD_30	r6c7	2486.59	0.0767681	743.373	0.98633	1743.22	1.73191	0.409252	1.74672	C1C1	e1e4
6	6	C1C1 rho e1e4 pr13	YPD	30	5	YPD_30	r6c6	2582.9	0.0739735	762.937	0.985657	1819.96	1.79899	0.394354	1.82361	C1C1	e1e4
7	7	C1C1 rho e1e4 pr13	YPD	30	5	YPD_30	r7c7	2374.42	0.0827754	705.671	0.98693	1668.75	1.65378	0.441277	1.6721	C1C1	e1e4
7	6	C1C1 rho e1e4 pr13	YPD	30	5	YPD_30	r7c6	2428.39	0.0816937	719.409	0.987153	1708.98	1.69137	0.43551	1.71241	C1C1	e1e4
22	36	C1C1 rho c1e4 pr38	YPD	30	3	YPD_30	r22c36	2355.89	0.112156	695.397	0.992748	1660.5	1.62703	0.62167	1.62387	C1C1	c1e4
22	35	C1C1 rho c1e4 pr38	YPD	30	3	YPD_30	r22c35	2428.14	0.112471	733.415	0.992956	1694.72	1.67693	0.623416	1.65735	C1C1	c1e4
22	34	C1C1 rho c1e4 pr38	YPD	30	3	YPD_30	r22c34	2387.3	0.113181	713.639	0.992489	1673.66	1.64872	0.627352	1.63675	C1C1	c1e4
22	38	C1C1 rho c1e4 pr38	YPD	30	3	YPD_30	r22c38	2394.82	0.113395	714.209	0.993143	1680.61	1.65392	0.628539	1.64354	C1C1	c1e4
22	37	C1C1 rho c1e4 pr38	YPD	30	3	YPD_30	r22c37	2417.3	0.112851	733.713	0.992897	1683.59	1.66945	0.625521	1.64646	C1C1	c1e4
22	39	C1C1 rho c1e4 pr38	YPD	30	3	YPD_30	r22c39	2400.26	0.113279	713.418	0.992892	1686.84	1.65767	0.627896	1.64964	C1C1	c1e4
23	39	C1C1 rho c1e4 pr38	YPD	30	3	YPD_30	r23c39	2405.15	0.111906	719.843	0.993212	1685.31	1.66105	0.620283	1.64814	C1C1	c1e4
23	34	C1C1 rho c1e4 pr38	YPD	30	3	YPD_30	r23c34	2424.64	0.112347	736.77	0.992822	1687.87	1.67452	0.622728	1.65065	C1C1	c1e4
23	36	C1C1 rho c1e4 pr38	YPD	30	3	YPD_30	r23c36	2395.63	0.112482	716.066	0.992807	1679.56	1.65448	0.623478	1.64252	C1C1	c1e4
23	35	C1C1 rho c1e4 pr38	YPD	30	3	YPD_30	r23c35	2384.83	0.112635	707.952	0.992801	1676.88	1.64702	0.624325	1.63989	C1C1	c1e4
23	38	C1C1 rho c1e4 pr38	YPD	30	3	YPD_30	r23c38	2401.53	0.111874	720.12	0.993296	1681.41	1.65855	0.620108	1.64432	C1C1	c1e4
23	37	C1C1 rho c1e4 pr38	YPD	30	3	YPD_30	r23c37	2385.53	0.111786	715.909	0.992447	1669.63	1.64751	0.61962	1.6328	C1C1	c1e4
23	45	C1C1 rho e1e4 pr72	SOE	37	6	SOE_37	r23c45	1080.02	0.154147	444.312	0.999027	635.709	1.07019	1.23447	0.930858	C1C1	e1e4
23	46	C1C1 rho e1e4 pr72	SOE	37	6	SOE_37	r23c46	1141.42	0.146787	438.381	0.999316	703.039	1.13103	1.17552	1.02945	C1C1	e1e4
23	42	C1C1 rho e1e4 pr72	SOE	37	6	SOE_37	r23c42	1080.46	0.159582	481.453	0.999394	599.003	1.07062	1.27799	0.87711	C1C1	e1e4
23	44	C1C1 rho e1e4 pr72	SOE	37	6	SOE_37	r23c44	1075.13	0.157683	468.946	0.998947	606.184	1.06534	1.26278	0.887624	C1C1	e1e4
23	43	C1C1 rho e1e4 pr72	SOE	37	6	SOE_37	r23c43	1005.91	0.173485	408.301	0.998908	597.605	0.996746	1.38933	0.875063	C1C1	e1e4
22	45	C1C1 rho e1e4 pr72	SOE	37	6	SOE_37	r22c45	1094.4	0.151355	464.127	0.99897	630.276	1.08444	1.2121	0.922903	C1C1	e1e4
22	44	C1C1 rho e1e4 pr72	SOE	37	6	SOE_37	r22c44	1089.54	0.157423	474.661	0.998894	614.883	1.07962	1.26069	0.900362	C1C1	e1e4
22	46	C1C1 rho e1e4 pr72	SOE	37	6	SOE_37	r22c46	1186.59	0.138164	480.545	0.999328	706.047	1.17579	1.10647	1.03385	C1C1	e1e4
22	42	C1C1 rho e1e4 pr72	SOE	37	6	SOE_37	r22c42	1049.5	0.167177	460.922	0.998986	588.576	1.03994	1.33881	0.861842	C1C1	e1e4
22	43	C1C1 rho e1e4 pr72	SOE	37	6	SOE_37	r22c43	1061.46	0.162922	465.966	0.999474	595.494	1.05179	1.30474	0.871972	C1C1	e1e4
7	6	C1C1 rho e1e4 pr13	SOE	30	5	SOE_30	r7c6	1040.81	0.134353	417.956	0.99942	622.856	0.923926	1.06518	0.798297	C1C1	e1e4
7	7	C1C1 rho e1e4 pr13	SOE	30	5	SOE_30	r7c7	1027.98	0.147382	396.294	0.999508	631.69	0.912538	1.16847	0.80962	C1C1	e1e4
7	3	C1C1 rho e1e4 pr13	SOE	30	5	SOE_30	r7c3	1138.46	0.119206	415.434	0.999459	723.026	1.01061	0.945086	0.926683	C1C1	e1e4
7	4	C1C1 rho e1e4 pr13	SOE	30	5	SOE_30	r7c4	1098.13	0.123647	437.124	0.999199	661.006	0.974806	0.980295	0.847193	C1C1	e1e4
7	5	C1C1 rho e1e4 pr13	SOE	30	5	SOE_30	r7c5	1046.92	0.137313	396.553	0.999431	650.367	0.929348	1.08864	0.833558	C1C1	e1e4
6	6	C1C1 rho e1e4 pr13	SOE	30	5	SOE_30	r6c6	1073.81	0.140458	399.848	0.999362	673.958	0.953215	1.11358	0.863794	C1C1	e1e4
6	7	C1C1 rho e1e4 pr13	SOE	30	5	SOE_30	r6c7	1040.13	0.140686	401.344	0.999534	638.786	0.92332	1.11539	0.818715	C1C1	e1e4
6	3	C1C1 rho e1e4 pr13	SOE	30	5	SOE_30	r6c3	1198.96	0.11867	432.264	0.999304	766.696	1.06431	0.940836	0.982653	C1C1	e1e4
6	4	C1C1 rho e1e4 pr13	SOE	30	5	SOE_30	r6c4	1156.36	0.122666	448.49	0.999373	707.874	1.0265	0.972517	0.907263	C1C1	e1e4
6	5	C1C1 rho e1e4 pr13	SOE	30	5	SOE_30	r6c5	1100.02	0.124634	428.888	0.999279	671.131	0.976484	0.988124	0.86017	C1C1	e1e4
23	35	C1C1 rho c1e1 pr65	SOE	30	1	SOE_30	r23c35	1036.08	0.160021	472.529	0.999712	563.546	0.976275	1.17126	0.78669	C1C1	c1e1
23	36	C1C1 rho c1e1 pr65	SOE	30	1	SOE_30	r23c36	1062.45	0.156479	507.641	0.999391	554.81	1.00113	1.14533	0.774496	C1C1	c1e1
23	37	C1C1 rho c1e1 pr65	SOE	30	1	SOE_30	r23c37	1044.74	0.159053	490.947	0.999526	553.798	0.984445	1.16417	0.773082	C1C1	c1e1
23	38	C1C1 rho c1e1 pr65	SOE	30	1	SOE_30	r23c38	1073.91	0.157545	513.311	0.999739	560.601	1.01193	1.15314	0.782579	C1C1	c1e1
23	39	C1C1 rho c1e1 pr65	SOE	30	1	SOE_30	r23c39	1046.21	0.156256	502.918	0.999322	543.296	0.985828	1.1437	0.758422	C1C1	c1e1
23	34	C1C1 rho c1e1 pr65	SOE	30	1	SOE_30	r23c34	1098.26	0.156732	514.606	0.999636	583.649	1.03487	1.14718	0.814754	C1C1	c1e1
22	35	C1C1 rho c1e1 pr65	SOE	30	1	SOE_30	r22c35	1080.62	0.157213	510.671	0.999403	569.948	1.01825	1.1507	0.795627	C1C1	c1e1
22	36	C1C1 rho c1e1 pr65	SOE	30	1	SOE_30	r22c36	1057.4	0.160013	492.57	0.999449	564.832	0.996371	1.1712	0.788485	C1C1	c1e1
22	37	C1C1 rho c1e1 pr65	SOE	30	1	SOE_30	r22c37	986.01	0.16168	447.836	0.999622	538.174	0.9291	1.1834	0.751272	C1C1	c1e1
22	38	C1C1 rho c1e1 pr65	SOE	30	1	SOE_30	r22c38	1052.78	0.161133	489.144	0.999698	563.636	0.992016	1.1794	0.786816	C1C1	c1e1
22	39	C1C1 rho c1e1 pr65	SOE	30	1	SOE_30	r22c39	1043.08	0.156345	495.538	0.999393	547.544	0.982878	1.14435	0.764353	C1C1	c1e1
22	34	C1C1 rho c1e1 pr65	SOE	30	1	SOE_30	r22c34	1073.08	0.157767	503.448	0.999463	569.634	1.01115	1.15476	0.795189	C1C1	c1e1
14	14	C1C1 rho e1e4 pr44	SOE	30	6	SOE_30	r14c14	1020.14	0.139684	463.248	0.999315	556.897	0.881446	1.31159	0.741552	C1C1	e1e4
14	15	C1C1 rho e1e4 pr44	SOE	30	6	SOE_30	r14c15	1036.3	0.144287	468.98	0.999168	567.322	0.895406	1.35481	0.755434	C1C1	e1e4
14	10	C1C1 rho e1e4 pr44	SOE	30	6	SOE_30	r14c10	1048.51	0.134465	490.21	0.999066	558.301	0.905956	1.26259	0.743423	C1C1	e1e4
14	11	C1C1 rho e1e4 pr44	SOE	30	6	SOE_30	r14c11	1048.14	0.133954	493.787	0.999024	554.35	0.905633	1.25779	0.738162	C1C1	e1e4
14	12	C1C1 rho e1e4 pr44	SOE	30	6	SOE_30	r14c12	1079.01	0.134067	510.794	0.998759	568.215	0.932308	1.25884	0.756624	C1C1	e1e4
14	13	C1C1 rho e1e4 pr44	SOE	30	6	SOE_30	r14c13	1034.68	0.137771	477.856	0.998824	556.825	0.894007	1.29363	0.741457	C1C1	e1e4
15	12	C1C1 rho e1e4 pr44	SOE	30	6	SOE_30	r15c12	1053.09	0.1358	493.987	0.998841	559.102	0.909911	1.27512	0.744489	C1C1	e1e4
15	13	C1C1 rho e1e4 pr44	SOE	30	6	SOE_30	r15c13	1004.07	0.137639	461.959	0.998683	542.109	0.867555	1.29239	0.721862	C1C1	e1e4
15	14	C1C1 rho e1e4 pr44	SOE	30	6	SOE_30	r15c14	1038.53	0.143363	474.747	0.998615	563.78	0.89733	1.34613	0.750719	C1C1	e1e4
15	15	C1C1 rho e1e4 pr44	SOE	30	6	SOE_30	r15c15	1048.77	0.134956	498.08	0.998618	550.687	0.906176	1.26719	0.733283	C1C1	e1e4
15	10	C1C1 rho e1e4 pr44	SOE	30	6	SOE_30	r15c10	1038.33	0.134982	487.076	0.998515	551.254	0.897159	1.26744	0.734038	C1C1	e1e4
15	11	C1C1 rho e1e4 pr44	SOE	30	6	SOE_30	r15c11	1056.19	0.14091	490.931	0.998936	565.257	0.912589	1.32309	0.752684	C1C1	e1e4
19	10	C1C1 rho c1s1 d90	YPEG	37	4	YPEG_37	r19c10	2004	0.0579303	425.377	0.994178	1578.62	1.78297	0.851131	1.63323	C1C1	c1s1
19	11	C1C1 rho c1s1 d90	YPEG	37	4	YPEG_37	r19c11	2089.78	0.0572056	463.941	0.994438	1625.84	1.8593	0.840485	1.68209	C1C1	c1s1
19	13	C1C1 rho c1s1 d90	YPEG	37	4	YPEG_37	r19c13	2130.36	0.056826	480.445	0.993906	1649.92	1.8954	0.834908	1.707	C1C1	c1s1
19	12	C1C1 rho c1s1 d90	YPEG	37	4	YPEG_37	r19c12	1991.55	0.0576213	424.925	0.994735	1566.62	1.7719	0.846592	1.62082	C1C1	c1s1
19	14	C1C1 rho c1s1 d90	YPEG	37	4	YPEG_37	r19c14	2097.24	0.0573969	467.083	0.994241	1630.15	1.86593	0.843295	1.68655	C1C1	c1s1
19	15	C1C1 rho c1s1 d90	YPEG	37	4	YPEG_37	r19c15	1930.15	0.0585734	399.325	0.994614	1530.83	1.71728	0.86058	1.58379	C1C1	c1s1
18	10	C1C1 rho c1s1 d90	YPEG	37	4	YPEG_37	r18c10	1999.67	0.0574986	426.888	0.994453	1572.78	1.77913	0.844789	1.6272	C1C1	c1s1
18	11	C1C1 rho c1s1 d90	YPEG	37	4	YPEG_37	r18c11	2064.27	0.0575448	452.889	0.994215	1611.38	1.8366	0.845467	1.66713	C1C1	c1s1
18	12	C1C1 rho c1s1 d90	YPEG	37	4	YPEG_37	r18c12	2072.23	0.0570948	460.774	0.994408	1611.45	1.84368	0.838857	1.6672	C1C1	c1s1
18	14	C1C1 rho c1s1 d90	YPEG	37	4	YPEG_37	r18c14	2039.3	0.0585727	446.314	0.994165	1592.98	1.81438	0.86057	1.64809	C1C1	c1s1
18	13	C1C1 rho c1s1 d90	YPEG	37	4	YPEG_37	r18c13	2112.93	0.0574505	474.155	0.993943	1638.77	1.87989	0.844083	1.69547	C1C1	c1s1
18	15	C1C1 rho c1s1 d90	YPEG	37	4	YPEG_37	r18c15	2115.4	0.0575815	477.449	0.993943	1637.95	1.88209	0.846007	1.69462	C1C1	c1s1
30	5	C1C1 rho e1e4 pr85	YPD	30	5	YPD_30	r30c5	2413.59	0.086821	722.81	0.990499	1690.78	1.68106	0.462844	1.69417	C1C1	e1e4
30	4	C1C1 rho e1e4 pr85	YPD	30	5	YPD_30	r30c4	2444.94	0.084862	714.655	0.990162	1730.29	1.7029	0.452401	1.73376	C1C1	e1e4
30	7	C1C1 rho e1e4 pr85	YPD	30	5	YPD_30	r30c7	2403.38	0.0866085	745.183	0.989656	1658.2	1.67395	0.461711	1.66153	C1C1	e1e4
30	6	C1C1 rho e1e4 pr85	YPD	30	5	YPD_30	r30c6	2386.99	0.0858533	729.402	0.990168	1657.59	1.66254	0.457685	1.66091	C1C1	e1e4
30	10	C1C1 rho C1 control 1	YPD	30	3	YPD_30	r30c10	2435.93	0.10671	724.852	0.992786	1711.08	1.68231	0.591485	1.67335	C1C1	c1
30	12	C1C1 rho C1 control 1	YPD	30	3	YPD_30	r30c12	2391.78	0.108149	703.614	0.993134	1688.16	1.65182	0.599458	1.65093	C1C1	c1
30	11	C1C1 rho C1 control 1	YPD	30	3	YPD_30	r30c11	2361.82	0.107702	687.155	0.992753	1674.67	1.63113	0.596981	1.63773	C1C1	c1
30	14	C1C1 rho C1 control 1	YPD	30	3	YPD_30	r30c14	2438.79	0.108254	726.098	0.993049	1712.69	1.68428	0.600045	1.67492	C1C1	c1
30	13	C1C1 rho C1 control 1	YPD	30	3	YPD_30	r30c13	2376.12	0.109369	700.547	0.992873	1675.57	1.641	0.606223	1.63862	C1C1	c1
30	15	C1C1 rho C1 control 1	YPD	30	3	YPD_30	r30c15	2470.08	0.108813	735.228	0.993036	1734.85	1.7059	0.603139	1.69659	C1C1	c1
7	31	C1C1 rho c1e1 pr22	YPEG	30	2	YPEG_30	r7c31	2829.89	0.0697018	455.643	0.99906	2374.25	2.01426	1.12129	1.93698	C1C1	c1e1
7	30	C1C1 rho c1e1 pr22	YPEG	30	2	YPEG_30	r7c30	2820.73	0.0697038	446.595	0.998868	2374.14	2.00774	1.12133	1.93689	C1C1	c1e1
7	29	C1C1 rho c1e1 pr22	YPEG	30	2	YPEG_30	r7c29	2785.75	0.0702348	436.406	0.998797	2349.34	1.98284	1.12987	1.91666	C1C1	c1e1
7	28	C1C1 rho c1e1 pr22	YPEG	30	2	YPEG_30	r7c28	2770.52	0.0705895	426.742	0.998871	2343.78	1.972	1.13557	1.91212	C1C1	c1e1
7	27	C1C1 rho c1e1 pr22	YPEG	30	2	YPEG_30	r7c27	2866.49	0.0692832	455.124	0.998851	2411.37	2.04031	1.11456	1.96726	C1C1	c1e1
7	26	C1C1 rho c1e1 pr22	YPEG	30	2	YPEG_30	r7c26	2812.49	0.0702646	436.747	0.998935	2375.74	2.00187	1.13035	1.93819	C1C1	c1e1
6	26	C1C1 rho c1e1 pr22	YPEG	30	2	YPEG_30	r6c26	2810.19	0.0698878	427.93	0.999003	2382.26	2.00024	1.12428	1.94352	C1C1	c1e1
6	31	C1C1 rho c1e1 pr22	YPEG	30	2	YPEG_30	r6c31	2889.67	0.0677414	469.1	0.999209	2420.57	2.05681	1.08976	1.97477	C1C1	c1e1
6	30	C1C1 rho c1e1 pr22	YPEG	30	2	YPEG_30	r6c30	2817.37	0.0696789	438.515	0.998807	2378.86	2.00535	1.12092	1.94074	C1C1	c1e1
6	29	C1C1 rho c1e1 pr22	YPEG	30	2	YPEG_30	r6c29	2885.48	0.069681	459.082	0.998804	2426.39	2.05382	1.12096	1.97952	C1C1	c1e1
6	28	C1C1 rho c1e1 pr22	YPEG	30	2	YPEG_30	r6c28	2832.68	0.0698321	436.351	0.998929	2396.33	2.01624	1.12339	1.95499	C1C1	c1e1
6	27	C1C1 rho c1e1 pr22	YPEG	30	2	YPEG_30	r6c27	2906.83	0.0686093	459.624	0.999044	2447.2	2.06902	1.10372	1.9965	C1C1	c1e1
19	13	C1C1 rho c1s1 d90	YPEG	30	4	YPEG_30	r19c13	2777.65	0.0674036	476.672	0.998982	2300.98	1.92916	1.03981	1.81527	C1C1	c1s1
19	12	C1C1 rho c1s1 d90	YPEG	30	4	YPEG_30	r19c12	2760.53	0.0670285	472.538	0.998866	2287.99	1.91727	1.03402	1.80502	C1C1	c1s1
19	11	C1C1 rho c1s1 d90	YPEG	30	4	YPEG_30	r19c11	2811.69	0.0663201	501.825	0.999179	2309.87	1.9528	1.02309	1.82227	C1C1	c1s1
19	10	C1C1 rho c1s1 d90	YPEG	30	4	YPEG_30	r19c10	2705.61	0.0687876	449.877	0.998751	2255.74	1.87913	1.06116	1.77957	C1C1	c1s1
19	15	C1C1 rho c1s1 d90	YPEG	30	4	YPEG_30	r19c15	2757.85	0.0686158	464.5	0.999028	2293.35	1.91541	1.05851	1.80924	C1C1	c1s1
19	14	C1C1 rho c1s1 d90	YPEG	30	4	YPEG_30	r19c14	2776.32	0.0683748	475.196	0.998862	2301.13	1.92824	1.05479	1.81538	C1C1	c1s1
18	11	C1C1 rho c1s1 d90	YPEG	30	4	YPEG_30	r18c11	2787.02	0.0663766	496.503	0.999579	2290.52	1.93567	1.02397	1.80701	C1C1	c1s1
18	10	C1C1 rho c1s1 d90	YPEG	30	4	YPEG_30	r18c10	2784.25	0.0670007	476.665	0.999081	2307.58	1.93374	1.03359	1.82047	C1C1	c1s1
18	15	C1C1 rho c1s1 d90	YPEG	30	4	YPEG_30	r18c15	2807.46	0.0680252	484.866	0.999321	2322.6	1.94986	1.0494	1.83232	C1C1	c1s1
18	14	C1C1 rho c1s1 d90	YPEG	30	4	YPEG_30	r18c14	2777.06	0.0678674	481.595	0.999199	2295.47	1.92875	1.04696	1.81092	C1C1	c1s1
18	13	C1C1 rho c1s1 d90	YPEG	30	4	YPEG_30	r18c13	2791.95	0.0671303	484.986	0.999041	2306.96	1.93909	1.03559	1.81999	C1C1	c1s1
18	12	C1C1 rho c1s1 d90	YPEG	30	4	YPEG_30	r18c12	2743.36	0.0683074	467.086	0.999034	2276.27	1.90534	1.05375	1.79577	C1C1	c1s1
10	7	C1C1 rho c1e1 pr31	SOE	37	2	SOE_37	r10c7	1183.84	0.206533	382.696	0.994425	801.142	1.15241	1.4733	1.13622	C1C1	c1e1
10	6	C1C1 rho c1e1 pr31	SOE	37	2	SOE_37	r10c6	1144.08	0.209332	357.827	0.995525	786.252	1.11371	1.49326	1.1151	C1C1	c1e1
10	3	C1C1 rho c1e1 pr31	SOE	37	2	SOE_37	r10c3	1207.94	0.173638	345.292	0.99408	862.647	1.17587	1.23864	1.22345	C1C1	c1e1
10	4	C1C1 rho c1e1 pr31	SOE	37	2	SOE_37	r10c4	1234.94	0.195953	381.954	0.994103	852.985	1.20215	1.39782	1.20974	C1C1	c1e1
10	5	C1C1 rho c1e1 pr31	SOE	37	2	SOE_37	r10c5	1187.65	0.205492	368.025	0.995099	819.623	1.15612	1.46587	1.16243	C1C1	c1e1
11	5	C1C1 rho c1e1 pr31	SOE	37	2	SOE_37	r11c5	1178.11	0.197048	376.666	0.995081	801.443	1.14683	1.40563	1.13664	C1C1	c1e1
11	7	C1C1 rho c1e1 pr31	SOE	37	2	SOE_37	r11c7	1170.04	0.20857	360.279	0.993694	809.761	1.13898	1.48783	1.14844	C1C1	c1e1
11	3	C1C1 rho c1e1 pr31	SOE	37	2	SOE_37	r11c3	1225.32	0.169798	362.908	0.994696	862.416	1.19279	1.21125	1.22312	C1C1	c1e1
11	4	C1C1 rho c1e1 pr31	SOE	37	2	SOE_37	r11c4	1246.41	0.194265	392.542	0.994669	853.867	1.21332	1.38578	1.21099	C1C1	c1e1
15	42	C1C1 rho e1e4 pr48	YPD	30	6	YPD_30	r15c42	2377.16	0.0882182	732.911	0.989849	1644.25	1.63043	0.489538	1.56676	C1C1	e1e4
14	42	C1C1 rho e1e4 pr48	YPD	30	6	YPD_30	r14c42	2368.81	0.0890532	733.687	0.989566	1635.13	1.6247	0.494172	1.55806	C1C1	e1e4
14	44	C1C1 rho e1e4 pr48	YPD	30	6	YPD_30	r14c44	2448.2	0.0864475	736.745	0.990609	1711.45	1.67915	0.479713	1.63079	C1C1	e1e4
14	43	C1C1 rho e1e4 pr48	YPD	30	6	YPD_30	r14c43	2393.52	0.0886072	738.412	0.989663	1655.11	1.64165	0.491697	1.5771	C1C1	e1e4
14	46	C1C1 rho e1e4 pr48	YPD	30	6	YPD_30	r14c46	2697.75	0.0847492	708.581	0.992902	1989.16	1.85031	0.470288	1.89542	C1C1	e1e4
14	45	C1C1 rho e1e4 pr48	YPD	30	6	YPD_30	r14c45	2539.27	0.0874041	735.816	0.992146	1803.45	1.74162	0.485021	1.71846	C1C1	e1e4
15	44	C1C1 rho e1e4 pr48	YPD	30	6	YPD_30	r15c44	2472.2	0.0871887	743.736	0.990036	1728.47	1.69562	0.483825	1.647	C1C1	e1e4
15	43	C1C1 rho e1e4 pr48	YPD	30	6	YPD_30	r15c43	2388.53	0.0866146	736.293	0.989643	1652.24	1.63823	0.48064	1.57437	C1C1	e1e4
15	46	C1C1 rho e1e4 pr48	YPD	30	6	YPD_30	r15c46	2714.65	0.0838995	723.24	0.992151	1991.41	1.8619	0.465573	1.89755	C1C1	e1e4
15	45	C1C1 rho e1e4 pr48	YPD	30	6	YPD_30	r15c45	2539.5	0.0868241	732.429	0.991666	1807.07	1.74177	0.481802	1.7219	C1C1	e1e4
7	43	C1C1 rho e1e4 pr18	YPEG	37	5	YPEG_37	r7c43	2942.27	0.0536005	488.236	0.997123	2454.03	2.49238	0.776598	2.41511	C1C1	e1e4
7	42	C1C1 rho e1e4 pr18	YPEG	37	5	YPEG_37	r7c42	3001.23	0.0536511	519.432	0.997764	2481.8	2.54232	0.777332	2.44243	C1C1	e1e4
7	44	C1C1 rho e1e4 pr18	YPEG	37	5	YPEG_37	r7c44	3035.43	0.0526569	513.695	0.997253	2521.74	2.57129	0.762927	2.48174	C1C1	e1e4
7	45	C1C1 rho e1e4 pr18	YPEG	37	5	YPEG_37	r7c45	3094.5	0.0526936	503.27	0.997702	2591.23	2.62133	0.763459	2.55013	C1C1	e1e4
7	46	C1C1 rho e1e4 pr18	YPEG	37	5	YPEG_37	r7c46	3114.8	0.0526283	480.11	0.998077	2634.69	2.63853	0.762513	2.5929	C1C1	e1e4
6	43	C1C1 rho e1e4 pr18	YPEG	37	5	YPEG_37	r6c43	2917.67	0.0533434	471.598	0.997338	2446.08	2.47154	0.772874	2.40728	C1C1	e1e4
6	42	C1C1 rho e1e4 pr18	YPEG	37	5	YPEG_37	r6c42	2960.11	0.0532926	487.045	0.997401	2473.06	2.50748	0.772138	2.43384	C1C1	e1e4
6	44	C1C1 rho e1e4 pr18	YPEG	37	5	YPEG_37	r6c44	3050.06	0.0524474	501.056	0.997192	2549	2.58368	0.759891	2.50857	C1C1	e1e4
6	45	C1C1 rho e1e4 pr18	YPEG	37	5	YPEG_37	r6c45	3070.65	0.0518	481.034	0.997412	2589.61	2.60112	0.750512	2.54854	C1C1	e1e4
6	46	C1C1 rho e1e4 pr18	YPEG	37	5	YPEG_37	r6c46	3199.61	0.0513842	489.603	0.997774	2710.01	2.71037	0.744487	2.66703	C1C1	e1e4
18	44	C1C1 rho e1e4 pr60	SOE	30	6	SOE_30	r18c44	1053.89	0.130943	495.883	0.999307	558.003	0.9106	1.22951	0.743026	C1C1	e1e4
19	46	C1C1 rho e1e4 pr60	SOE	30	6	SOE_30	r19c46	1141.71	0.110224	502.315	0.999125	639.397	0.986486	1.03497	0.851409	C1C1	e1e4
19	42	C1C1 rho e1e4 pr60	SOE	30	6	SOE_30	r19c42	1026.97	0.139778	488.304	0.999176	538.668	0.887345	1.31247	0.71728	C1C1	e1e4
19	43	C1C1 rho e1e4 pr60	SOE	30	6	SOE_30	r19c43	1017.24	0.140461	471.306	0.999055	545.938	0.87894	1.31888	0.72696	C1C1	e1e4
19	44	C1C1 rho e1e4 pr60	SOE	30	6	SOE_30	r19c44	1051.61	0.130851	490.252	0.99858	561.358	0.908633	1.22865	0.747493	C1C1	e1e4
19	45	C1C1 rho e1e4 pr60	SOE	30	6	SOE_30	r19c45	1072.3	0.122377	492.028	0.999324	580.277	0.926515	1.14908	0.772686	C1C1	e1e4
18	45	C1C1 rho e1e4 pr60	SOE	30	6	SOE_30	r18c45	1082.93	0.12091	506.358	0.999115	576.57	0.935693	1.13531	0.767749	C1C1	e1e4
18	46	C1C1 rho e1e4 pr60	SOE	30	6	SOE_30	r18c46	1135.95	0.117314	489.075	0.999329	646.879	0.98151	1.10154	0.861371	C1C1	e1e4
18	43	C1C1 rho e1e4 pr60	SOE	30	6	SOE_30	r18c43	1086.74	0.136627	517.866	0.99942	568.877	0.93899	1.28288	0.757505	C1C1	e1e4
14	42	C1C1 rho c1s1 d124	SOE	30	4	SOE_30	r14c42	1096.14	0.153127	487.593	0.998752	608.542	1.02026	1.12651	0.83258	C1C1	c1s1
15	46	C1C1 rho c1s1 d124	SOE	30	4	SOE_30	r15c46	1281.67	0.1174	531.71	0.999375	749.964	1.19296	0.86368	1.02607	C1C1	c1s1
15	43	C1C1 rho c1s1 d124	SOE	30	4	SOE_30	r15c43	1082.17	0.152675	470.936	0.999471	611.229	1.00726	1.12319	0.836256	C1C1	c1s1
15	44	C1C1 rho c1s1 d124	SOE	30	4	SOE_30	r15c44	1134.48	0.143125	501.224	0.99927	633.253	1.05595	1.05293	0.866388	C1C1	c1s1
15	45	C1C1 rho c1s1 d124	SOE	30	4	SOE_30	r15c45	1112.66	0.135434	461.041	0.999667	651.62	1.03564	0.996348	0.891517	C1C1	c1s1
15	42	C1C1 rho c1s1 d124	SOE	30	4	SOE_30	r15c42	1093.43	0.154647	482.584	0.999423	610.846	1.01774	1.13769	0.835733	C1C1	c1s1
14	43	C1C1 rho c1s1 d124	SOE	30	4	SOE_30	r14c43	1090.08	0.150364	483.161	0.999286	606.92	1.01463	1.10619	0.83036	C1C1	c1s1
14	44	C1C1 rho c1s1 d124	SOE	30	4	SOE_30	r14c44	1159.77	0.14031	522.87	0.999248	636.903	1.07949	1.03223	0.871382	C1C1	c1s1
14	45	C1C1 rho c1s1 d124	SOE	30	4	SOE_30	r14c45	1158.25	0.130468	500.455	0.999253	657.793	1.07807	0.959815	0.899962	C1C1	c1s1
14	46	C1C1 rho c1s1 d124	SOE	30	4	SOE_30	r14c46	1244.54	0.122549	499.008	0.999192	745.528	1.15839	0.90156	1.02	C1C1	c1s1
10	6	C1C1 rho c1e1 pr25	SOE	30	1	SOE_30	r10c6	1029.16	0.153666	427.518	0.999757	601.643	0.96976	1.12475	0.839872	C1C1	c1e1
10	7	C1C1 rho c1e1 pr25	SOE	30	1	SOE_30	r10c7	1068.26	0.154295	459.651	0.999638	608.613	1.00661	1.12935	0.849603	C1C1	c1e1
10	3	C1C1 rho c1e1 pr25	SOE	30	1	SOE_30	r10c3	1152.94	0.128799	439.109	0.999638	713.835	1.0864	0.942734	0.996488	C1C1	c1e1
10	4	C1C1 rho c1e1 pr25	SOE	30	1	SOE_30	r10c4	1086.62	0.138831	439.333	0.999827	647.287	1.0239	1.01616	0.90359	C1C1	c1e1
10	5	C1C1 rho c1e1 pr25	SOE	30	1	SOE_30	r10c5	1069.28	0.145188	445.108	0.999736	624.169	1.00756	1.06269	0.871317	C1C1	c1e1
11	5	C1C1 rho c1e1 pr25	SOE	30	1	SOE_30	r11c5	1052.67	0.1473	426.415	0.999692	626.253	0.99191	1.07815	0.874227	C1C1	c1e1
11	6	C1C1 rho c1e1 pr25	SOE	30	1	SOE_30	r11c6	1037.2	0.161523	421.878	0.999826	615.319	0.977332	1.18225	0.858963	C1C1	c1e1
11	7	C1C1 rho c1e1 pr25	SOE	30	1	SOE_30	r11c7	988.013	0.17107	384.227	0.999416	603.786	0.930987	1.25213	0.842864	C1C1	c1e1
11	3	C1C1 rho c1e1 pr25	SOE	30	1	SOE_30	r11c3	1149.83	0.132105	435.256	0.999605	714.578	1.08347	0.966934	0.997526	C1C1	c1e1
11	4	C1C1 rho c1e1 pr25	SOE	30	1	SOE_30	r11c4	1144.91	0.133152	491.098	0.999359	653.814	1.07883	0.974594	0.912702	C1C1	c1e1
14	15	C1C1 rho c1e1 pr38	YPEG	30	1	YPEG_30	r14c15	2624.39	0.0711167	372.358	0.998865	2252.03	1.78259	1.17022	1.7605	C1C1	c1e1
14	14	C1C1 rho c1e1 pr38	YPEG	30	1	YPEG_30	r14c14	2708.88	0.0698551	401.453	0.998796	2307.43	1.83998	1.14946	1.8038	C1C1	c1e1
14	13	C1C1 rho c1e1 pr38	YPEG	30	1	YPEG_30	r14c13	2631.02	0.0706414	377.11	0.998993	2253.91	1.78709	1.1624	1.76197	C1C1	c1e1
14	12	C1C1 rho c1e1 pr38	YPEG	30	1	YPEG_30	r14c12	2678.73	0.0701098	396.675	0.998807	2282.05	1.81949	1.15365	1.78396	C1C1	c1e1
15	10	C1C1 rho c1e1 pr38	YPEG	30	1	YPEG_30	r15c10	2630.03	0.069983	385.324	0.998742	2244.7	1.78642	1.15156	1.75477	C1C1	c1e1
15	15	C1C1 rho c1e1 pr38	YPEG	30	1	YPEG_30	r15c15	2630.12	0.0711731	375.516	0.998878	2254.6	1.78648	1.17114	1.7625	C1C1	c1e1
15	14	C1C1 rho c1e1 pr38	YPEG	30	1	YPEG_30	r15c14	2539.67	0.0724215	347.24	0.998987	2192.43	1.72504	1.19169	1.7139	C1C1	c1e1
15	13	C1C1 rho c1e1 pr38	YPEG	30	1	YPEG_30	r15c13	2511.17	0.0719792	341.788	0.999015	2169.38	1.70568	1.18441	1.69588	C1C1	c1e1
15	12	C1C1 rho c1e1 pr38	YPEG	30	1	YPEG_30	r15c12	2596.32	0.0707464	373.69	0.998998	2222.63	1.76352	1.16412	1.73751	C1C1	c1e1
15	11	C1C1 rho c1e1 pr38	YPEG	30	1	YPEG_30	r15c11	2601.07	0.0706908	373.82	0.998902	2227.25	1.76675	1.16321	1.74112	C1C1	c1e1
14	11	C1C1 rho c1e1 pr38	YPEG	30	1	YPEG_30	r14c11	2636.21	0.070509	384.403	0.99884	2251.81	1.79062	1.16022	1.76032	C1C1	c1e1
14	10	C1C1 rho c1e1 pr38	YPEG	30	1	YPEG_30	r14c10	2617.66	0.0708214	379.09	0.998895	2238.57	1.77802	1.16536	1.74997	C1C1	c1e1
19	18	C1C1 rho c1e1 pr57	YPEG	37	2	YPEG_37	r19c18	2780.37	0.0495568	453.059	0.996863	2327.31	2.35121	0.727993	2.29206	C1C1	c1e1
19	20	C1C1 rho c1e1 pr57	YPEG	37	2	YPEG_37	r19c20	2590.45	0.0509584	413.713	0.997057	2176.74	2.1906	0.748582	2.14377	C1C1	c1e1
19	19	C1C1 rho c1e1 pr57	YPEG	37	2	YPEG_37	r19c19	2588.32	0.051278	399.707	0.99686	2188.62	2.18881	0.753278	2.15547	C1C1	c1e1
19	21	C1C1 rho c1e1 pr57	YPEG	37	2	YPEG_37	r19c21	2594	0.0516482	416.993	0.997069	2177.01	2.1936	0.758715	2.14403	C1C1	c1e1
18	18	C1C1 rho c1e1 pr57	YPEG	37	2	YPEG_37	r18c18	2829.76	0.048908	459.767	0.997033	2370	2.39298	0.718462	2.3341	C1C1	c1e1
18	19	C1C1 rho c1e1 pr57	YPEG	37	2	YPEG_37	r18c19	2681.27	0.0499861	420.625	0.996956	2260.64	2.2674	0.734299	2.2264	C1C1	c1e1
18	20	C1C1 rho c1e1 pr57	YPEG	37	2	YPEG_37	r18c20	2789.61	0.0503959	468.063	0.996765	2321.55	2.35902	0.74032	2.28639	C1C1	c1e1
18	21	C1C1 rho c1e1 pr57	YPEG	37	2	YPEG_37	r18c21	2527.25	0.051828	389.741	0.997132	2137.51	2.13716	0.761357	2.10513	C1C1	c1e1
18	23	C1C1 rho c1e1 pr57	YPEG	37	2	YPEG_37	r18c23	2569.1	0.0518771	407.844	0.997164	2161.26	2.17255	0.762078	2.12852	C1C1	c1e1
18	22	C1C1 rho c1e1 pr57	YPEG	37	2	YPEG_37	r18c22	2606.4	0.0517459	419.589	0.997012	2186.81	2.20409	0.760151	2.15369	C1C1	c1e1
19	22	C1C1 rho c1e1 pr57	YPEG	37	2	YPEG_37	r19c22	2580.36	0.0520166	416.323	0.996998	2164.04	2.18207	0.764127	2.13126	C1C1	c1e1
19	23	C1C1 rho c1e1 pr57	YPEG	37	2	YPEG_37	r19c23	2625.74	0.0521708	424.821	0.996929	2200.92	2.22045	0.766393	2.16758	C1C1	c1e1
3	23	C1C1 rho e1e4 pr9	SOE	37	6	SOE_37	r3c23	1043.3	0.211111	287.386	0.997134	755.914	1.0338	1.69065	1.10687	C1C1	e1e4
3	22	C1C1 rho e1e4 pr9	SOE	37	6	SOE_37	r3c22	1094.4	0.204665	319.207	0.997475	775.188	1.08443	1.63903	1.13509	C1C1	e1e4
3	18	C1C1 rho e1e4 pr9	SOE	37	6	SOE_37	r3c18	1118.8	0.205837	325.317	0.997246	793.482	1.10861	1.64841	1.16188	C1C1	e1e4
3	21	C1C1 rho e1e4 pr9	SOE	37	6	SOE_37	r3c21	1045.96	0.210801	289.136	0.996829	756.826	1.03644	1.68817	1.10821	C1C1	e1e4
3	19	C1C1 rho e1e4 pr9	SOE	37	6	SOE_37	r3c19	1069.76	0.206579	306.558	0.998054	763.203	1.06002	1.65435	1.11755	C1C1	e1e4
3	20	C1C1 rho e1e4 pr9	SOE	37	6	SOE_37	r3c20	1137.15	0.199856	353.346	0.997765	783.806	1.1268	1.60052	1.14771	C1C1	e1e4
19	15	C1C1 rho e1e4 pr50	SOE	37	5	SOE_37	r19c15	962.737	0.220855	305.964	0.995654	656.773	0.928074	1.72545	0.954554	C1C1	e1e4
19	12	C1C1 rho e1e4 pr50	SOE	37	5	SOE_37	r19c12	1051.42	0.197716	389.356	0.997161	662.062	1.01356	1.54467	0.962241	C1C1	e1e4
19	11	C1C1 rho e1e4 pr50	SOE	37	5	SOE_37	r19c11	1101.53	0.187557	431.954	0.998738	669.577	1.06187	1.46531	0.973163	C1C1	e1e4
19	13	C1C1 rho e1e4 pr50	SOE	37	5	SOE_37	r19c13	1028.32	0.213501	344.54	0.997261	683.784	0.991299	1.668	0.993811	C1C1	e1e4
19	14	C1C1 rho e1e4 pr50	SOE	37	5	SOE_37	r19c14	1033.82	0.204521	356.948	0.997837	676.871	0.996596	1.59784	0.983764	C1C1	e1e4
19	10	C1C1 rho e1e4 pr50	SOE	37	5	SOE_37	r19c10	1048.01	0.199902	382.231	0.9979	665.775	1.01027	1.56175	0.967637	C1C1	e1e4
18	14	C1C1 rho e1e4 pr50	SOE	37	5	SOE_37	r18c14	1100.79	0.193799	406.332	0.997917	694.457	1.06116	1.51407	1.00932	C1C1	e1e4
18	15	C1C1 rho e1e4 pr50	SOE	37	5	SOE_37	r18c15	1105.96	0.183818	429.424	0.998226	676.537	1.06614	1.4361	0.983279	C1C1	e1e4
18	11	C1C1 rho e1e4 pr50	SOE	37	5	SOE_37	r18c11	1052.81	0.199635	376.931	0.997523	675.878	1.0149	1.55967	0.982321	C1C1	e1e4
18	10	C1C1 rho e1e4 pr50	SOE	37	5	SOE_37	r18c10	1075.82	0.180666	427.688	0.998863	648.129	1.03708	1.41147	0.941991	C1C1	e1e4
18	13	C1C1 rho e1e4 pr50	SOE	37	5	SOE_37	r18c13	1066.71	0.200568	382.105	0.997816	684.601	1.0283	1.56695	0.994999	C1C1	e1e4
18	12	C1C1 rho e1e4 pr50	SOE	37	5	SOE_37	r18c12	1080.56	0.190444	409.056	0.998045	671.505	1.04166	1.48787	0.975965	C1C1	e1e4
3	15	C1C1 rho c1s1 d89	YPD	37	4	YPD_37	r3c15	2161.91	0.111908	547.535	0.987049	1614.38	1.36945	0.658411	1.35702	C1C1	c1s1
3	12	C1C1 rho c1s1 d89	YPD	37	4	YPD_37	r3c12	2242.51	0.105048	570.491	0.98627	1672.02	1.42051	0.618053	1.40548	C1C1	c1s1
3	14	C1C1 rho c1s1 d89	YPD	37	4	YPD_37	r3c14	2216.15	0.110348	568.458	0.986335	1647.69	1.40381	0.649237	1.38503	C1C1	c1s1
3	13	C1C1 rho c1s1 d89	YPD	37	4	YPD_37	r3c13	2222.43	0.107555	569.411	0.986984	1653.02	1.40778	0.6328	1.38951	C1C1	c1s1
3	10	C1C1 rho c1s1 d89	YPD	37	4	YPD_37	r3c10	2444.68	0.094226	617.349	0.985042	1827.33	1.54856	0.55438	1.53603	C1C1	c1s1
3	11	C1C1 rho c1s1 d89	YPD	37	4	YPD_37	r3c11	2413.19	0.0997373	620.611	0.985195	1792.57	1.52862	0.586806	1.50681	C1C1	c1s1
6	23	C1C1 rho c1e1 pr21	YPD	37	2	YPD_37	r6c23	2400.64	0.116165	699.334	0.988079	1701.3	1.47953	0.670537	1.38613	C1C1	c1e1
6	20	C1C1 rho c1e1 pr21	YPD	37	2	YPD_37	r6c20	2412	0.118233	684.192	0.986029	1727.8	1.48653	0.682472	1.40772	C1C1	c1e1
6	22	C1C1 rho c1e1 pr21	YPD	37	2	YPD_37	r6c22	2288.66	0.119026	622.07	0.986402	1666.59	1.41052	0.687054	1.35785	C1C1	c1e1
6	21	C1C1 rho c1e1 pr21	YPD	37	2	YPD_37	r6c21	2359.91	0.117222	660.33	0.986286	1699.58	1.45443	0.676637	1.38472	C1C1	c1e1
6	19	C1C1 rho c1e1 pr21	YPD	37	2	YPD_37	r6c19	2343.77	0.115916	654.469	0.986328	1689.3	1.44448	0.669099	1.37635	C1C1	c1e1
6	18	C1C1 rho c1e1 pr21	YPD	37	2	YPD_37	r6c18	2389.23	0.115355	675.272	0.986252	1713.96	1.4725	0.665865	1.39644	C1C1	c1e1
7	18	C1C1 rho c1e1 pr21	YPD	37	2	YPD_37	r7c18	2382.86	0.114058	690.601	0.98643	1692.26	1.46857	0.658376	1.37876	C1C1	c1e1
7	21	C1C1 rho c1e1 pr21	YPD	37	2	YPD_37	r7c21	2418.1	0.11701	709.286	0.987462	1708.81	1.49029	0.675414	1.39224	C1C1	c1e1
7	22	C1C1 rho c1e1 pr21	YPD	37	2	YPD_37	r7c22	2432.41	0.117463	715.617	0.987792	1716.79	1.49911	0.678032	1.39875	C1C1	c1e1
7	19	C1C1 rho c1e1 pr21	YPD	37	2	YPD_37	r7c19	2302.32	0.117962	649.947	0.986962	1652.37	1.41894	0.680908	1.34626	C1C1	c1e1
7	20	C1C1 rho c1e1 pr21	YPD	37	2	YPD_37	r7c20	2396.14	0.117543	699.157	0.987162	1696.98	1.47676	0.678491	1.38261	C1C1	c1e1
7	23	C1C1 rho c1e1 pr21	YPD	37	2	YPD_37	r7c23	2301.19	0.122363	633.047	0.986093	1668.14	1.41824	0.706314	1.35911	C1C1	c1e1
19	43	C1C1 rho c1s1 d86	YPEG	30	4	YPEG_30	r19c43	2947.9	0.0617853	541.641	0.999714	2406.26	2.0474	0.953137	1.89832	C1C1	c1s1
19	42	C1C1 rho c1s1 d86	YPEG	30	4	YPEG_30	r19c42	2912.94	0.0638933	523.701	0.999599	2389.24	2.02312	0.985657	1.88489	C1C1	c1s1
18	46	C1C1 rho c1s1 d86	YPEG	30	4	YPEG_30	r18c46	3184.2	0.0603402	519.24	0.999255	2664.96	2.21152	0.930844	2.10241	C1C1	c1s1
18	45	C1C1 rho c1s1 d86	YPEG	30	4	YPEG_30	r18c45	3092.46	0.0598611	536.641	0.99952	2555.82	2.1478	0.923454	2.01631	C1C1	c1s1
18	44	C1C1 rho c1s1 d86	YPEG	30	4	YPEG_30	r18c44	2976.18	0.0621574	535.631	0.999361	2440.55	2.06704	0.958877	1.92537	C1C1	c1s1
18	43	C1C1 rho c1s1 d86	YPEG	30	4	YPEG_30	r18c43	2978.74	0.0614416	556.099	0.999801	2422.64	2.06882	0.947835	1.91125	C1C1	c1s1
19	46	C1C1 rho c1s1 d86	YPEG	30	4	YPEG_30	r19c46	3168.97	0.0606462	503.882	0.998754	2665.09	2.20094	0.935565	2.10251	C1C1	c1s1
19	45	C1C1 rho c1s1 d86	YPEG	30	4	YPEG_30	r19c45	3058.13	0.0613197	518.739	0.998678	2539.39	2.12396	0.945954	2.00335	C1C1	c1s1
19	44	C1C1 rho c1s1 d86	YPEG	30	4	YPEG_30	r19c44	2938.98	0.0628885	513.182	0.99918	2425.8	2.04121	0.970156	1.91373	C1C1	c1s1
30	39	C1C1 rho E1 control 2	YPD	37	2	YPD_37	r30c39	2515.19	0.110248	716.126	0.988062	1799.06	1.55013	0.636383	1.46577	C1C1	e1
30	35	C1C1 rho E1 control 2	YPD	37	2	YPD_37	r30c35	2546.35	0.109274	760.787	0.988632	1785.57	1.56934	0.63076	1.45478	C1C1	e1
30	36	C1C1 rho E1 control 2	YPD	37	2	YPD_37	r30c36	2497.29	0.110849	730.051	0.988691	1767.24	1.5391	0.639855	1.43985	C1C1	e1
30	34	C1C1 rho E1 control 2	YPD	37	2	YPD_37	r30c34	2580.15	0.112467	767.455	0.988377	1812.7	1.59017	0.649192	1.47688	C1C1	e1
30	38	C1C1 rho E1 control 2	YPD	37	2	YPD_37	r30c38	2512.77	0.110956	724.662	0.987581	1788.11	1.54864	0.640472	1.45685	C1C1	e1
30	37	C1C1 rho E1 control 2	YPD	37	2	YPD_37	r30c37	2564.39	0.109672	764.353	0.98878	1800.03	1.58045	0.633059	1.46657	C1C1	e1
3	6	Ref	YPD	37	4	YPD_37	r3c6	1528.25	0.18171	376.056	0.992548	1152.2	0.968062	1.06909	0.968522	Ref	Ref
3	5	Ref	YPD	37	4	YPD_37	r3c5	1577.07	0.169825	395.928	0.992404	1181.14	0.998987	0.999168	0.992854	Ref	Ref
3	7	Ref	YPD	37	4	YPD_37	r3c7	1476.09	0.190518	363.424	0.99314	1112.67	0.93502	1.12092	0.935293	Ref	Ref
3	3	Ref	YPD	37	4	YPD_37	r3c3	1709.16	0.147339	417.596	0.992512	1291.57	1.08266	0.866871	1.08567	Ref	Ref
3	4	Ref	YPD	37	4	YPD_37	r3c4	1602.78	0.16044	392.131	0.991712	1210.65	1.01527	0.943949	1.01766	Ref	Ref
7	35	C1C1 rho e1e4 pr23	YPEG	30	6	YPEG_30	r7c35	2811.32	0.0623614	425.392	0.998144	2385.93	1.8879	1.00184	1.82893	C1C1	e1e4
7	34	C1C1 rho e1e4 pr23	YPEG	30	6	YPEG_30	r7c34	2811.14	0.0622204	421.434	0.998373	2389.7	1.88777	0.99958	1.83182	C1C1	e1e4
7	39	C1C1 rho e1e4 pr23	YPEG	30	6	YPEG_30	r7c39	2731.86	0.0620834	422.713	0.998206	2309.14	1.83453	0.99738	1.77007	C1C1	e1e4
7	38	C1C1 rho e1e4 pr23	YPEG	30	6	YPEG_30	r7c38	2738.92	0.0623735	413.531	0.998291	2325.39	1.83928	1.00204	1.78252	C1C1	e1e4
7	37	C1C1 rho e1e4 pr23	YPEG	30	6	YPEG_30	r7c37	2827.1	0.0619522	440.519	0.998307	2386.58	1.89849	0.995272	1.82943	C1C1	e1e4
7	36	C1C1 rho e1e4 pr23	YPEG	30	6	YPEG_30	r7c36	2844.01	0.0618117	438.902	0.998148	2405.11	1.90985	0.993015	1.84363	C1C1	e1e4
6	39	C1C1 rho e1e4 pr23	YPEG	30	6	YPEG_30	r6c39	2804.01	0.0610273	443.06	0.998207	2360.95	1.88299	0.980413	1.80978	C1C1	e1e4
6	38	C1C1 rho e1e4 pr23	YPEG	30	6	YPEG_30	r6c38	2861.86	0.0611843	453.906	0.998196	2407.96	1.92184	0.982936	1.84581	C1C1	e1e4
6	37	C1C1 rho e1e4 pr23	YPEG	30	6	YPEG_30	r6c37	2839.83	0.0605334	439.05	0.998218	2400.78	1.90704	0.972479	1.84031	C1C1	e1e4
6	36	C1C1 rho e1e4 pr23	YPEG	30	6	YPEG_30	r6c36	2829.65	0.0621777	439.51	0.998182	2390.14	1.9002	0.998894	1.83215	C1C1	e1e4
6	35	C1C1 rho e1e4 pr23	YPEG	30	6	YPEG_30	r6c35	2853.94	0.061379	438.003	0.998287	2415.94	1.91652	0.986063	1.85193	C1C1	e1e4
6	34	C1C1 rho e1e4 pr23	YPEG	30	6	YPEG_30	r6c34	2870.21	0.0612512	437.23	0.998239	2432.98	1.92744	0.984011	1.86499	C1C1	e1e4
18	34	C1C1 rho e1e4 pr59	SOE	30	6	SOE_30	r18c34	1084.09	0.146798	489.852	0.999279	594.24	0.936699	1.37839	0.791278	C1C1	e1e4
18	35	C1C1 rho e1e4 pr59	SOE	30	6	SOE_30	r18c35	1095.56	0.140484	513.565	0.99891	581.993	0.946606	1.3191	0.77497	C1C1	e1e4
18	36	C1C1 rho e1e4 pr59	SOE	30	6	SOE_30	r18c36	1042.92	0.137677	487.428	0.998861	555.494	0.901127	1.29274	0.739684	C1C1	e1e4
18	37	C1C1 rho e1e4 pr59	SOE	30	6	SOE_30	r18c37	1046.27	0.141915	496.413	0.999341	549.858	0.904021	1.33253	0.73218	C1C1	e1e4
18	38	C1C1 rho e1e4 pr59	SOE	30	6	SOE_30	r18c38	1058.05	0.136065	505.309	0.999375	552.743	0.9142	1.27761	0.736022	C1C1	e1e4
19	35	C1C1 rho e1e4 pr59	SOE	30	6	SOE_30	r19c35	1055.4	0.145468	483.015	0.998997	572.384	0.911907	1.36589	0.762175	C1C1	e1e4
19	36	C1C1 rho e1e4 pr59	SOE	30	6	SOE_30	r19c36	1043.5	0.141066	482.732	0.998982	560.769	0.901627	1.32456	0.746709	C1C1	e1e4
19	37	C1C1 rho e1e4 pr59	SOE	30	6	SOE_30	r19c37	1021	0.137397	486.818	0.998438	534.185	0.882188	1.29011	0.71131	C1C1	e1e4
19	38	C1C1 rho e1e4 pr59	SOE	30	6	SOE_30	r19c38	1064.2	0.136169	517.99	0.999115	546.209	0.919511	1.27858	0.72732	C1C1	e1e4
19	39	C1C1 rho e1e4 pr59	SOE	30	6	SOE_30	r19c39	1003.37	0.142161	473.994	0.998465	529.376	0.866953	1.33484	0.704907	C1C1	e1e4
18	39	C1C1 rho e1e4 pr59	SOE	30	6	SOE_30	r18c39	992.715	0.138824	467.648	0.998452	525.067	0.857746	1.30352	0.699168	C1C1	e1e4
22	7	C1C1 rho c1e1 pr67	YPEG	37	2	YPEG_37	r22c7	2826.27	0.0509837	498.037	0.996867	2328.23	2.39002	0.748954	2.29297	C1C1	c1e1
22	3	C1C1 rho c1e1 pr67	YPEG	37	2	YPEG_37	r22c3	2972.99	0.0459955	445.147	0.997023	2527.84	2.51409	0.675677	2.48955	C1C1	c1e1
22	4	C1C1 rho c1e1 pr67	YPEG	37	2	YPEG_37	r22c4	2812.14	0.0464051	426.122	0.996627	2386.02	2.37808	0.681694	2.34988	C1C1	c1e1
22	5	C1C1 rho c1e1 pr67	YPEG	37	2	YPEG_37	r22c5	2776.08	0.0488994	448.324	0.996653	2327.75	2.34758	0.718335	2.2925	C1C1	c1e1
22	6	C1C1 rho c1e1 pr67	YPEG	37	2	YPEG_37	r22c6	2787.01	0.0497804	473.317	0.996482	2313.69	2.35682	0.731278	2.27865	C1C1	c1e1
23	3	C1C1 rho c1e1 pr67	YPEG	37	2	YPEG_37	r23c3	3019.42	0.0464171	471.316	0.997307	2548.1	2.55336	0.68187	2.5095	C1C1	c1e1
23	4	C1C1 rho c1e1 pr67	YPEG	37	2	YPEG_37	r23c4	2946.06	0.0462138	481.457	0.996669	2464.6	2.49132	0.678884	2.42727	C1C1	c1e1
23	5	C1C1 rho c1e1 pr67	YPEG	37	2	YPEG_37	r23c5	2516.86	0.0489191	368.234	0.997301	2148.62	2.12837	0.718625	2.11608	C1C1	c1e1
23	6	C1C1 rho c1e1 pr67	YPEG	37	2	YPEG_37	r23c6	2792	0.049129	474.963	0.996288	2317.03	2.36104	0.721709	2.28194	C1C1	c1e1
23	7	C1C1 rho c1e1 pr67	YPEG	37	2	YPEG_37	r23c7	2728.51	0.0499939	463.084	0.996056	2265.43	2.30735	0.734414	2.23111	C1C1	c1e1
11	23	C1C1 rho c1e1 pr33	SOE	30	2	SOE_30	r11c23	1129.19	0.193474	359.685	0.998302	769.502	1.00252	1.23215	0.958478	C1C1	c1e1
11	20	C1C1 rho c1e1 pr33	SOE	30	2	SOE_30	r11c20	1188.1	0.18746	397.693	0.998632	790.403	1.05482	1.19385	0.984511	C1C1	c1e1
11	21	C1C1 rho c1e1 pr33	SOE	30	2	SOE_30	r11c21	1166.39	0.198818	372.894	0.998527	793.496	1.03555	1.26618	0.988364	C1C1	c1e1
11	22	C1C1 rho c1e1 pr33	SOE	30	2	SOE_30	r11c22	1179.61	0.198097	373.139	0.998489	806.471	1.04728	1.26159	1.00453	C1C1	c1e1
11	18	C1C1 rho c1e1 pr33	SOE	30	2	SOE_30	r11c18	1201.7	0.201486	379.136	0.998404	822.561	1.06689	1.28317	1.02457	C1C1	c1e1
11	19	C1C1 rho c1e1 pr33	SOE	30	2	SOE_30	r11c19	1155.52	0.205134	354.499	0.998318	801.017	1.02589	1.30641	0.997732	C1C1	c1e1
10	20	C1C1 rho c1e1 pr33	SOE	30	2	SOE_30	r10c20	1185.04	0.191569	389.275	0.998695	795.766	1.05211	1.22002	0.991192	C1C1	c1e1
10	21	C1C1 rho c1e1 pr33	SOE	30	2	SOE_30	r10c21	1159.16	0.204345	357.646	0.998202	801.517	1.02913	1.30138	0.998356	C1C1	c1e1
10	22	C1C1 rho c1e1 pr33	SOE	30	2	SOE_30	r10c22	1178.11	0.185914	393.697	0.998654	784.409	1.04595	1.184	0.977046	C1C1	c1e1
10	23	C1C1 rho c1e1 pr33	SOE	30	2	SOE_30	r10c23	1156.78	0.194433	371.09	0.998467	785.693	1.02702	1.23825	0.978645	C1C1	c1e1
10	18	C1C1 rho c1e1 pr33	SOE	30	2	SOE_30	r10c18	1160.52	0.192079	383.435	0.998424	777.085	1.03034	1.22326	0.967924	C1C1	c1e1
10	19	C1C1 rho c1e1 pr33	SOE	30	2	SOE_30	r10c19	1165.9	0.192671	378.516	0.998407	787.379	1.03511	1.22703	0.980746	C1C1	c1e1
23	13	C1C1 rho c1e1 pr62	SOE	37	1	SOE_37	r23c13	817.92	0.213663	176.92	0.999033	641	1.04506	1.53344	1.02613	C1C1	c1e1
23	14	C1C1 rho c1e1 pr62	SOE	37	1	SOE_37	r23c14	781.903	0.209113	163.338	0.998961	618.565	0.999038	1.50078	0.990218	C1C1	c1e1
23	12	C1C1 rho c1e1 pr62	SOE	37	1	SOE_37	r23c12	794.458	0.209171	171.803	0.998741	622.655	1.01508	1.5012	0.996766	C1C1	c1e1
23	15	C1C1 rho c1e1 pr62	SOE	37	1	SOE_37	r23c15	858.069	0.213859	182.977	0.998956	675.092	1.09636	1.53485	1.08071	C1C1	c1e1
23	11	C1C1 rho c1e1 pr62	SOE	37	1	SOE_37	r23c11	848.793	0.21105	193.072	0.998991	655.721	1.0845	1.51468	1.0497	C1C1	c1e1
23	10	C1C1 rho c1e1 pr62	SOE	37	1	SOE_37	r23c10	789.217	0.216767	165.964	0.999008	623.253	1.00838	1.55572	0.997722	C1C1	c1e1
22	13	C1C1 rho c1e1 pr62	SOE	37	1	SOE_37	r22c13	785.179	0.216978	161.666	0.998866	623.513	1.00322	1.55723	0.998138	C1C1	c1e1
22	12	C1C1 rho c1e1 pr62	SOE	37	1	SOE_37	r22c12	823.184	0.214179	179.196	0.998902	643.988	1.05178	1.53714	1.03092	C1C1	c1e1
22	15	C1C1 rho c1e1 pr62	SOE	37	1	SOE_37	r22c15	775.608	0.213972	156.132	0.998874	619.476	0.990995	1.53565	0.991677	C1C1	c1e1
22	14	C1C1 rho c1e1 pr62	SOE	37	1	SOE_37	r22c14	875.184	0.211653	191.376	0.999131	683.809	1.11822	1.51902	1.09466	C1C1	c1e1
22	11	C1C1 rho c1e1 pr62	SOE	37	1	SOE_37	r22c11	808.512	0.209881	180.916	0.999207	627.596	1.03304	1.50629	1.00467	C1C1	c1e1
22	10	C1C1 rho c1e1 pr62	SOE	37	1	SOE_37	r22c10	799.072	0.220725	171.711	0.99896	627.361	1.02097	1.58412	1.0043	C1C1	c1e1
22	35	C1C1 rho c1e4 pr38	YPD	37	3	YPD_37	r22c35	2341.82	0.100761	836.271	0.986826	1505.55	1.4626	0.604192	1.26302	C1C1	c1e4
22	37	C1C1 rho c1e4 pr38	YPD	37	3	YPD_37	r22c37	2372.14	0.100504	858.666	0.9872	1513.47	1.48154	0.60265	1.26967	C1C1	c1e4
22	36	C1C1 rho c1e4 pr38	YPD	37	3	YPD_37	r22c36	2294.65	0.103209	799.288	0.986619	1495.36	1.43314	0.618866	1.25447	C1C1	c1e4
22	34	C1C1 rho c1e4 pr38	YPD	37	3	YPD_37	r22c34	2337.53	0.102028	841.239	0.987394	1496.29	1.45992	0.611789	1.25525	C1C1	c1e4
22	38	C1C1 rho c1e4 pr38	YPD	37	3	YPD_37	r22c38	2355.41	0.099749	847.99	0.987204	1507.42	1.47109	0.598122	1.26459	C1C1	c1e4
22	39	C1C1 rho c1e4 pr38	YPD	37	3	YPD_37	r22c39	2364.16	0.0998265	847.379	0.987356	1516.78	1.47655	0.598587	1.27244	C1C1	c1e4
23	38	C1C1 rho c1e4 pr38	YPD	37	3	YPD_37	r23c38	2358.52	0.100676	840.611	0.98725	1517.91	1.47303	0.603682	1.27338	C1C1	c1e4
23	39	C1C1 rho c1e4 pr38	YPD	37	3	YPD_37	r23c39	2349.61	0.0992197	837.383	0.986422	1512.23	1.46747	0.594948	1.26862	C1C1	c1e4
23	36	C1C1 rho c1e4 pr38	YPD	37	3	YPD_37	r23c36	2318.17	0.100556	827.882	0.987299	1490.29	1.44783	0.602962	1.25022	C1C1	c1e4
23	37	C1C1 rho c1e4 pr38	YPD	37	3	YPD_37	r23c37	2325.53	0.102093	817.837	0.986742	1507.69	1.45243	0.612176	1.26482	C1C1	c1e4
23	35	C1C1 rho c1e4 pr38	YPD	37	3	YPD_37	r23c35	2309.95	0.102417	810.592	0.986779	1499.36	1.4427	0.614119	1.25782	C1C1	c1e4
23	34	C1C1 rho c1e4 pr38	YPD	37	3	YPD_37	r23c34	2395.07	0.1002	871.235	0.987078	1523.83	1.49585	0.600828	1.27835	C1C1	c1e4
15	15	C1C1 rho e1e4 pr44	YPEG	30	6	YPEG_30	r15c15	2694.97	0.0644914	417.481	0.998181	2277.49	1.80977	1.03607	1.74581	C1C1	e1e4
15	14	C1C1 rho e1e4 pr44	YPEG	30	6	YPEG_30	r15c14	2594.6	0.0655471	377.323	0.998594	2217.28	1.74236	1.05302	1.69965	C1C1	e1e4
15	13	C1C1 rho e1e4 pr44	YPEG	30	6	YPEG_30	r15c13	2598.34	0.0658764	380.217	0.998529	2218.12	1.74487	1.05831	1.70029	C1C1	e1e4
15	12	C1C1 rho e1e4 pr44	YPEG	30	6	YPEG_30	r15c12	2637.36	0.0647901	398.306	0.998404	2239.05	1.77107	1.04086	1.71634	C1C1	e1e4
14	13	C1C1 rho e1e4 pr44	YPEG	30	6	YPEG_30	r14c13	2681.66	0.064598	413.296	0.998369	2268.36	1.80082	1.03778	1.7388	C1C1	e1e4
14	12	C1C1 rho e1e4 pr44	YPEG	30	6	YPEG_30	r14c12	2731.04	0.0642078	424.268	0.998248	2306.77	1.83398	1.03151	1.76825	C1C1	e1e4
14	11	C1C1 rho e1e4 pr44	YPEG	30	6	YPEG_30	r14c11	2767.86	0.0626413	422.53	0.998291	2345.33	1.85871	1.00634	1.7978	C1C1	e1e4
14	10	C1C1 rho e1e4 pr44	YPEG	30	6	YPEG_30	r14c10	2708.99	0.0636175	407.913	0.998459	2301.08	1.81918	1.02202	1.76389	C1C1	e1e4
14	15	C1C1 rho e1e4 pr44	YPEG	30	6	YPEG_30	r14c15	2708.16	0.0644022	425.178	0.998383	2282.98	1.81862	1.03463	1.75001	C1C1	e1e4
14	14	C1C1 rho e1e4 pr44	YPEG	30	6	YPEG_30	r14c14	2727	0.0643831	417.886	0.99834	2309.11	1.83127	1.03432	1.77004	C1C1	e1e4
15	11	C1C1 rho e1e4 pr44	YPEG	30	6	YPEG_30	r15c11	2681.42	0.0638464	408.396	0.998314	2273.02	1.80066	1.0257	1.74238	C1C1	e1e4
15	10	C1C1 rho e1e4 pr44	YPEG	30	6	YPEG_30	r15c10	2707.52	0.0636569	410.396	0.998257	2297.12	1.81819	1.02266	1.76085	C1C1	e1e4
3	36	C1C1 rho e1e4 pr5	SOE	30	5	SOE_30	r3c36	1015.76	0.181727	324.616	0.998396	691.148	0.901691	1.44076	0.885825	C1C1	e1e4
3	37	C1C1 rho e1e4 pr5	SOE	30	5	SOE_30	r3c37	1007.02	0.178962	320.78	0.998595	686.239	0.893928	1.41884	0.879534	C1C1	e1e4
3	38	C1C1 rho e1e4 pr5	SOE	30	5	SOE_30	r3c38	1019.07	0.185636	324.01	0.997119	695.057	0.904623	1.47176	0.890836	C1C1	e1e4
3	39	C1C1 rho e1e4 pr5	SOE	30	5	SOE_30	r3c39	962.535	0.176533	312.089	0.998261	650.446	0.854439	1.39958	0.833658	C1C1	e1e4
3	34	C1C1 rho e1e4 pr5	SOE	30	5	SOE_30	r3c34	993.202	0.18195	306.537	0.998603	686.664	0.881662	1.44253	0.880079	C1C1	e1e4
3	35	C1C1 rho e1e4 pr5	SOE	30	5	SOE_30	r3c35	973.672	0.176902	299.531	0.998615	674.141	0.864326	1.40251	0.864028	C1C1	e1e4
3	36	C1C1 rho c1e1 pr 5	SOE	37	1	SOE_37	r3c36	860.326	0.197267	172.932	0.998378	687.395	1.09924	1.41577	1.1004	C1C1	c1e1
3	39	C1C1 rho c1e1 pr 5	SOE	37	1	SOE_37	r3c39	849.467	0.200117	160.926	0.99846	688.541	1.08536	1.43622	1.10224	C1C1	c1e1
3	35	C1C1 rho c1e1 pr 5	SOE	37	1	SOE_37	r3c35	859.391	0.202061	162.853	0.998161	696.537	1.09804	1.45017	1.11504	C1C1	c1e1
3	34	C1C1 rho c1e1 pr 5	SOE	37	1	SOE_37	r3c34	860.234	0.197326	173.412	0.998613	686.822	1.09912	1.41619	1.09949	C1C1	c1e1
11	18	C1C1 rho c1e1 pr27	YPEG	37	1	YPEG_37	r11c18	2796.17	0.0506177	443.406	0.997114	2352.77	2.2474	0.746846	2.20303	C1C1	c1e1
11	19	C1C1 rho c1e1 pr27	YPEG	37	1	YPEG_37	r11c19	2621.77	0.0501952	395.273	0.997465	2226.5	2.10722	0.740612	2.0848	C1C1	c1e1
11	20	C1C1 rho c1e1 pr27	YPEG	37	1	YPEG_37	r11c20	2713.15	0.0499587	416.296	0.997503	2296.85	2.18067	0.737122	2.15067	C1C1	c1e1
11	21	C1C1 rho c1e1 pr27	YPEG	37	1	YPEG_37	r11c21	2702.22	0.0501677	411.34	0.997565	2290.88	2.17188	0.740206	2.14508	C1C1	c1e1
11	22	C1C1 rho c1e1 pr27	YPEG	37	1	YPEG_37	r11c22	2716.48	0.0502256	411.272	0.997394	2305.21	2.18335	0.74106	2.1585	C1C1	c1e1
10	18	C1C1 rho c1e1 pr27	YPEG	37	1	YPEG_37	r10c18	2802.18	0.0497366	436.692	0.997497	2365.49	2.25223	0.733846	2.21495	C1C1	c1e1
10	19	C1C1 rho c1e1 pr27	YPEG	37	1	YPEG_37	r10c19	2797.55	0.0490288	430.258	0.997356	2367.29	2.2485	0.723403	2.21663	C1C1	c1e1
10	20	C1C1 rho c1e1 pr27	YPEG	37	1	YPEG_37	r10c20	2840.7	0.0496017	435.618	0.997273	2405.08	2.28318	0.731855	2.25202	C1C1	c1e1
10	21	C1C1 rho c1e1 pr27	YPEG	37	1	YPEG_37	r10c21	2793.1	0.0497083	421.134	0.997282	2371.97	2.24493	0.733428	2.22101	C1C1	c1e1
10	23	C1C1 rho c1e1 pr27	YPEG	37	1	YPEG_37	r10c23	2724.51	0.0503075	408.523	0.997841	2315.99	2.1898	0.742269	2.1686	C1C1	c1e1
10	22	C1C1 rho c1e1 pr27	YPEG	37	1	YPEG_37	r10c22	2786.09	0.0497291	419.201	0.997609	2366.89	2.23929	0.733736	2.21625	C1C1	c1e1
11	23	C1C1 rho c1e1 pr27	YPEG	37	1	YPEG_37	r11c23	2720.97	0.0504898	417.33	0.997403	2303.64	2.18695	0.744959	2.15703	C1C1	c1e1
23	14	C1C1 rho e1e4 pr62	YPEG	37	5	YPEG_37	r23c14	2849.55	0.0543164	443.167	0.997713	2406.39	2.41384	0.78697	2.36822	C1C1	e1e4
23	15	C1C1 rho e1e4 pr62	YPEG	37	5	YPEG_37	r23c15	2906.63	0.0541176	464.893	0.997365	2441.74	2.46218	0.78409	2.40301	C1C1	e1e4
23	11	C1C1 rho e1e4 pr62	YPEG	37	5	YPEG_37	r23c11	2877.39	0.0542014	453.249	0.997844	2424.15	2.43742	0.785305	2.3857	C1C1	e1e4
23	13	C1C1 rho e1e4 pr62	YPEG	37	5	YPEG_37	r23c13	2895.24	0.0536394	459.574	0.997634	2435.67	2.45254	0.777161	2.39703	C1C1	e1e4
23	12	C1C1 rho e1e4 pr62	YPEG	37	5	YPEG_37	r23c12	2782.84	0.0548871	430.589	0.997963	2352.25	2.35733	0.79524	2.31495	C1C1	e1e4
23	10	C1C1 rho e1e4 pr62	YPEG	37	5	YPEG_37	r23c10	2730.71	0.0550862	388.283	0.997677	2342.43	2.31317	0.798123	2.30528	C1C1	e1e4
22	10	C1C1 rho e1e4 pr62	YPEG	37	5	YPEG_37	r22c10	2656.4	0.054512	378.206	0.998073	2278.19	2.25022	0.789804	2.24206	C1C1	e1e4
22	11	C1C1 rho e1e4 pr62	YPEG	37	5	YPEG_37	r22c11	2713.26	0.0550774	400.248	0.997933	2313.01	2.29838	0.797997	2.27632	C1C1	e1e4
22	12	C1C1 rho e1e4 pr62	YPEG	37	5	YPEG_37	r22c12	2790.39	0.0544451	422.041	0.997858	2368.35	2.36372	0.788836	2.33078	C1C1	e1e4
22	13	C1C1 rho e1e4 pr62	YPEG	37	5	YPEG_37	r22c13	2693.01	0.0550464	393.545	0.997836	2299.47	2.28123	0.797547	2.263	C1C1	e1e4
22	14	C1C1 rho e1e4 pr62	YPEG	37	5	YPEG_37	r22c14	2912.16	0.0540958	464.485	0.997454	2447.67	2.46687	0.783775	2.40885	C1C1	e1e4
22	15	C1C1 rho e1e4 pr62	YPEG	37	5	YPEG_37	r22c15	2863.64	0.0542597	451.505	0.99748	2412.13	2.42576	0.786149	2.37387	C1C1	e1e4
11	44	C1C1 rho c1s1 d110	SOE	37	4	SOE_37	r11c44	1117.18	0.160322	504.575	0.999207	612.605	1.14996	1.21694	0.964373	C1C1	c1s1
11	45	C1C1 rho c1s1 d110	SOE	37	4	SOE_37	r11c45	1087.36	0.162874	444.349	0.99869	643.011	1.11927	1.23632	1.01224	C1C1	c1s1
11	43	C1C1 rho c1s1 d110	SOE	37	4	SOE_37	r11c43	1013.64	0.18195	425.88	0.998489	587.756	1.04338	1.38111	0.925255	C1C1	c1s1
11	46	C1C1 rho c1s1 d110	SOE	37	4	SOE_37	r11c46	1235.08	0.137453	506.699	0.999011	728.381	1.27132	1.04335	1.14663	C1C1	c1s1
11	42	C1C1 rho c1s1 d110	SOE	37	4	SOE_37	r11c42	1052.36	0.185447	456.264	0.999183	596.094	1.08324	1.40766	0.938381	C1C1	c1s1
10	46	C1C1 rho c1s1 d110	SOE	37	4	SOE_37	r10c46	1206.43	0.138361	490.674	0.999565	715.752	1.24183	1.05025	1.12675	C1C1	c1s1
10	43	C1C1 rho c1s1 d110	SOE	37	4	SOE_37	r10c43	1098.58	0.175861	493.884	0.999182	604.692	1.13082	1.33489	0.951916	C1C1	c1s1
10	42	C1C1 rho c1s1 d110	SOE	37	4	SOE_37	r10c42	1033.51	0.179767	451.672	0.999528	581.838	1.06384	1.36455	0.915939	C1C1	c1s1
10	45	C1C1 rho c1s1 d110	SOE	37	4	SOE_37	r10c45	1099.18	0.157569	463.781	0.999252	635.4	1.13144	1.19605	1.00026	C1C1	c1s1
10	44	C1C1 rho c1s1 d110	SOE	37	4	SOE_37	r10c44	1066.49	0.169552	459.306	0.999191	607.182	1.09778	1.28701	0.955836	C1C1	c1s1
19	6	C1C1 rho c1s1 d87	YPEG	30	4	YPEG_30	r19c6	2929.58	0.064443	503.299	0.999462	2426.28	2.03468	0.994137	1.91412	C1C1	c1s1
19	5	C1C1 rho c1s1 d87	YPEG	30	4	YPEG_30	r19c5	2887.04	0.0670917	460.008	0.99858	2427.03	2.00513	1.035	1.91471	C1C1	c1s1
19	4	C1C1 rho c1s1 d87	YPEG	30	4	YPEG_30	r19c4	3023.62	0.0631348	483.821	0.999175	2539.8	2.09999	0.973956	2.00367	C1C1	c1s1
19	3	C1C1 rho c1s1 d87	YPEG	30	4	YPEG_30	r19c3	3153.04	0.0610206	475.563	0.999198	2677.48	2.18988	0.941341	2.11229	C1C1	c1s1
19	7	C1C1 rho c1s1 d87	YPEG	30	4	YPEG_30	r19c7	2854.88	0.0665938	482.932	0.999132	2371.94	1.98279	1.02732	1.87125	C1C1	c1s1
18	5	C1C1 rho c1s1 d87	YPEG	30	4	YPEG_30	r18c5	2972.23	0.0641139	477.41	0.999022	2494.82	2.0643	0.98906	1.96819	C1C1	c1s1
18	4	C1C1 rho c1s1 d87	YPEG	30	4	YPEG_30	r18c4	3056.55	0.0616406	487.577	0.999377	2568.97	2.12286	0.950906	2.02669	C1C1	c1s1
18	3	C1C1 rho c1s1 d87	YPEG	30	4	YPEG_30	r18c3	3145.78	0.0616823	484.554	0.999399	2661.23	2.18484	0.951548	2.09947	C1C1	c1s1
18	7	C1C1 rho c1s1 d87	YPEG	30	4	YPEG_30	r18c7	2854.51	0.0664738	469.92	0.998972	2384.59	1.98254	1.02547	1.88122	C1C1	c1s1
18	6	C1C1 rho c1s1 d87	YPEG	30	4	YPEG_30	r18c6	2882.17	0.0664559	464.756	0.998837	2417.41	2.00175	1.02519	1.90712	C1C1	c1s1
27	43	C1C1 rho c1s1 d111	YPD	30	4	YPD_30	r27c43	2400.34	0.109978	686.014	0.993543	1714.32	1.77176	0.507483	1.7089	C1C1	c1s1
27	42	C1C1 rho c1s1 d111	YPD	30	4	YPD_30	r27c42	2327.16	0.112292	659.866	0.993364	1667.29	1.71774	0.518163	1.66202	C1C1	c1s1
27	45	C1C1 rho c1s1 d111	YPD	30	4	YPD_30	r27c45	2510.73	0.105025	672.374	0.993302	1838.36	1.85324	0.48463	1.83255	C1C1	c1s1
27	44	C1C1 rho c1s1 d111	YPD	30	4	YPD_30	r27c44	2410.7	0.10756	679.168	0.993118	1731.53	1.7794	0.496327	1.72605	C1C1	c1s1
27	46	C1C1 rho c1s1 d111	YPD	30	4	YPD_30	r27c46	2625.51	0.0983389	660.901	0.994002	1964.61	1.93796	0.453777	1.95839	C1C1	c1s1
26	46	C1C1 rho c1s1 d111	YPD	30	4	YPD_30	r26c46	2703.22	0.0951861	697.109	0.993233	2006.11	1.99533	0.439229	1.99977	C1C1	c1s1
26	44	C1C1 rho c1s1 d111	YPD	30	4	YPD_30	r26c44	2437.02	0.10697	688.324	0.993476	1748.69	1.79883	0.493604	1.74316	C1C1	c1s1
26	43	C1C1 rho c1s1 d111	YPD	30	4	YPD_30	r26c43	2344.77	0.110627	661.146	0.993363	1683.63	1.73075	0.51048	1.67831	C1C1	c1s1
26	42	C1C1 rho c1s1 d111	YPD	30	4	YPD_30	r26c42	2336.11	0.112011	662.916	0.993278	1673.2	1.72435	0.516866	1.66791	C1C1	c1s1
26	45	C1C1 rho c1s1 d111	YPD	30	4	YPD_30	r26c45	2478.93	0.103035	672.663	0.993809	1806.26	1.82977	0.475447	1.80055	C1C1	c1s1
22	42	C1C1 rho c1e4 pr41	YPD	37	3	YPD_37	r22c42	2386.61	0.102167	831.003	0.987639	1555.6	1.49057	0.612618	1.30501	C1C1	c1e4
22	43	C1C1 rho c1e4 pr41	YPD	37	3	YPD_37	r22c43	2415.89	0.099453	832.111	0.98775	1583.78	1.50886	0.596347	1.32865	C1C1	c1e4
22	45	C1C1 rho c1e4 pr41	YPD	37	3	YPD_37	r22c45	2509.5	0.0956777	824.663	0.988344	1684.84	1.56732	0.573709	1.41342	C1C1	c1e4
22	46	C1C1 rho c1e4 pr41	YPD	37	3	YPD_37	r22c46	2620.09	0.0921896	810.902	0.989021	1809.19	1.6364	0.552794	1.51775	C1C1	c1e4
22	44	C1C1 rho c1e4 pr41	YPD	37	3	YPD_37	r22c44	2447.62	0.0972113	833.833	0.988	1613.78	1.52868	0.582905	1.35382	C1C1	c1e4
23	42	C1C1 rho c1e4 pr41	YPD	37	3	YPD_37	r23c42	2387.52	0.10092	830.642	0.987422	1556.88	1.49114	0.605141	1.30608	C1C1	c1e4
23	43	C1C1 rho c1e4 pr41	YPD	37	3	YPD_37	r23c43	2371.08	0.0991812	808.517	0.987157	1562.56	1.48087	0.594717	1.31084	C1C1	c1e4
23	46	C1C1 rho c1e4 pr41	YPD	37	3	YPD_37	r23c46	2565.83	0.094632	783.663	0.989092	1782.16	1.60251	0.567439	1.49507	C1C1	c1e4
23	44	C1C1 rho c1e4 pr41	YPD	37	3	YPD_37	r23c44	2416.74	0.0967887	820.636	0.98819	1596.11	1.50939	0.580371	1.33899	C1C1	c1e4
23	45	C1C1 rho c1e4 pr41	YPD	37	3	YPD_37	r23c45	2469.25	0.0961211	798.847	0.987425	1670.41	1.54219	0.576368	1.40132	C1C1	c1e4
7	10	C1C1 rho c1e4 pr14	YPEG	37	3	YPEG_37	r7c10	2181.12	0.0582499	462.053	0.994461	1719.06	1.81491	0.818054	1.69232	C1C1	c1e4
7	11	C1C1 rho c1e4 pr14	YPEG	37	3	YPEG_37	r7c11	2196.26	0.0591214	461.881	0.994842	1734.38	1.82751	0.830293	1.70739	C1C1	c1e4
7	12	C1C1 rho c1e4 pr14	YPEG	37	3	YPEG_37	r7c12	2047.2	0.0600138	411.168	0.994571	1636.04	1.70348	0.842826	1.61058	C1C1	c1e4
7	13	C1C1 rho c1e4 pr14	YPEG	37	3	YPEG_37	r7c13	2061.93	0.0607036	414.339	0.994854	1647.59	1.71574	0.852513	1.62196	C1C1	c1e4
[truncated: 54,074 more rows]
